# Supplementary material for: Probing the effect of a 3′-S-phosphorothiolate link on the conformation of a DNA:RNA hybrid; implications for antisense drug designElectronic supplementary information (ESI) available: diagram showing sulfur link, UV melting curves, sample PE-COSY spectra, further NOE intensity data. See: http://www.rsc.org/suppdata/cc/b2/b203582k/
Source: Royal Society of Chemistry journal article supplement (doi:10.1039/b203582k), 2002-06-06
Supplement: b203582k.doc [file b203582k.doc]

# Supplementary data

**Supporting information. Beevers et al.**

**Linkage (dinucleotide shown for ease of drawing)**

For sequence (**1**) X = S, for sequence (**2**) X = O.

**A number of 1H 2D NMR spectra are reproduced to indicate the quality of the data to hand. These are followed by the UV thermal melting curves for both the modified and non-modified DNA:RNA hybrid.**

**Experimental:**

Spectra for samples in D2O were collected at 298 K with spin lock and nOe mixing times of 100 and 150 or 300 ms respectively; 512 t1 blocks in 2048 points, using hypercomplex and States-TPPI phase cycling for the TOCSY and NOESY spectra respectively. Spectra were recorded on a Bruker DRX 500. Fids were apodized using a Gaussian function (LB = -10 Hz, GB = 0.4) using Felix 95 (Biosym Technoligies Inc., San Deigo, CA.).

**Figure S1.** H2’/H2” – H6/H8 region of the 500 MHz NOESY spectrum of (**A**) the non-modified, and (**B**) modified systems. Xn’/Xn” represents the base cross-peak with the H2’/H2” protons of residue Xn.

**(A)**

**
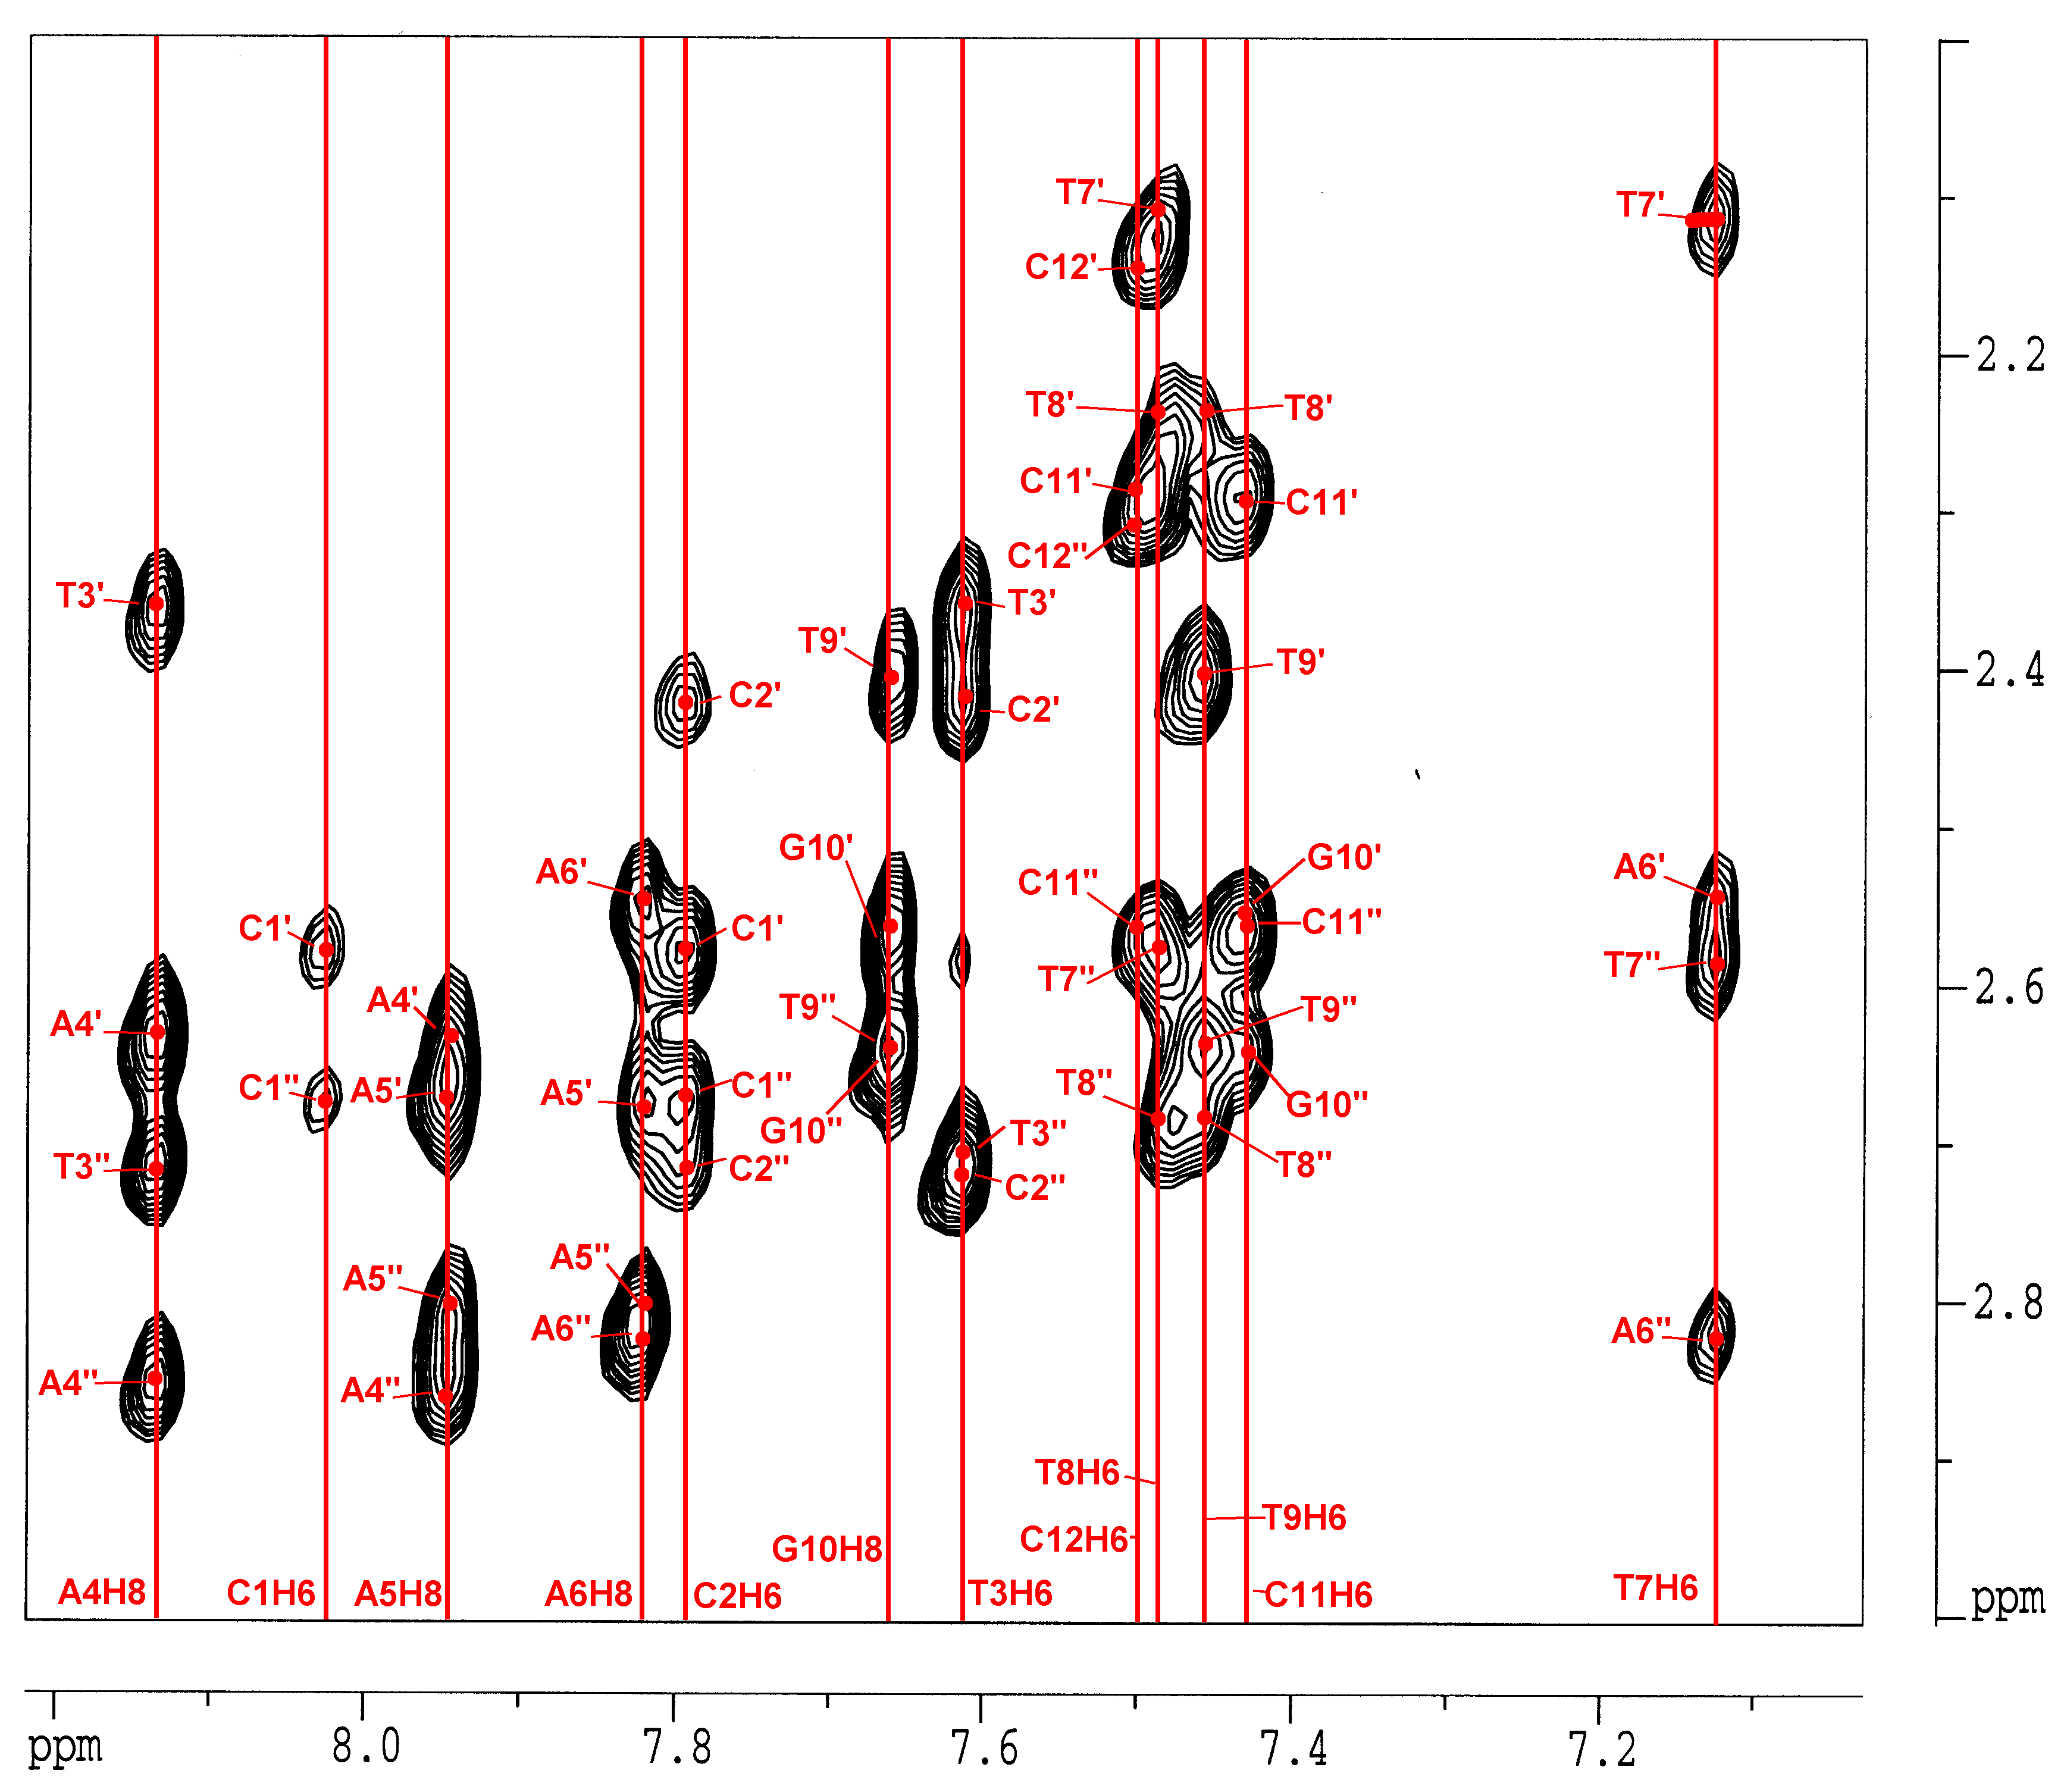
**

**(B)**


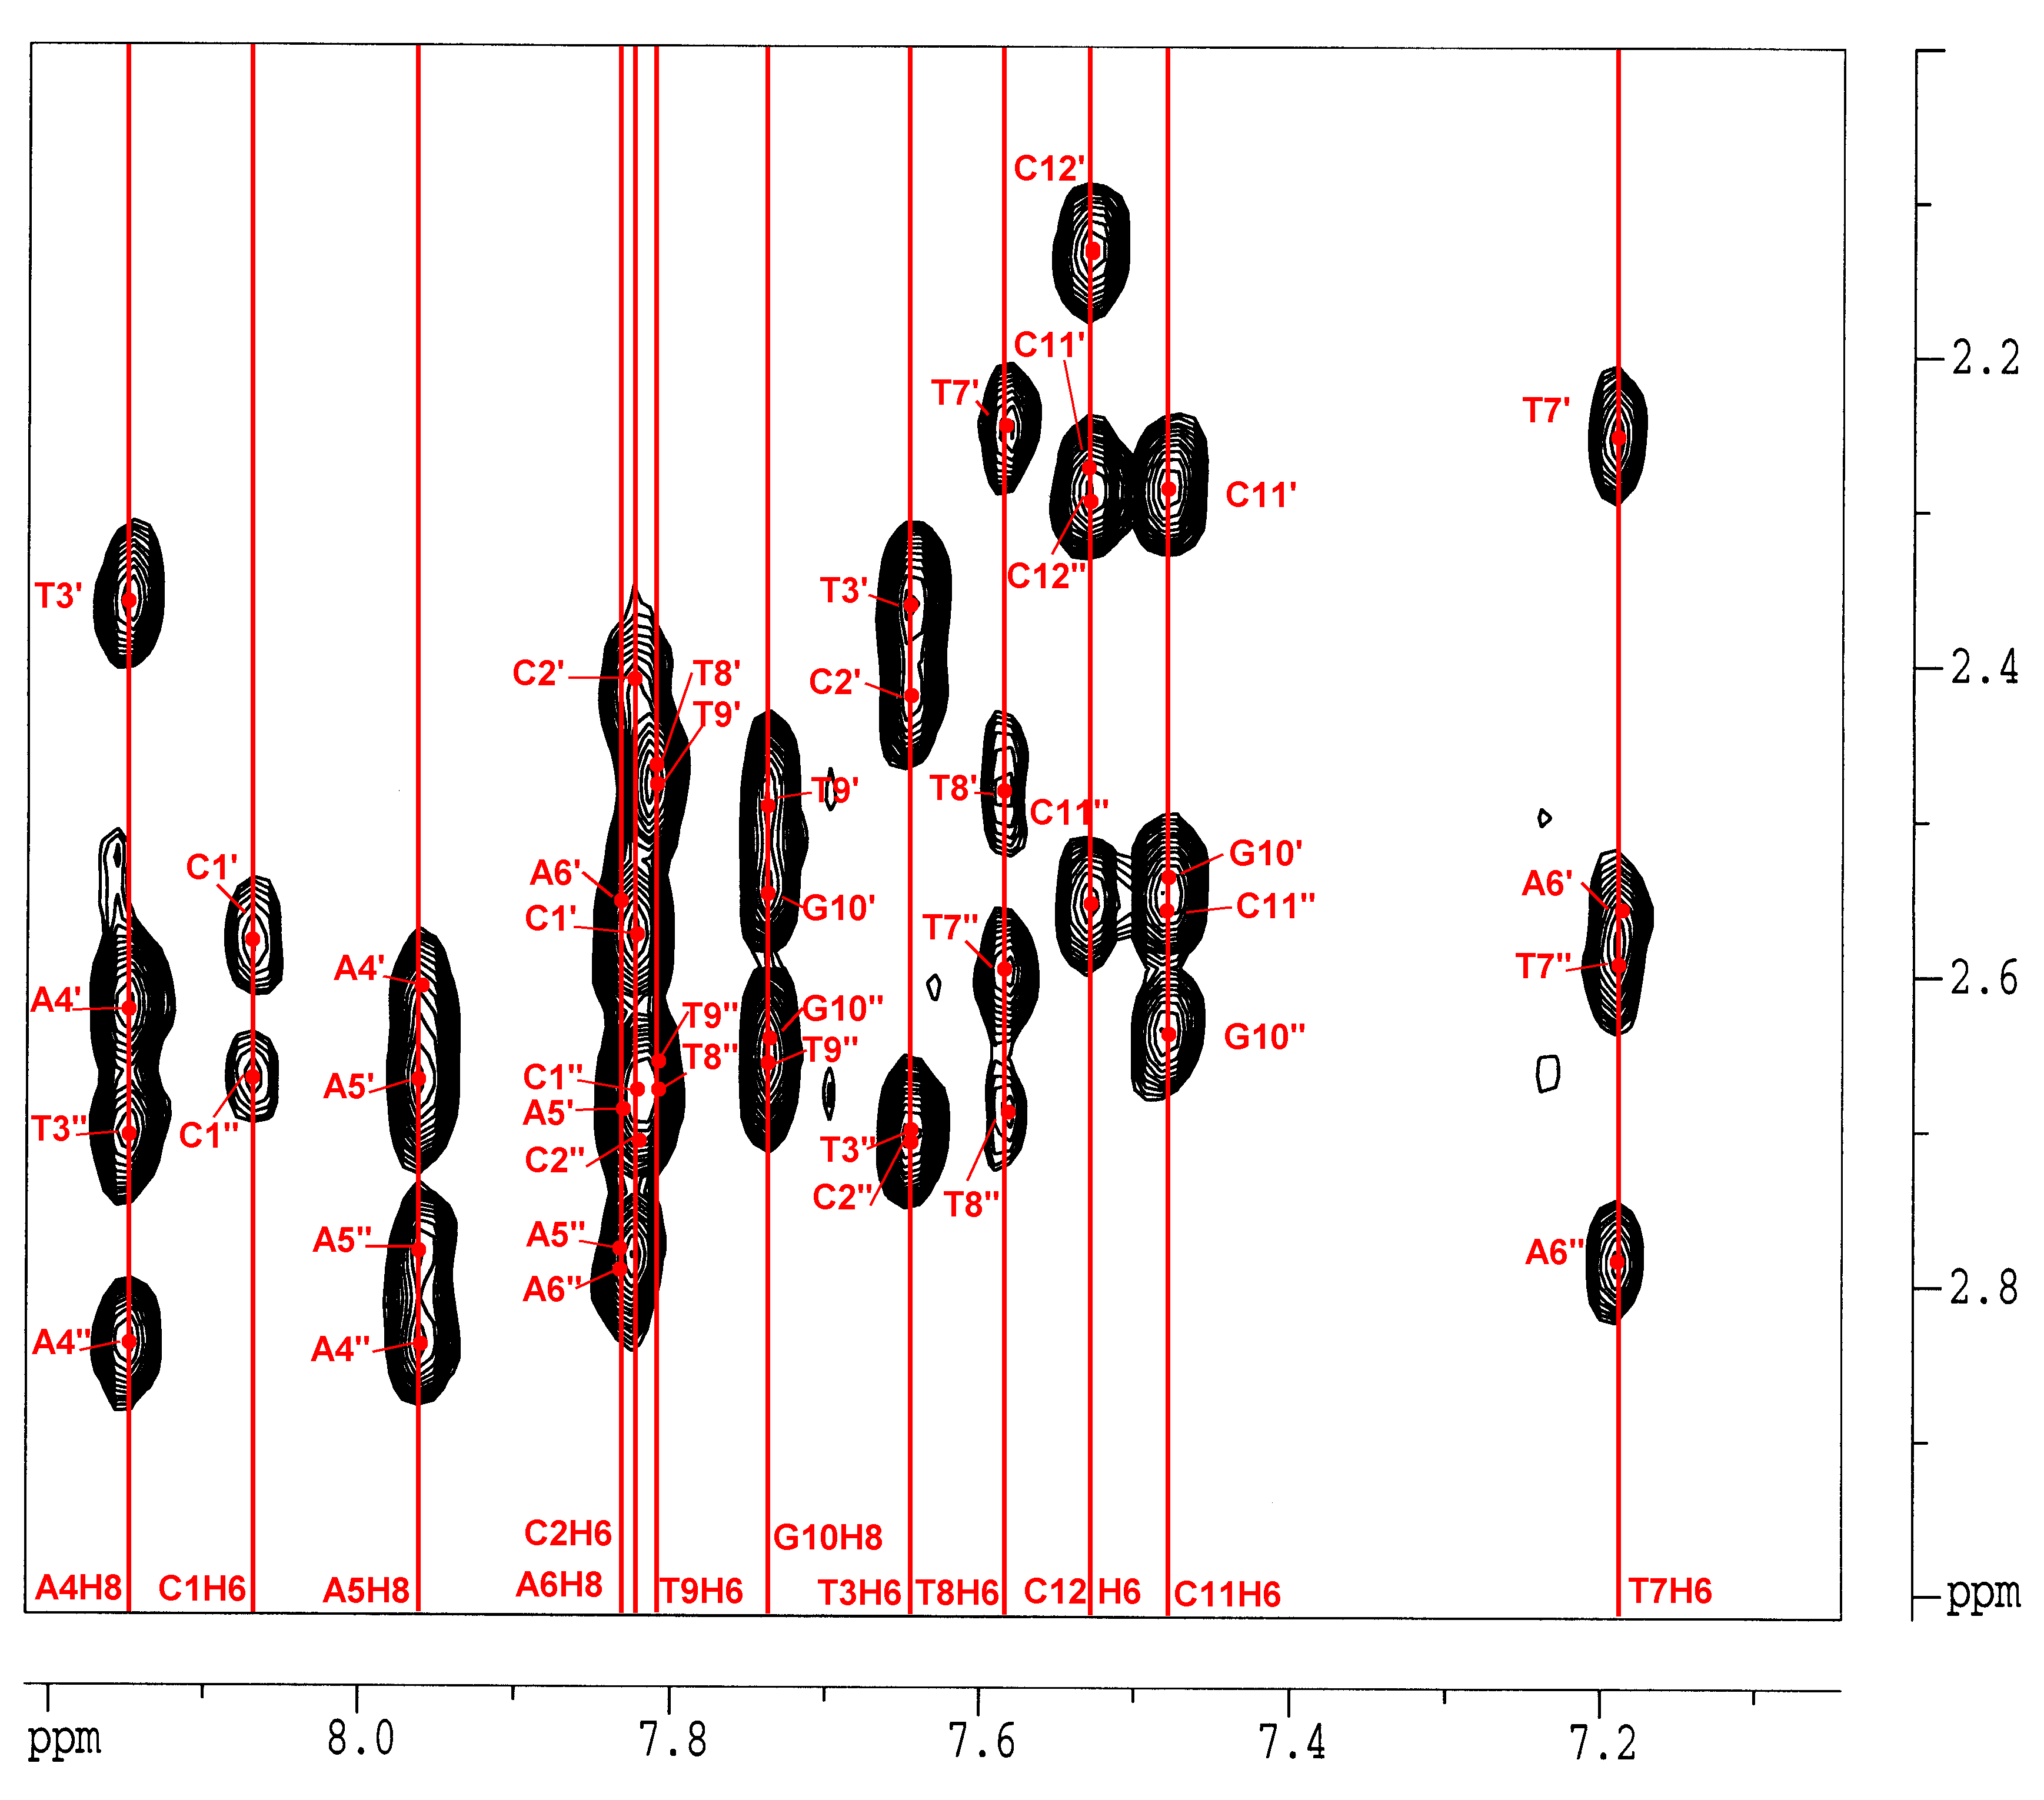


**Figure S2**. H1’-H2’/H2” region of 500 MHz TOCSY (**i**) and NOESY (**ii**) spectrum for the (**A**) non-modified, and (**B**) modified sequences. Xn’/Xn” represents the H1’ cross peak with the H2’/H2” protons of residue Xn

(**Ai**) (**Aii**)

**
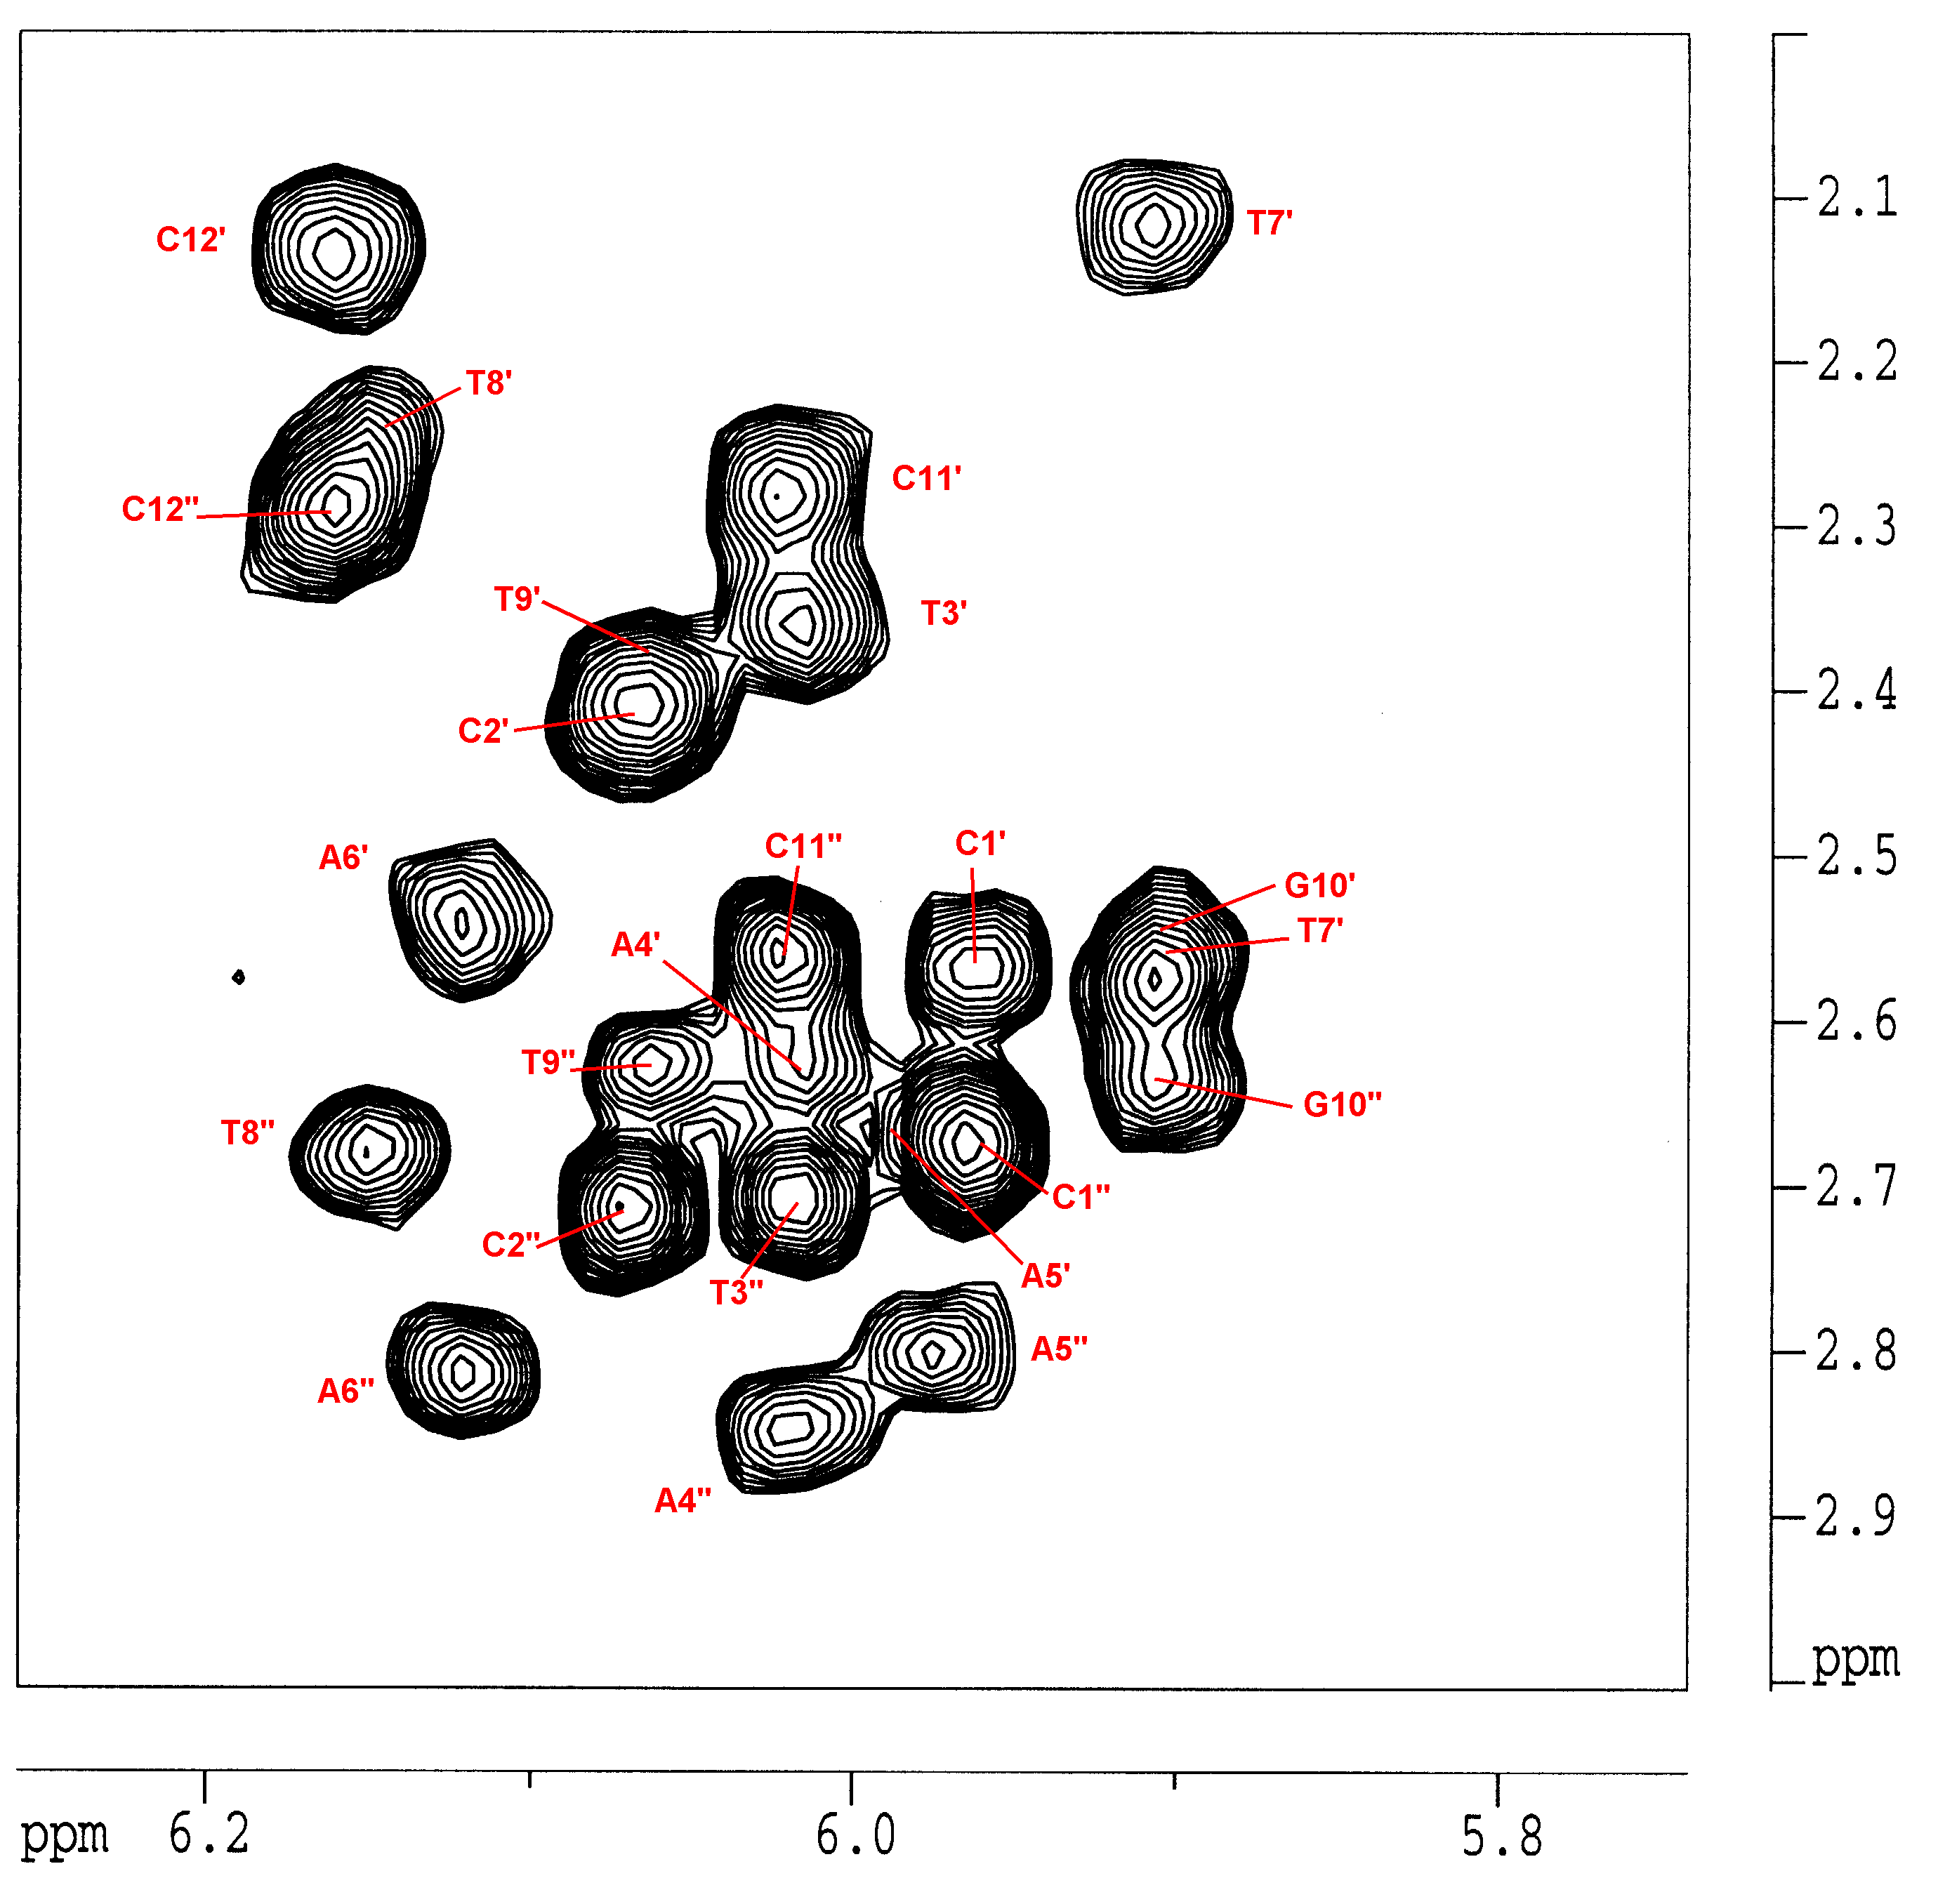

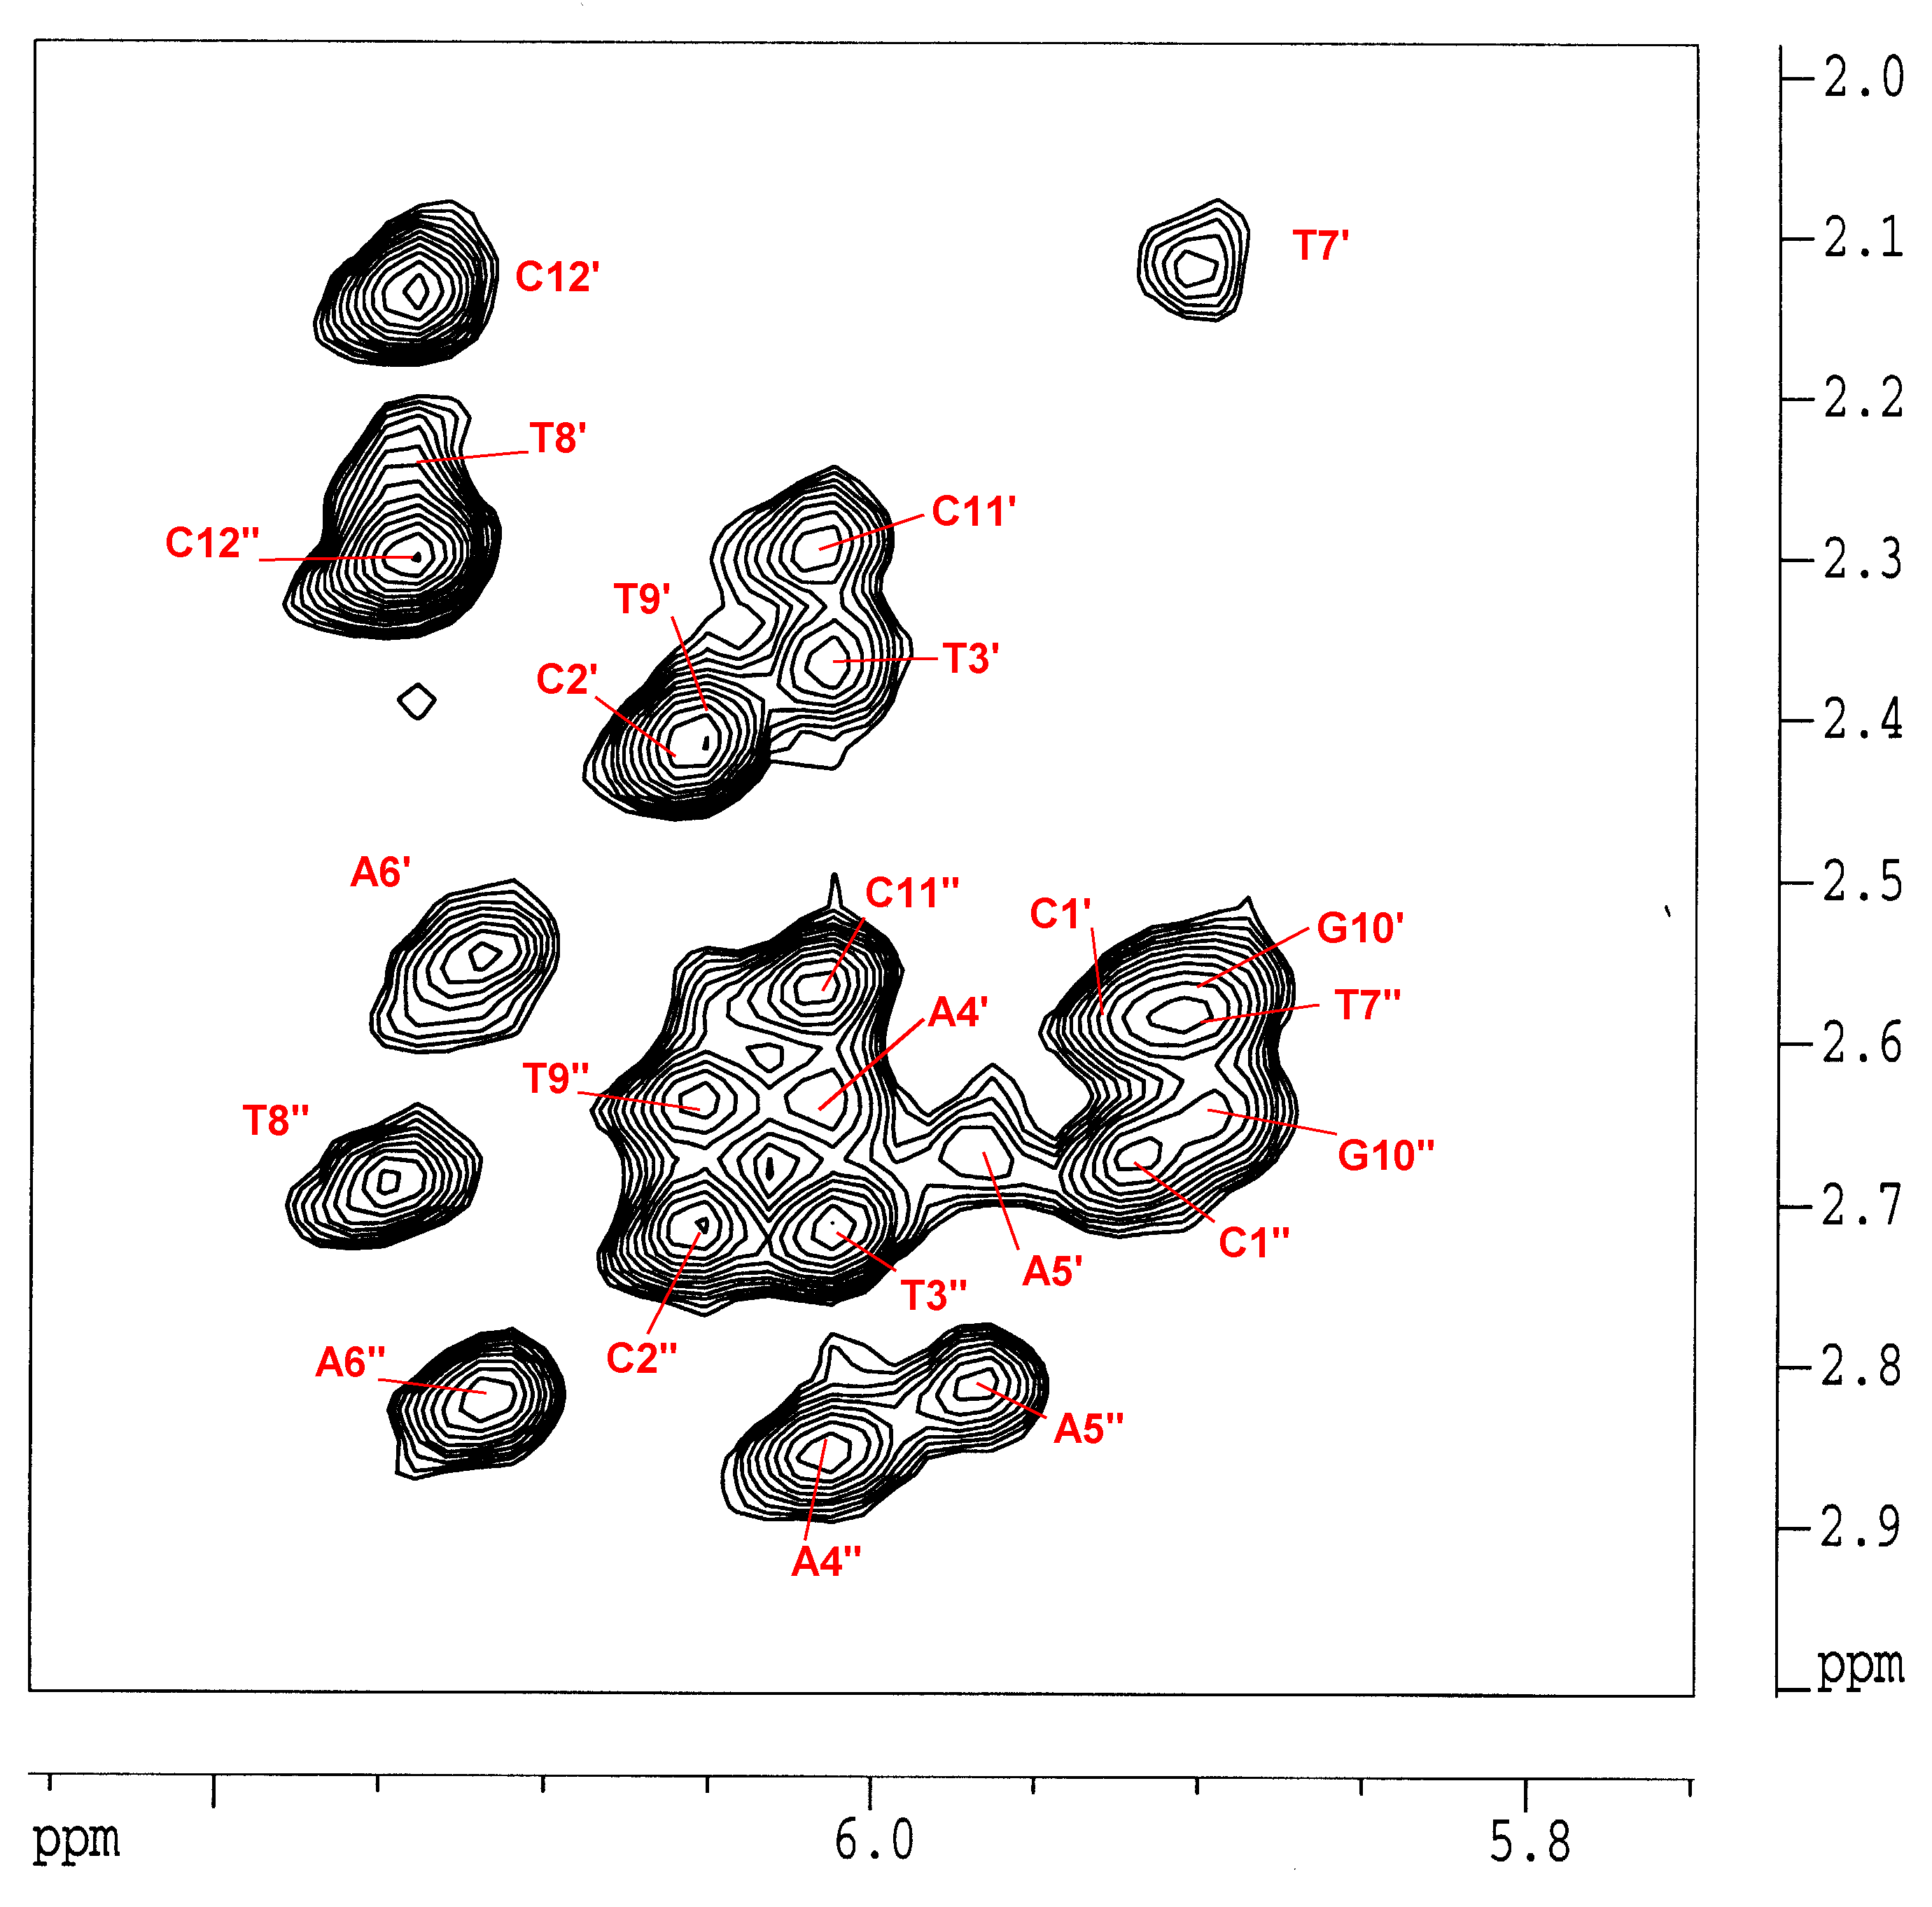
**

**(Bi) (**Bii)
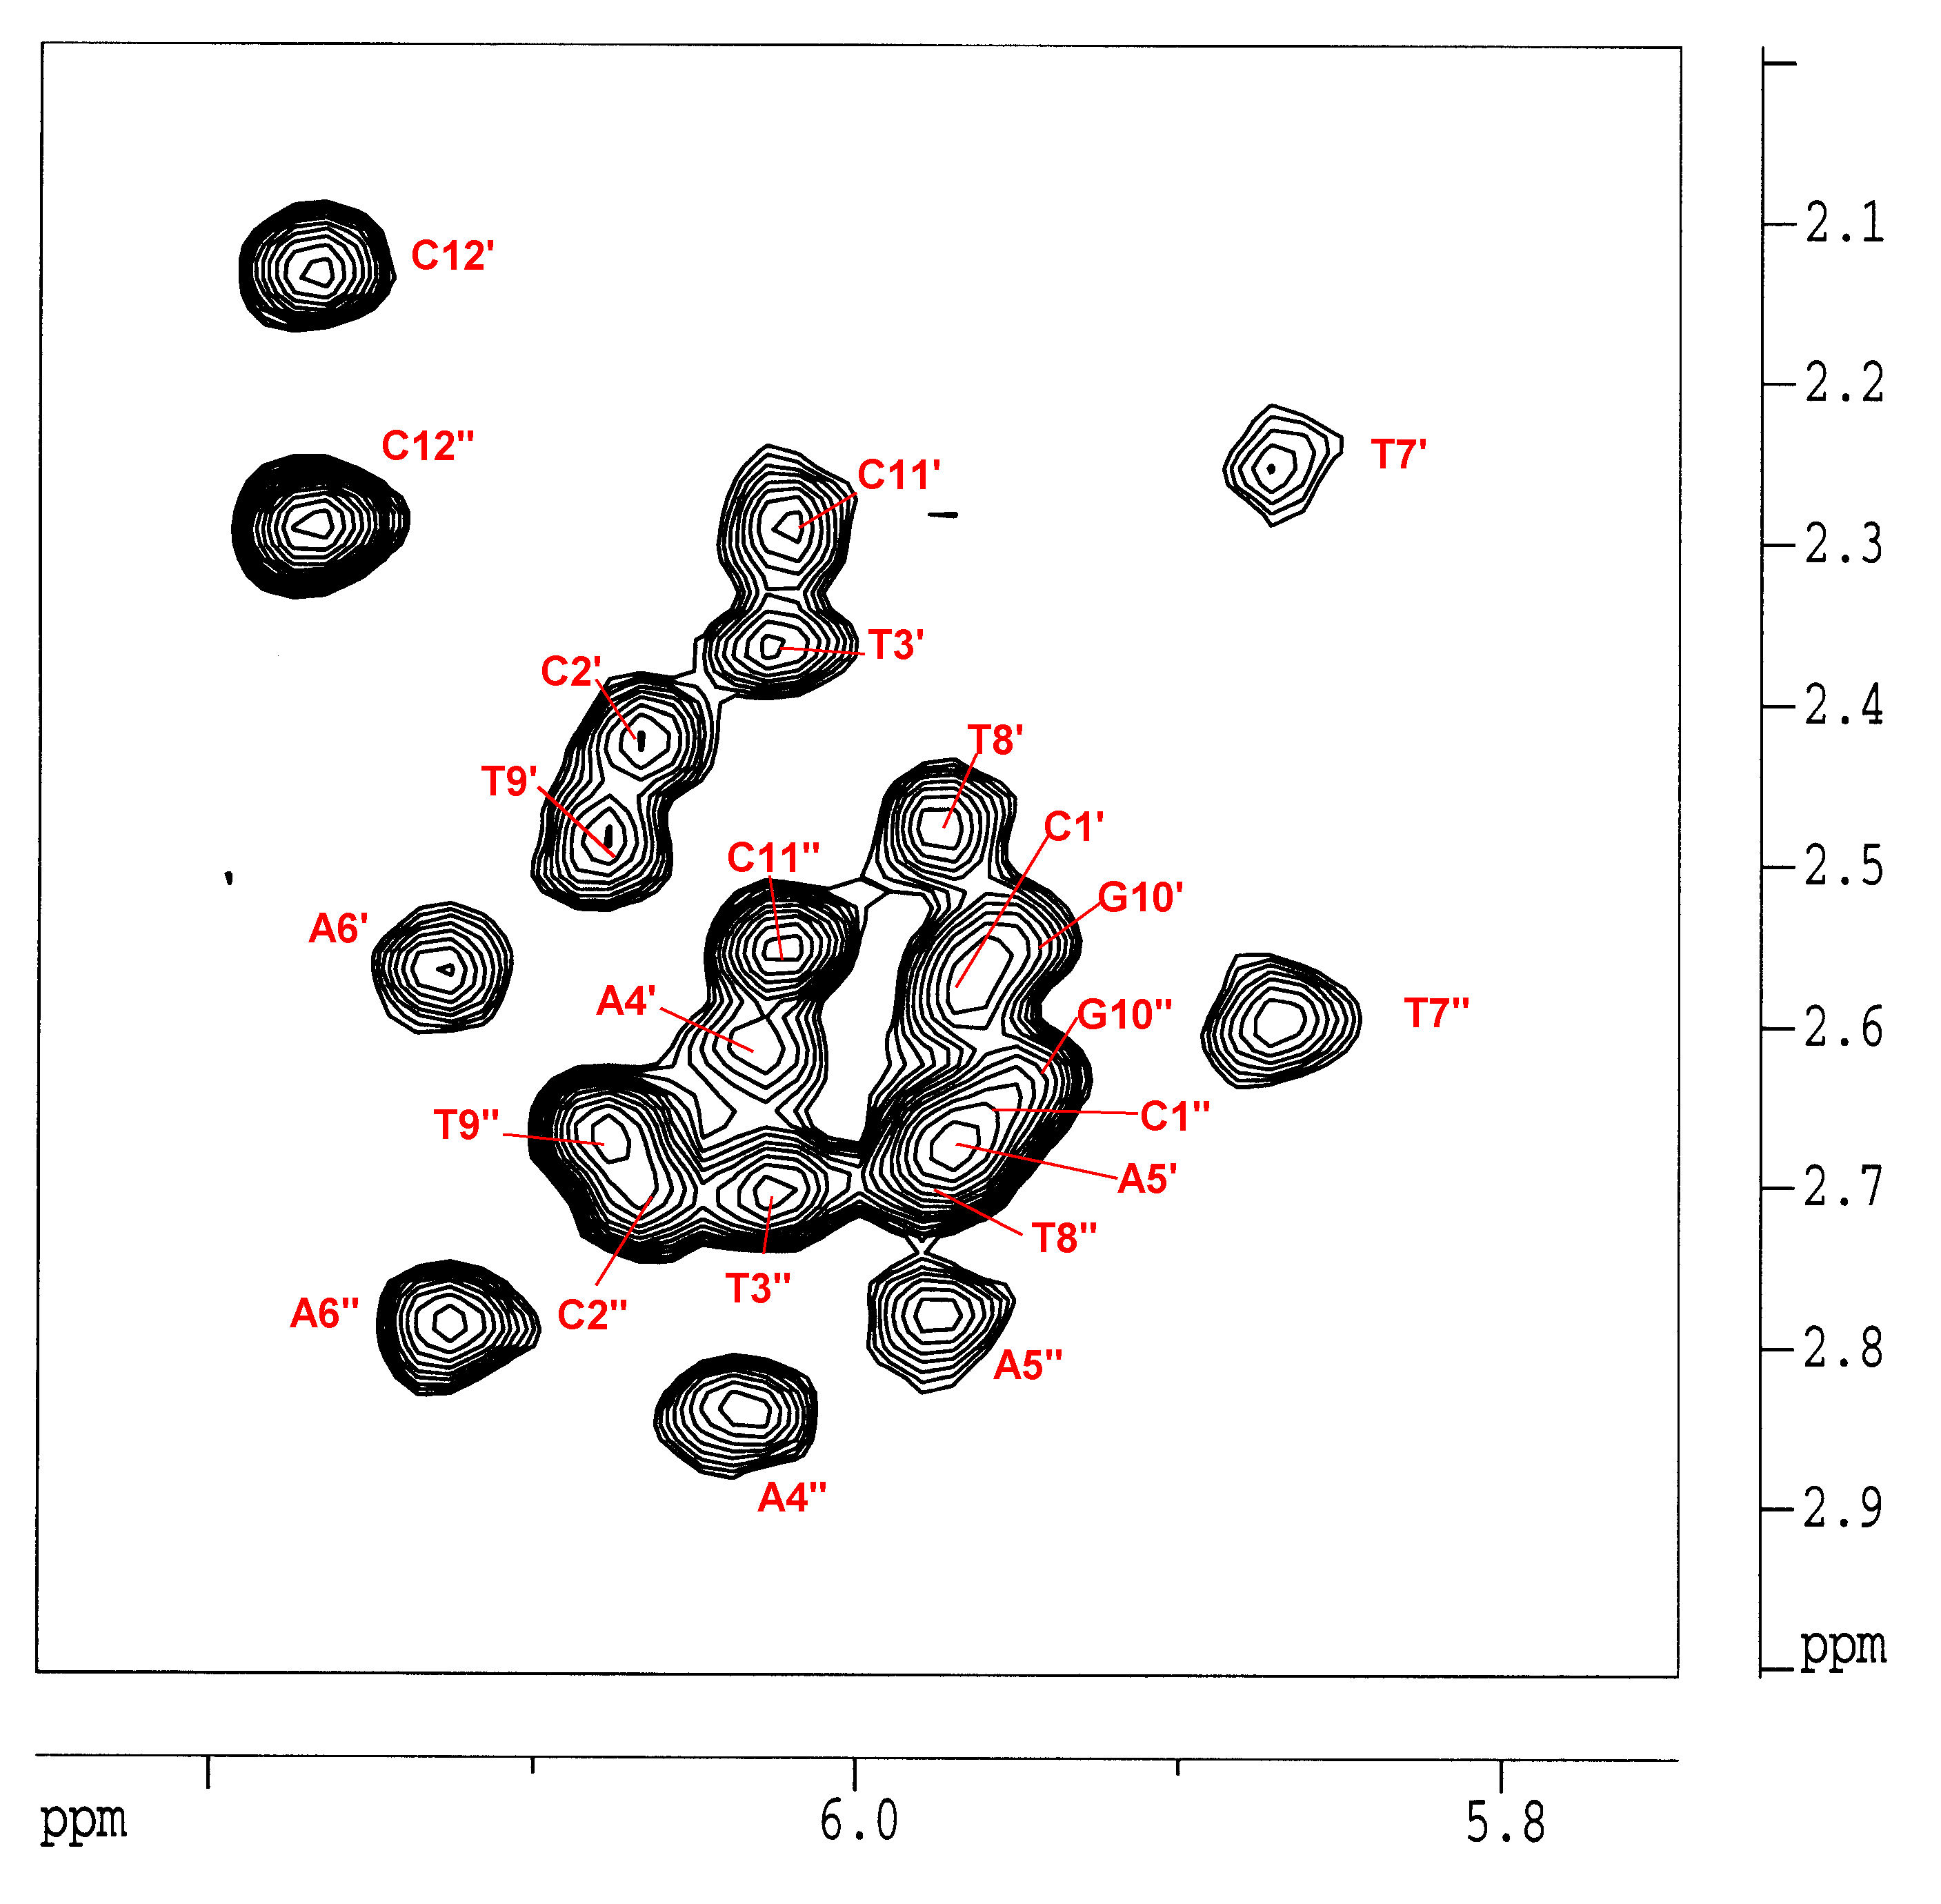

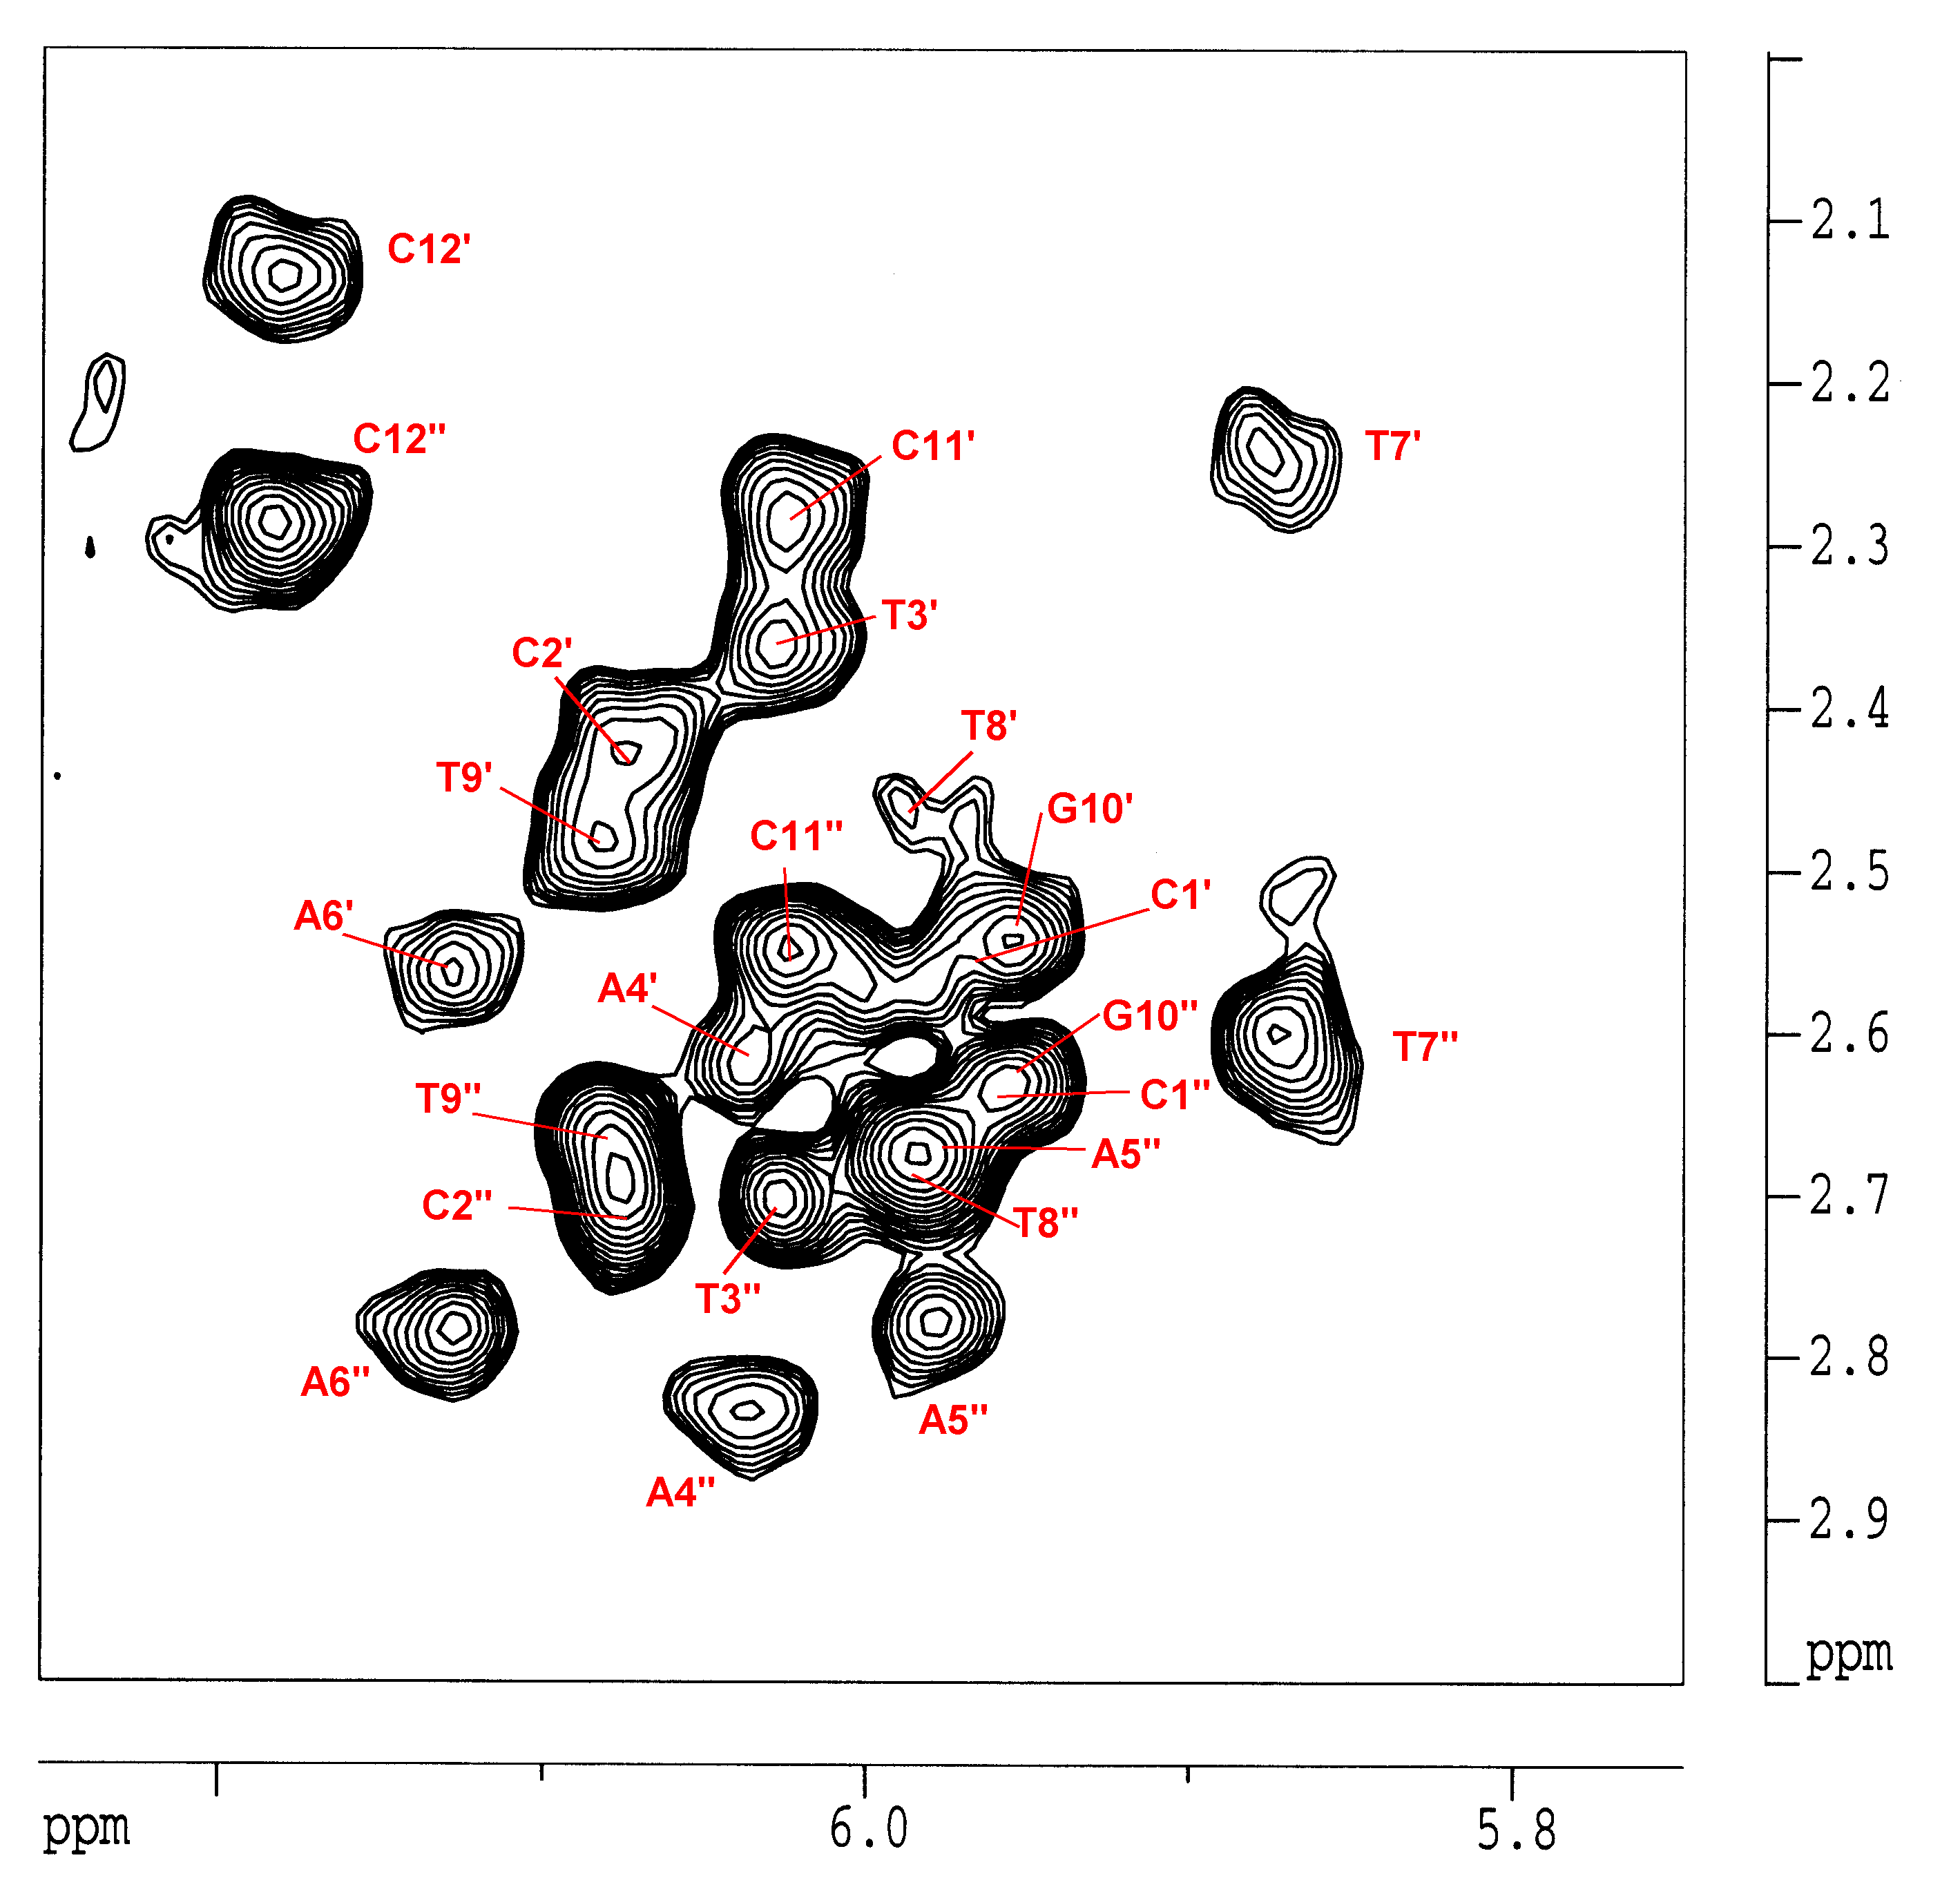


**Figure S3.** H2’-H2” region of 500 MHz (**i**) DQFCOSY and (**ii**) NOESY spectrum for (**A**) non-modified and (**B**) modified systems. Xn represents the H2’-H2” cross peak of sugar Xn.

(**Ai**) (Aii)

**
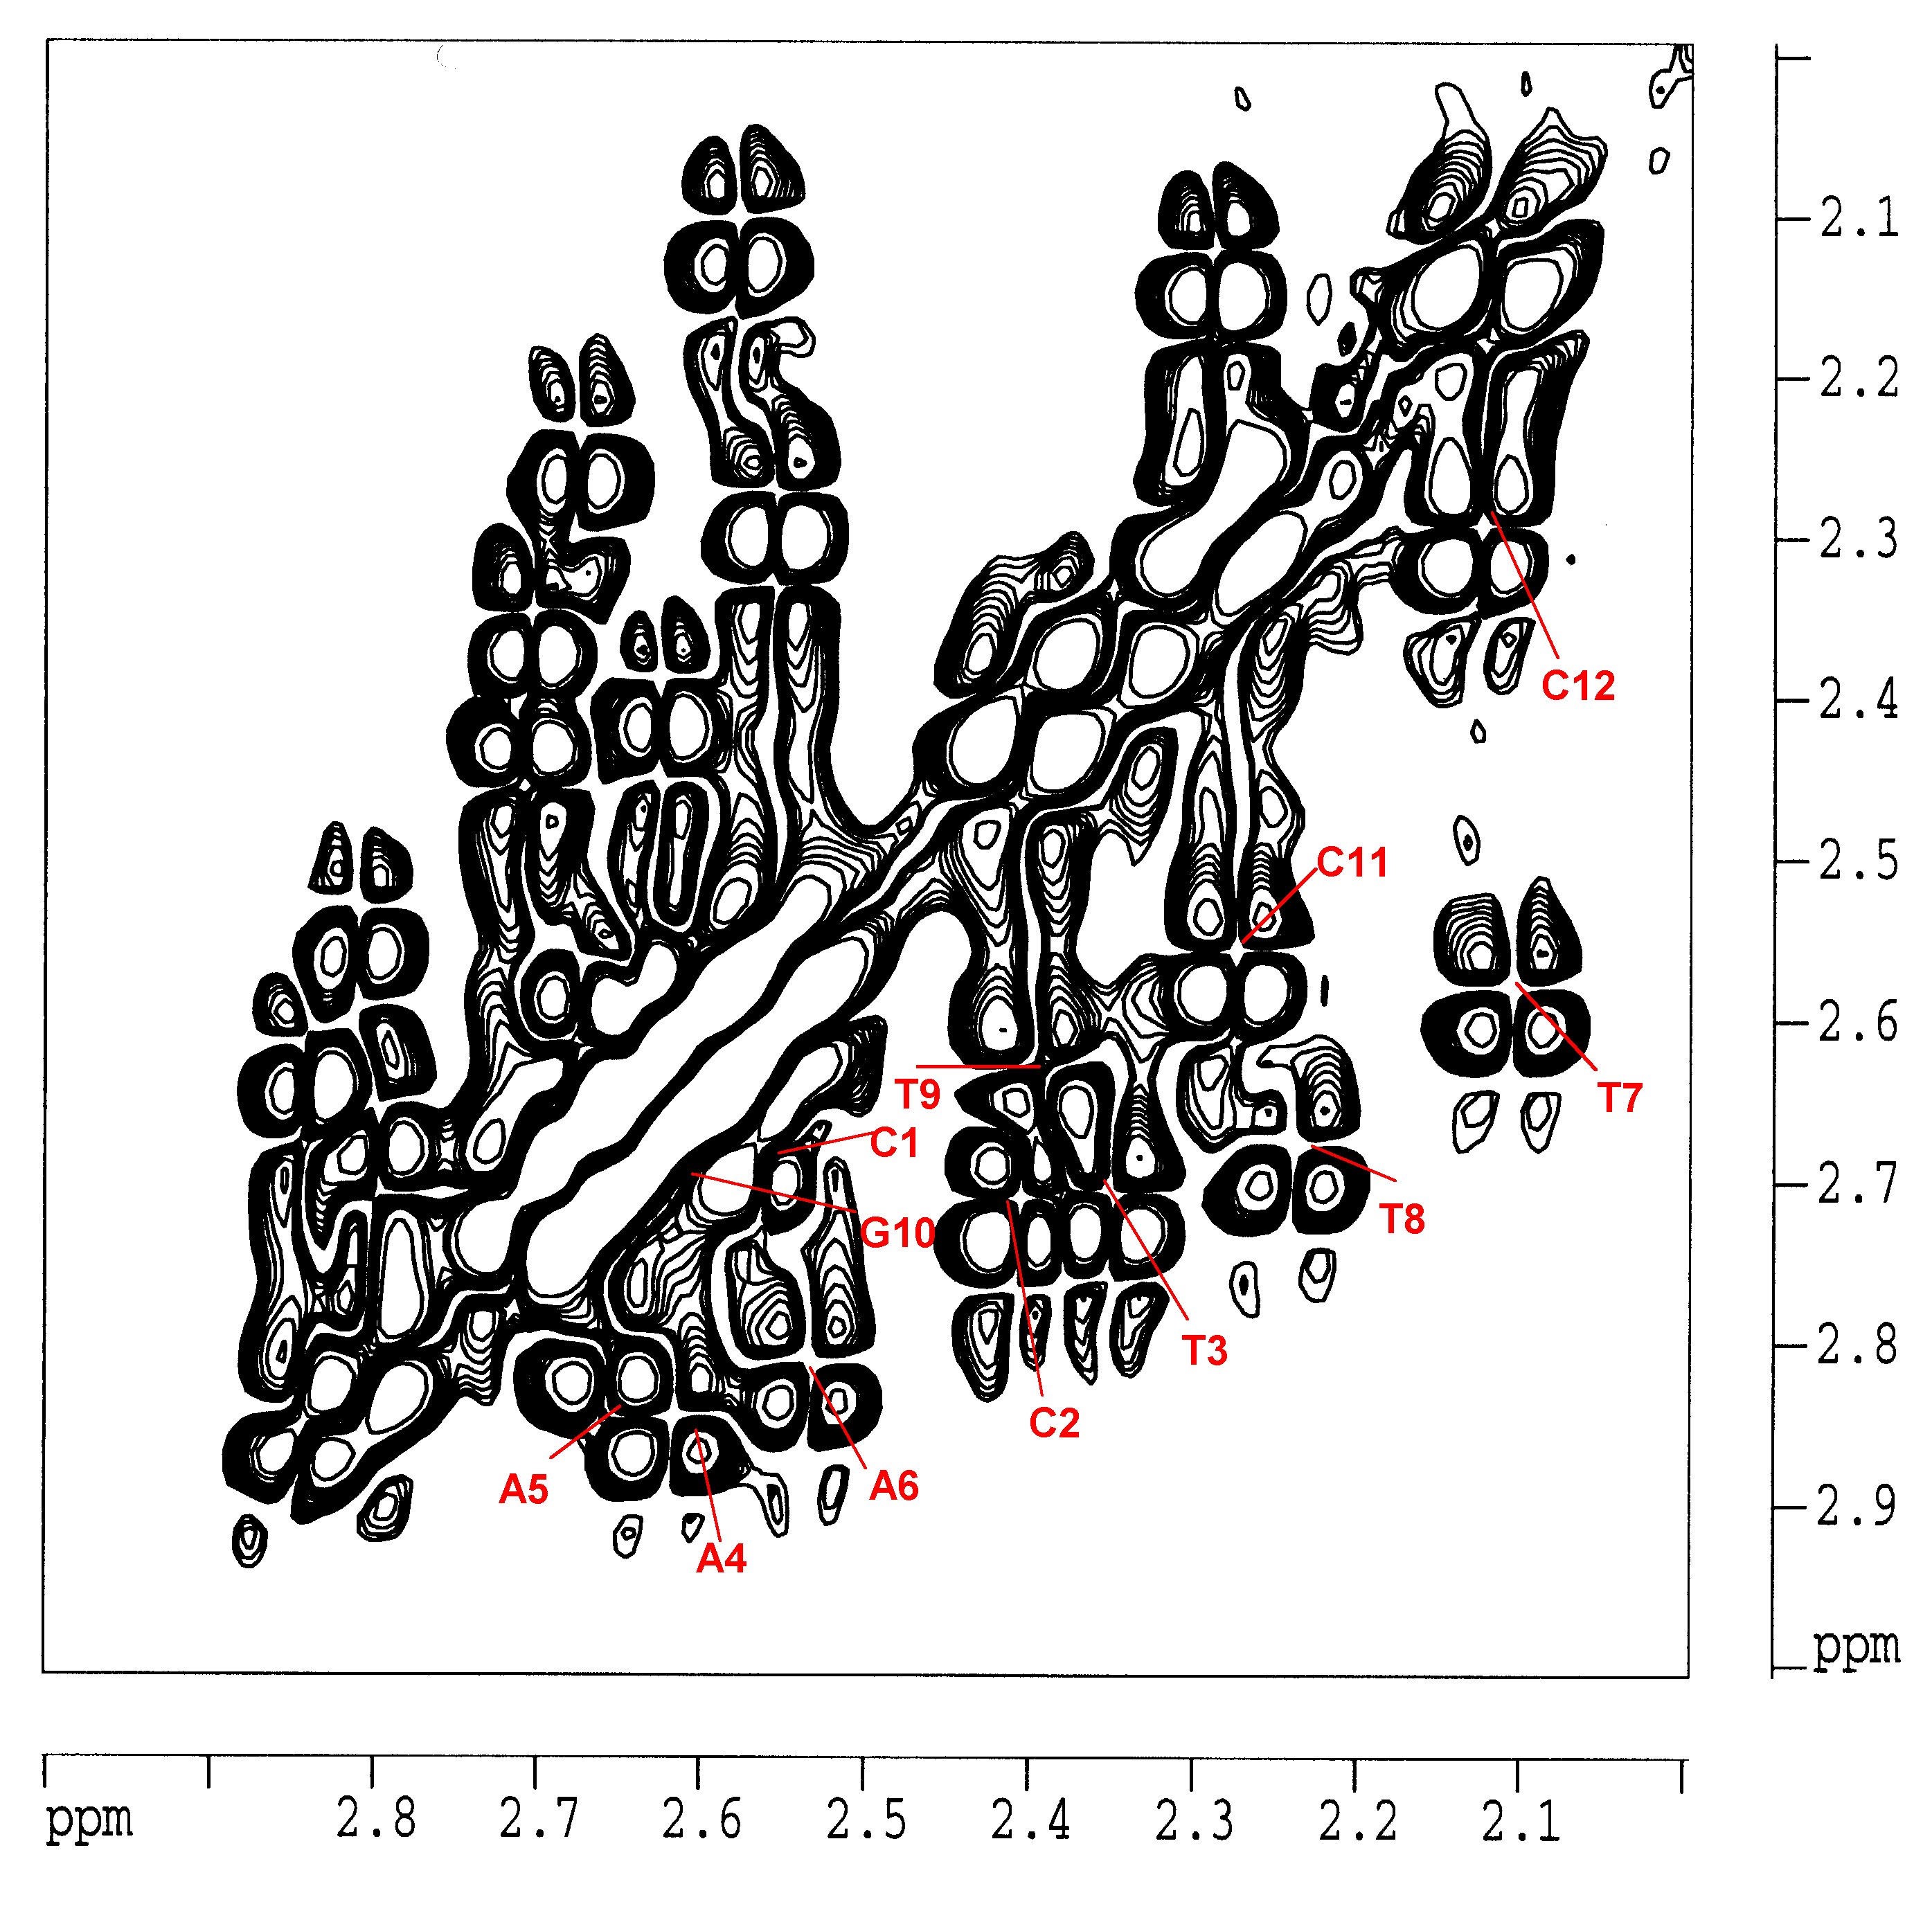
** **
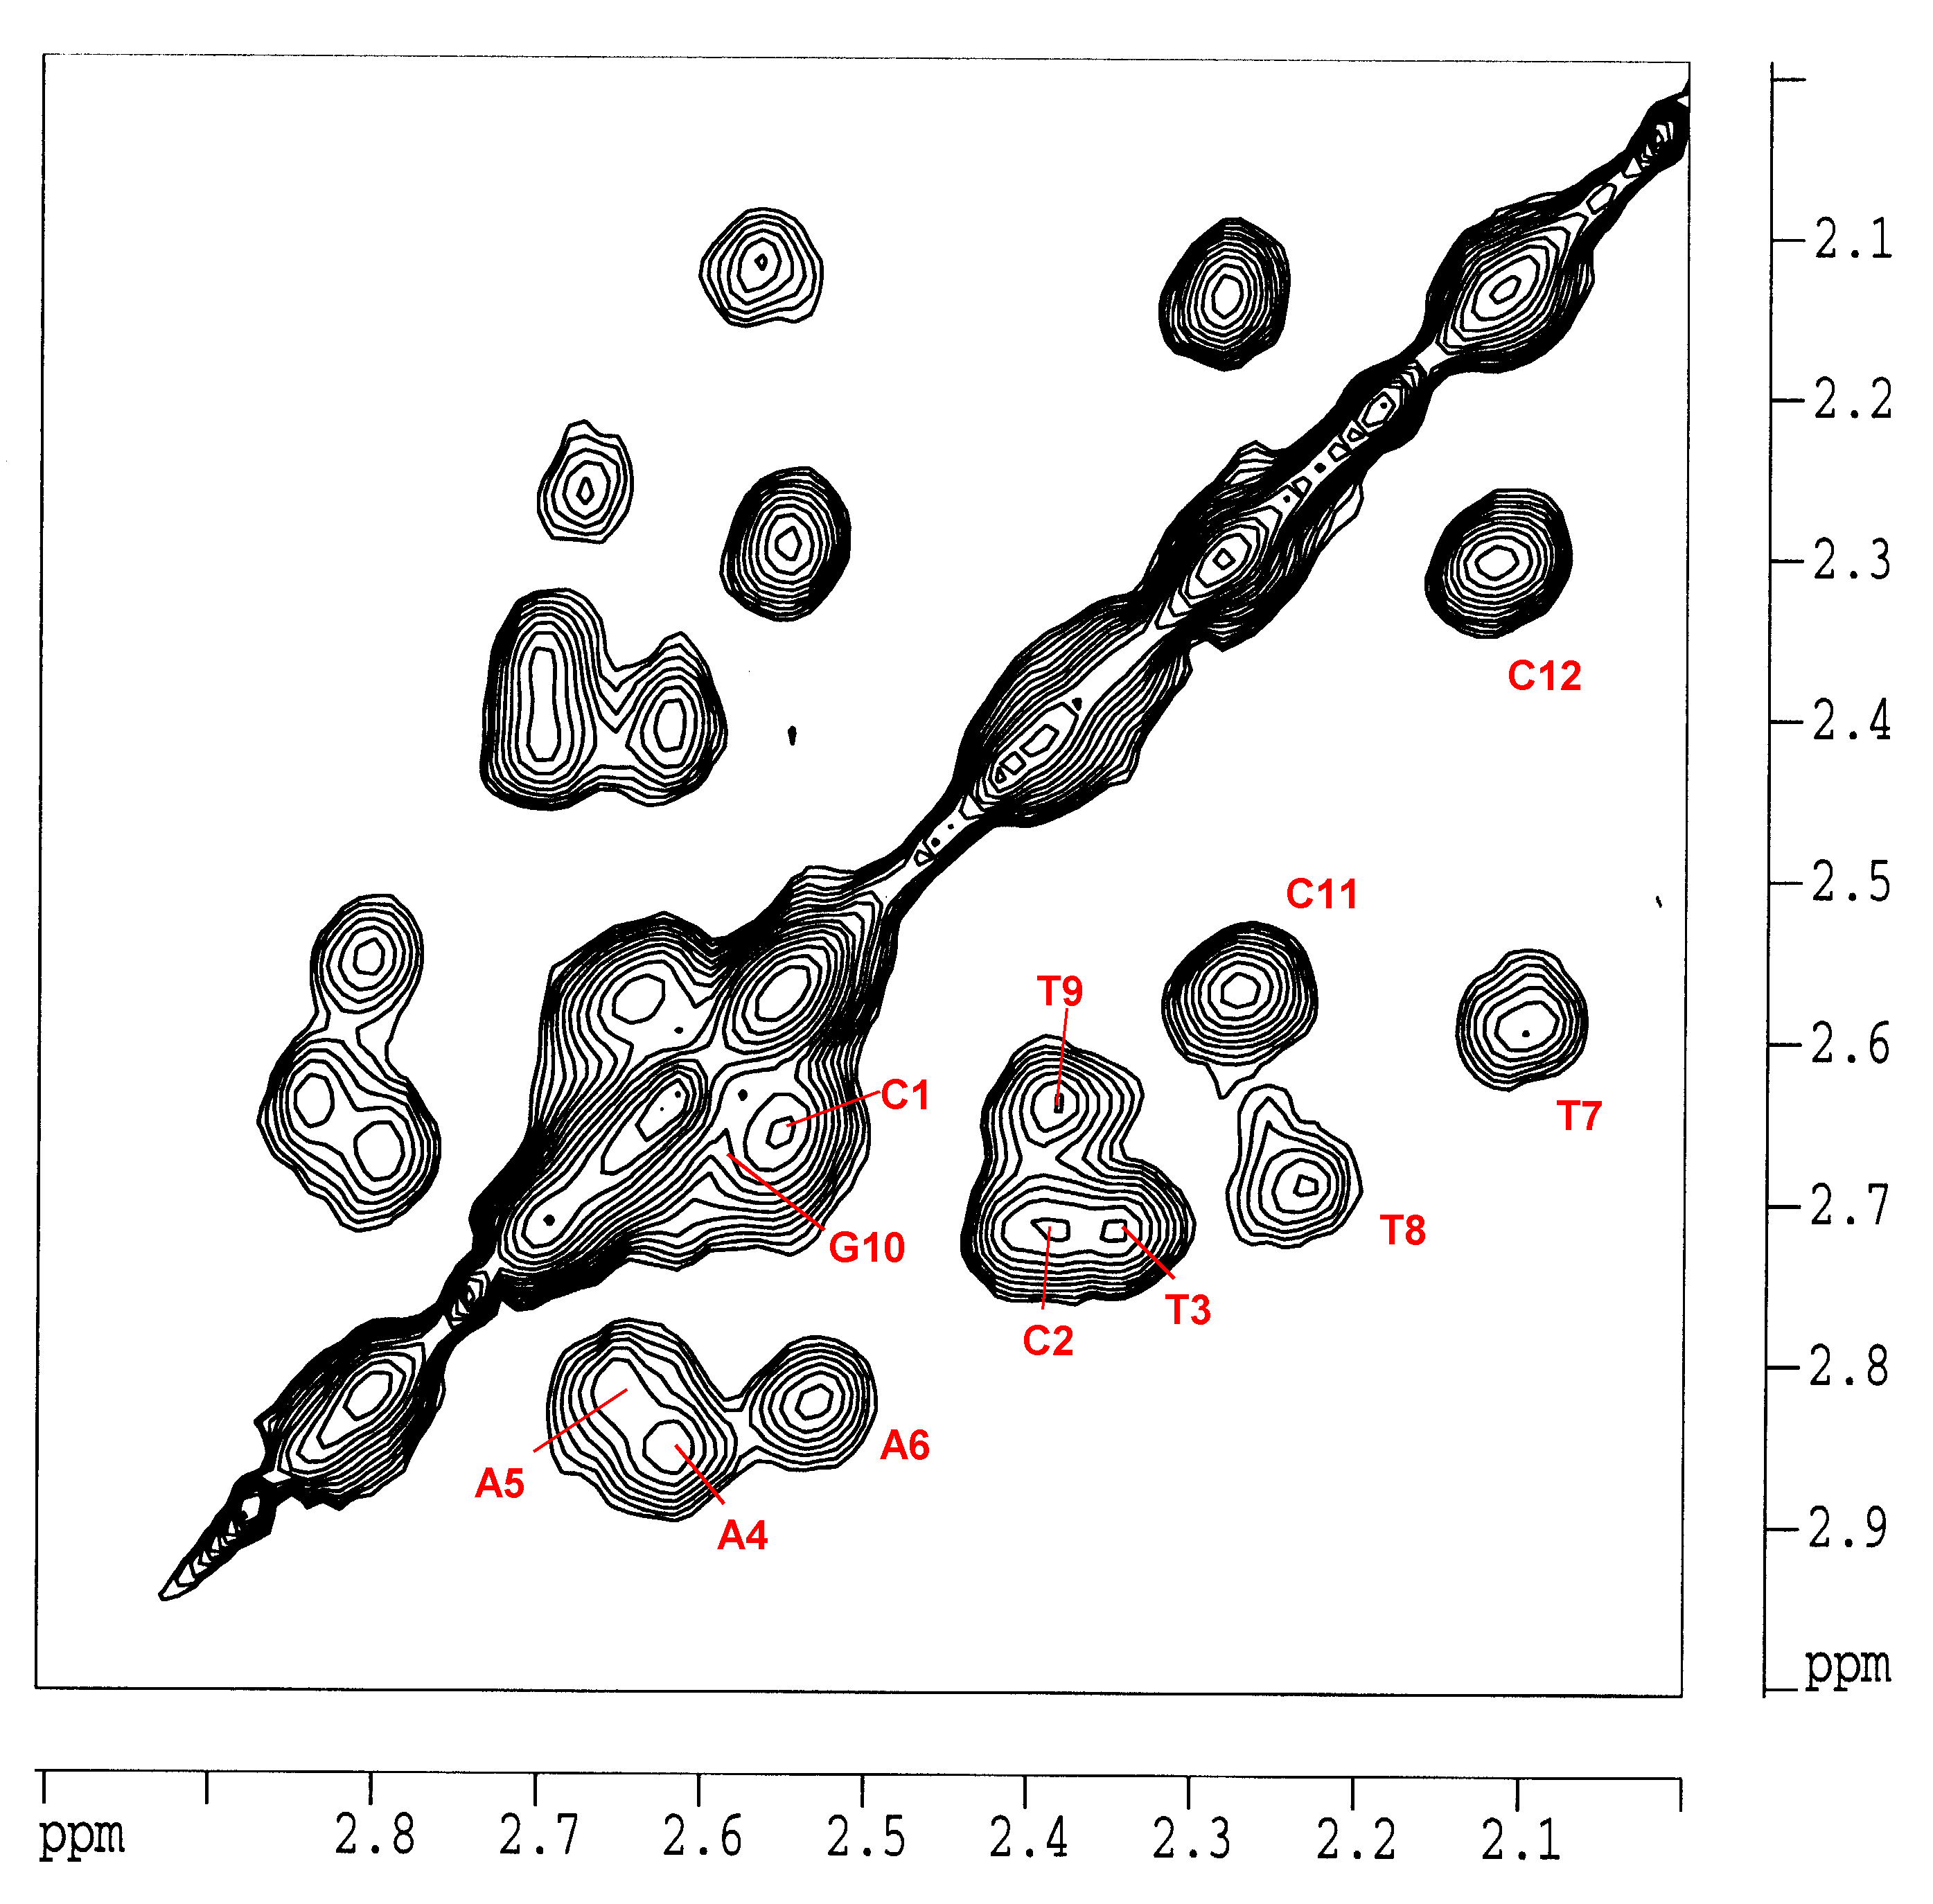
**

(Bi) (Bii)


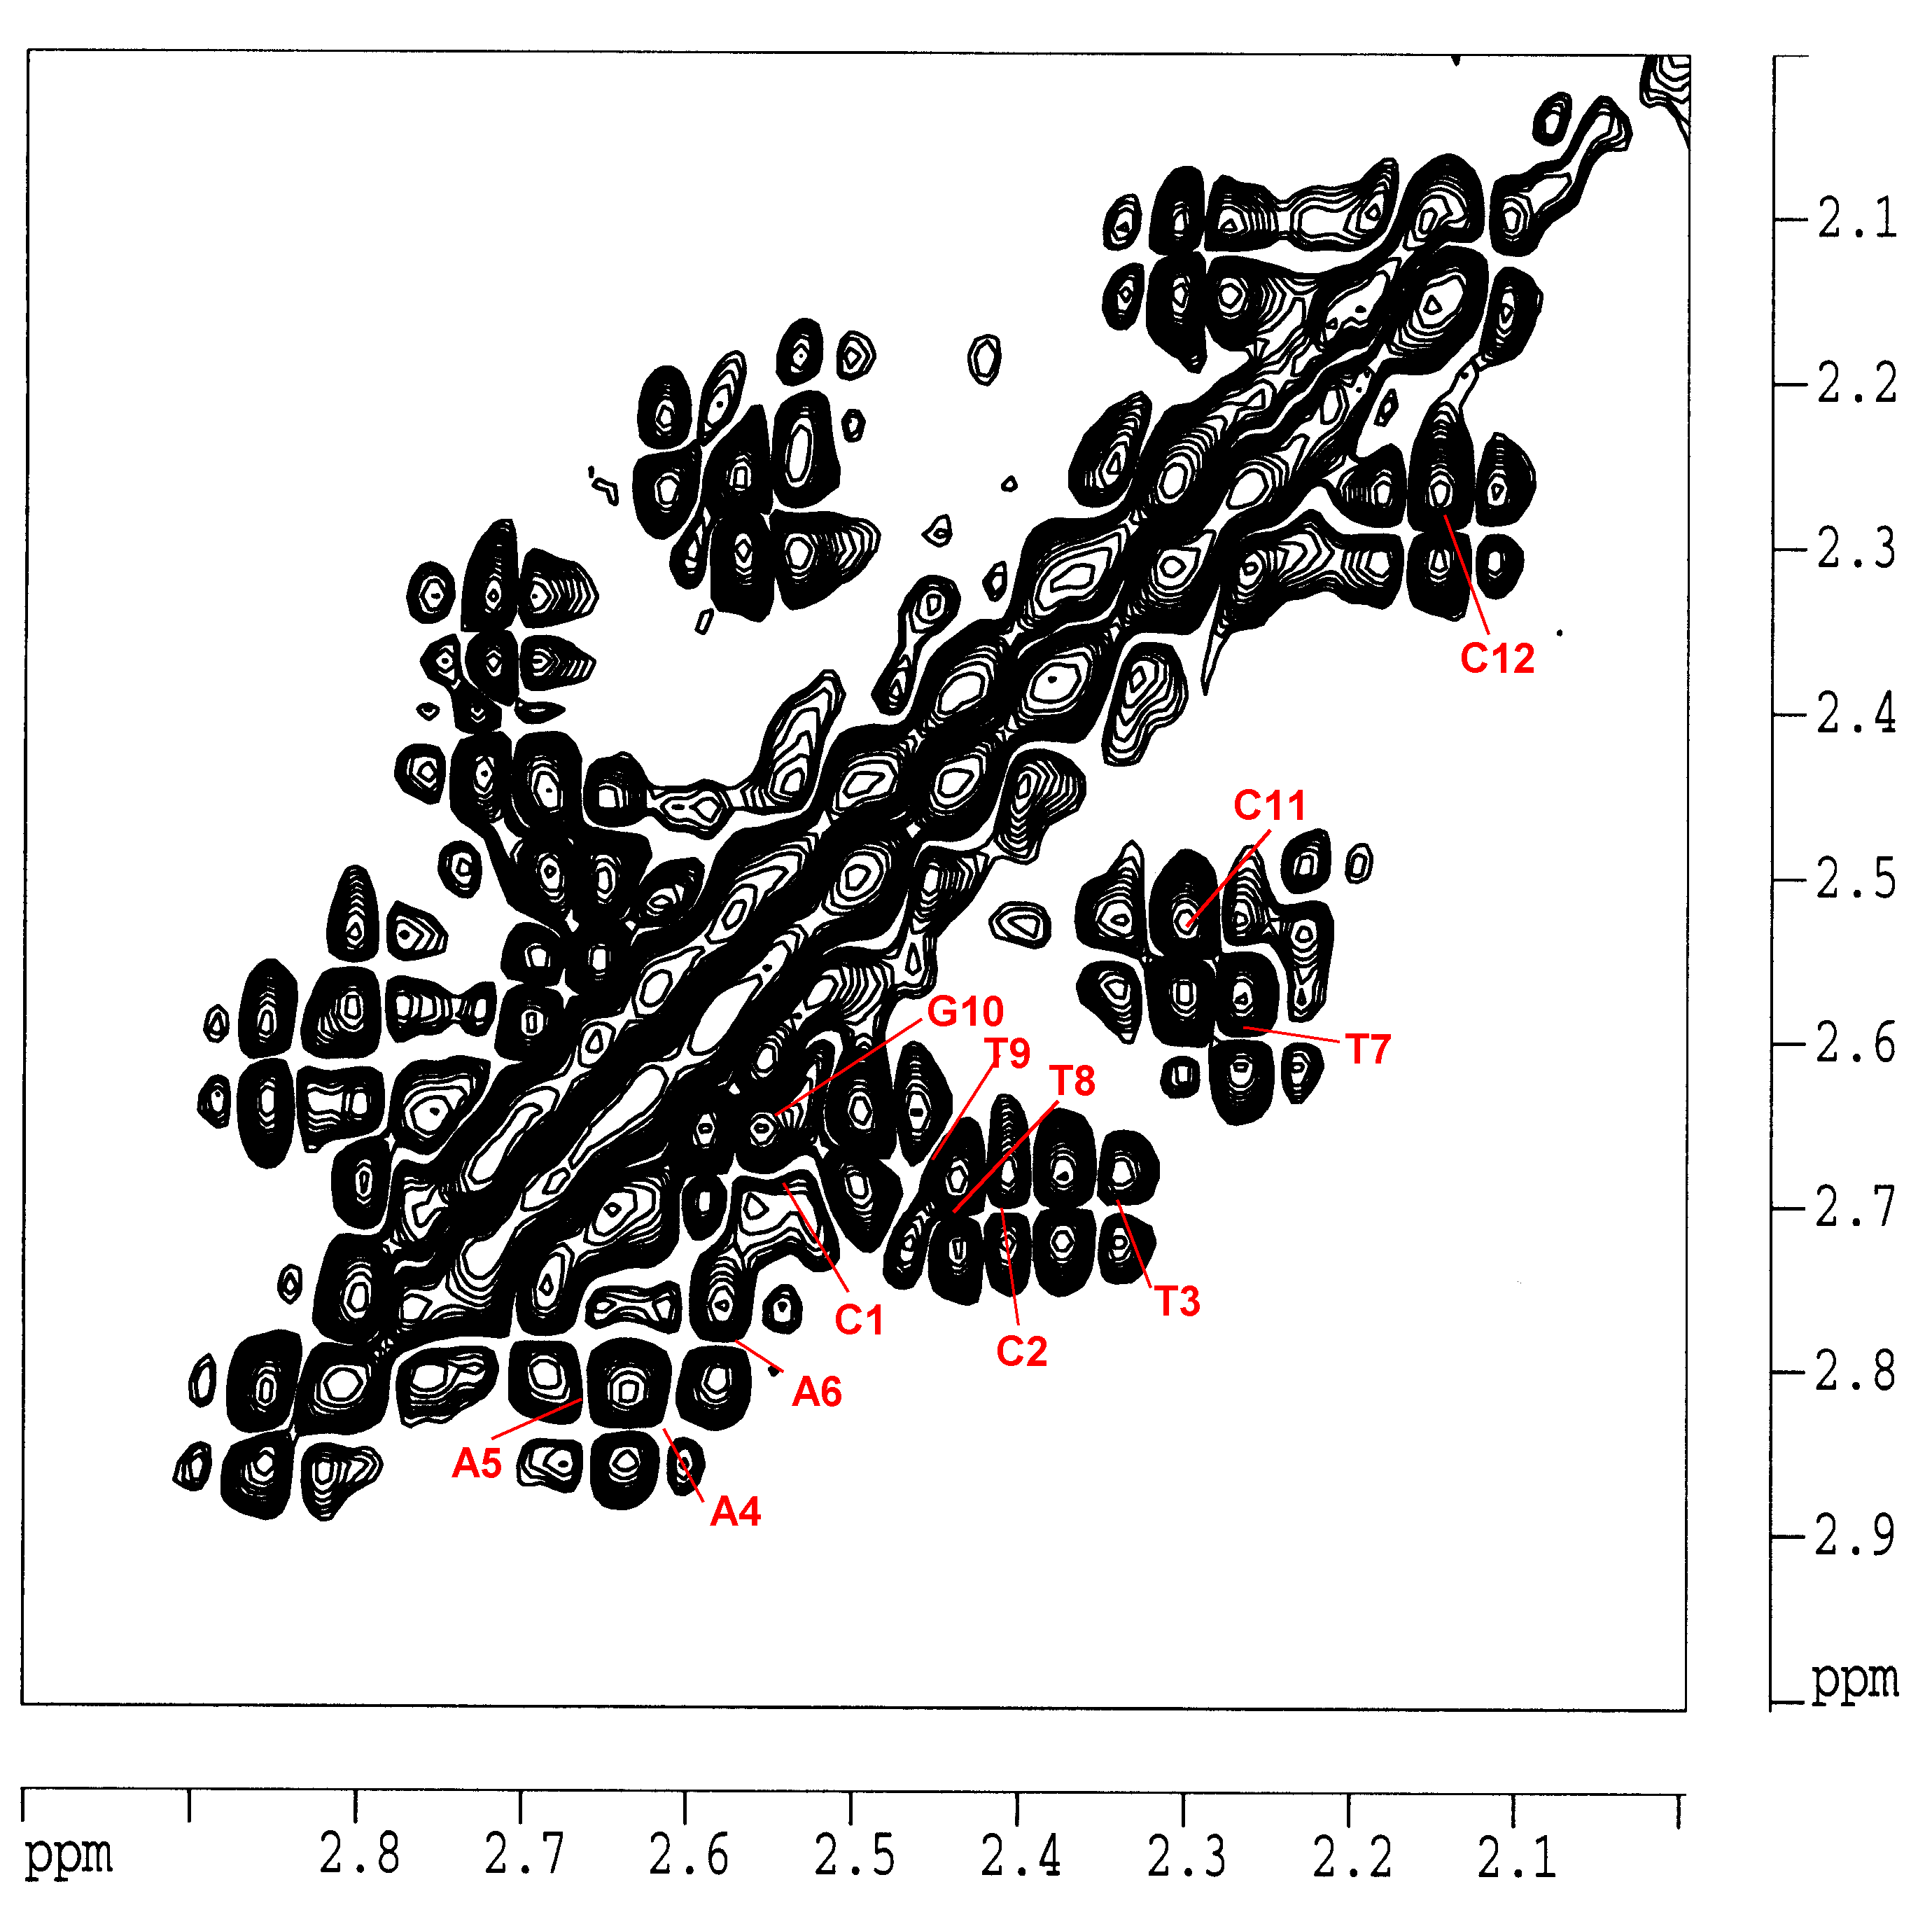

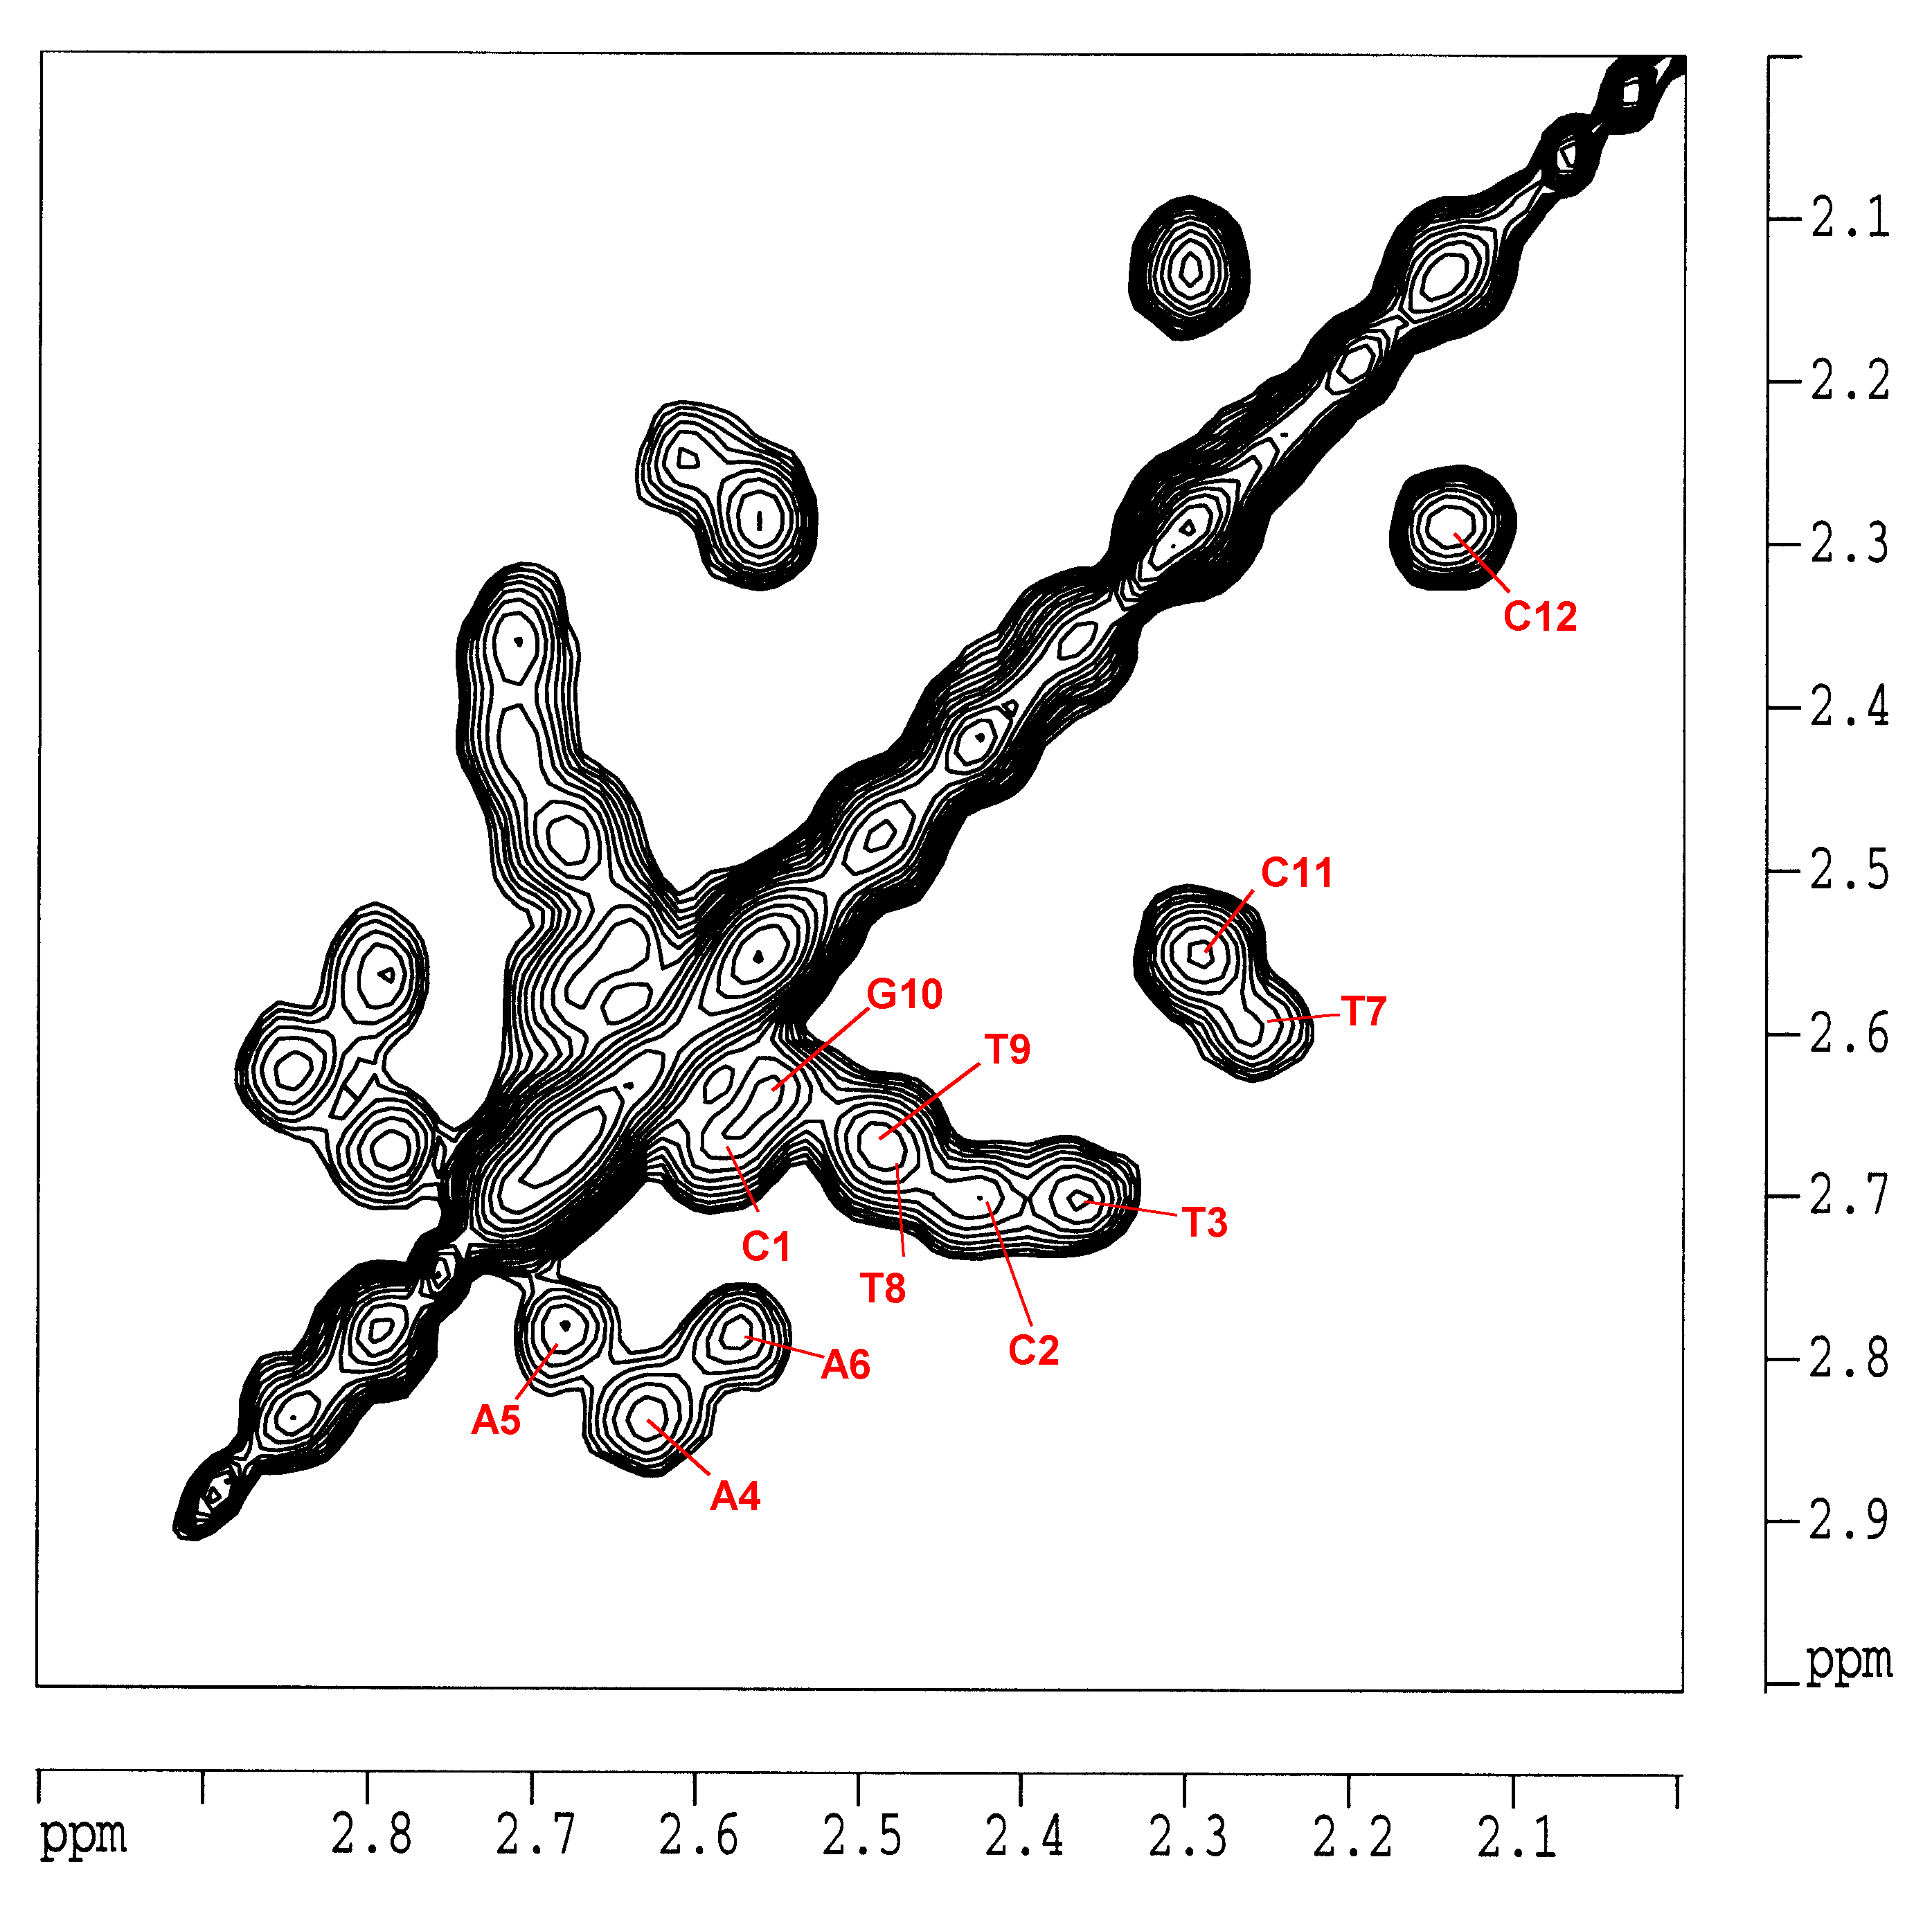


**Figure S4.** H2’/H2”-H3’/H4’ region of 500 MHz TOCSY spectrum of (**A**) the non-modified and (**B**) modified system. 3(4)Xn’/3(4)Xn” represents the H3’(H4’) cross peak with the H2’/H2” protons of sugar Xn.

(**A**)

**
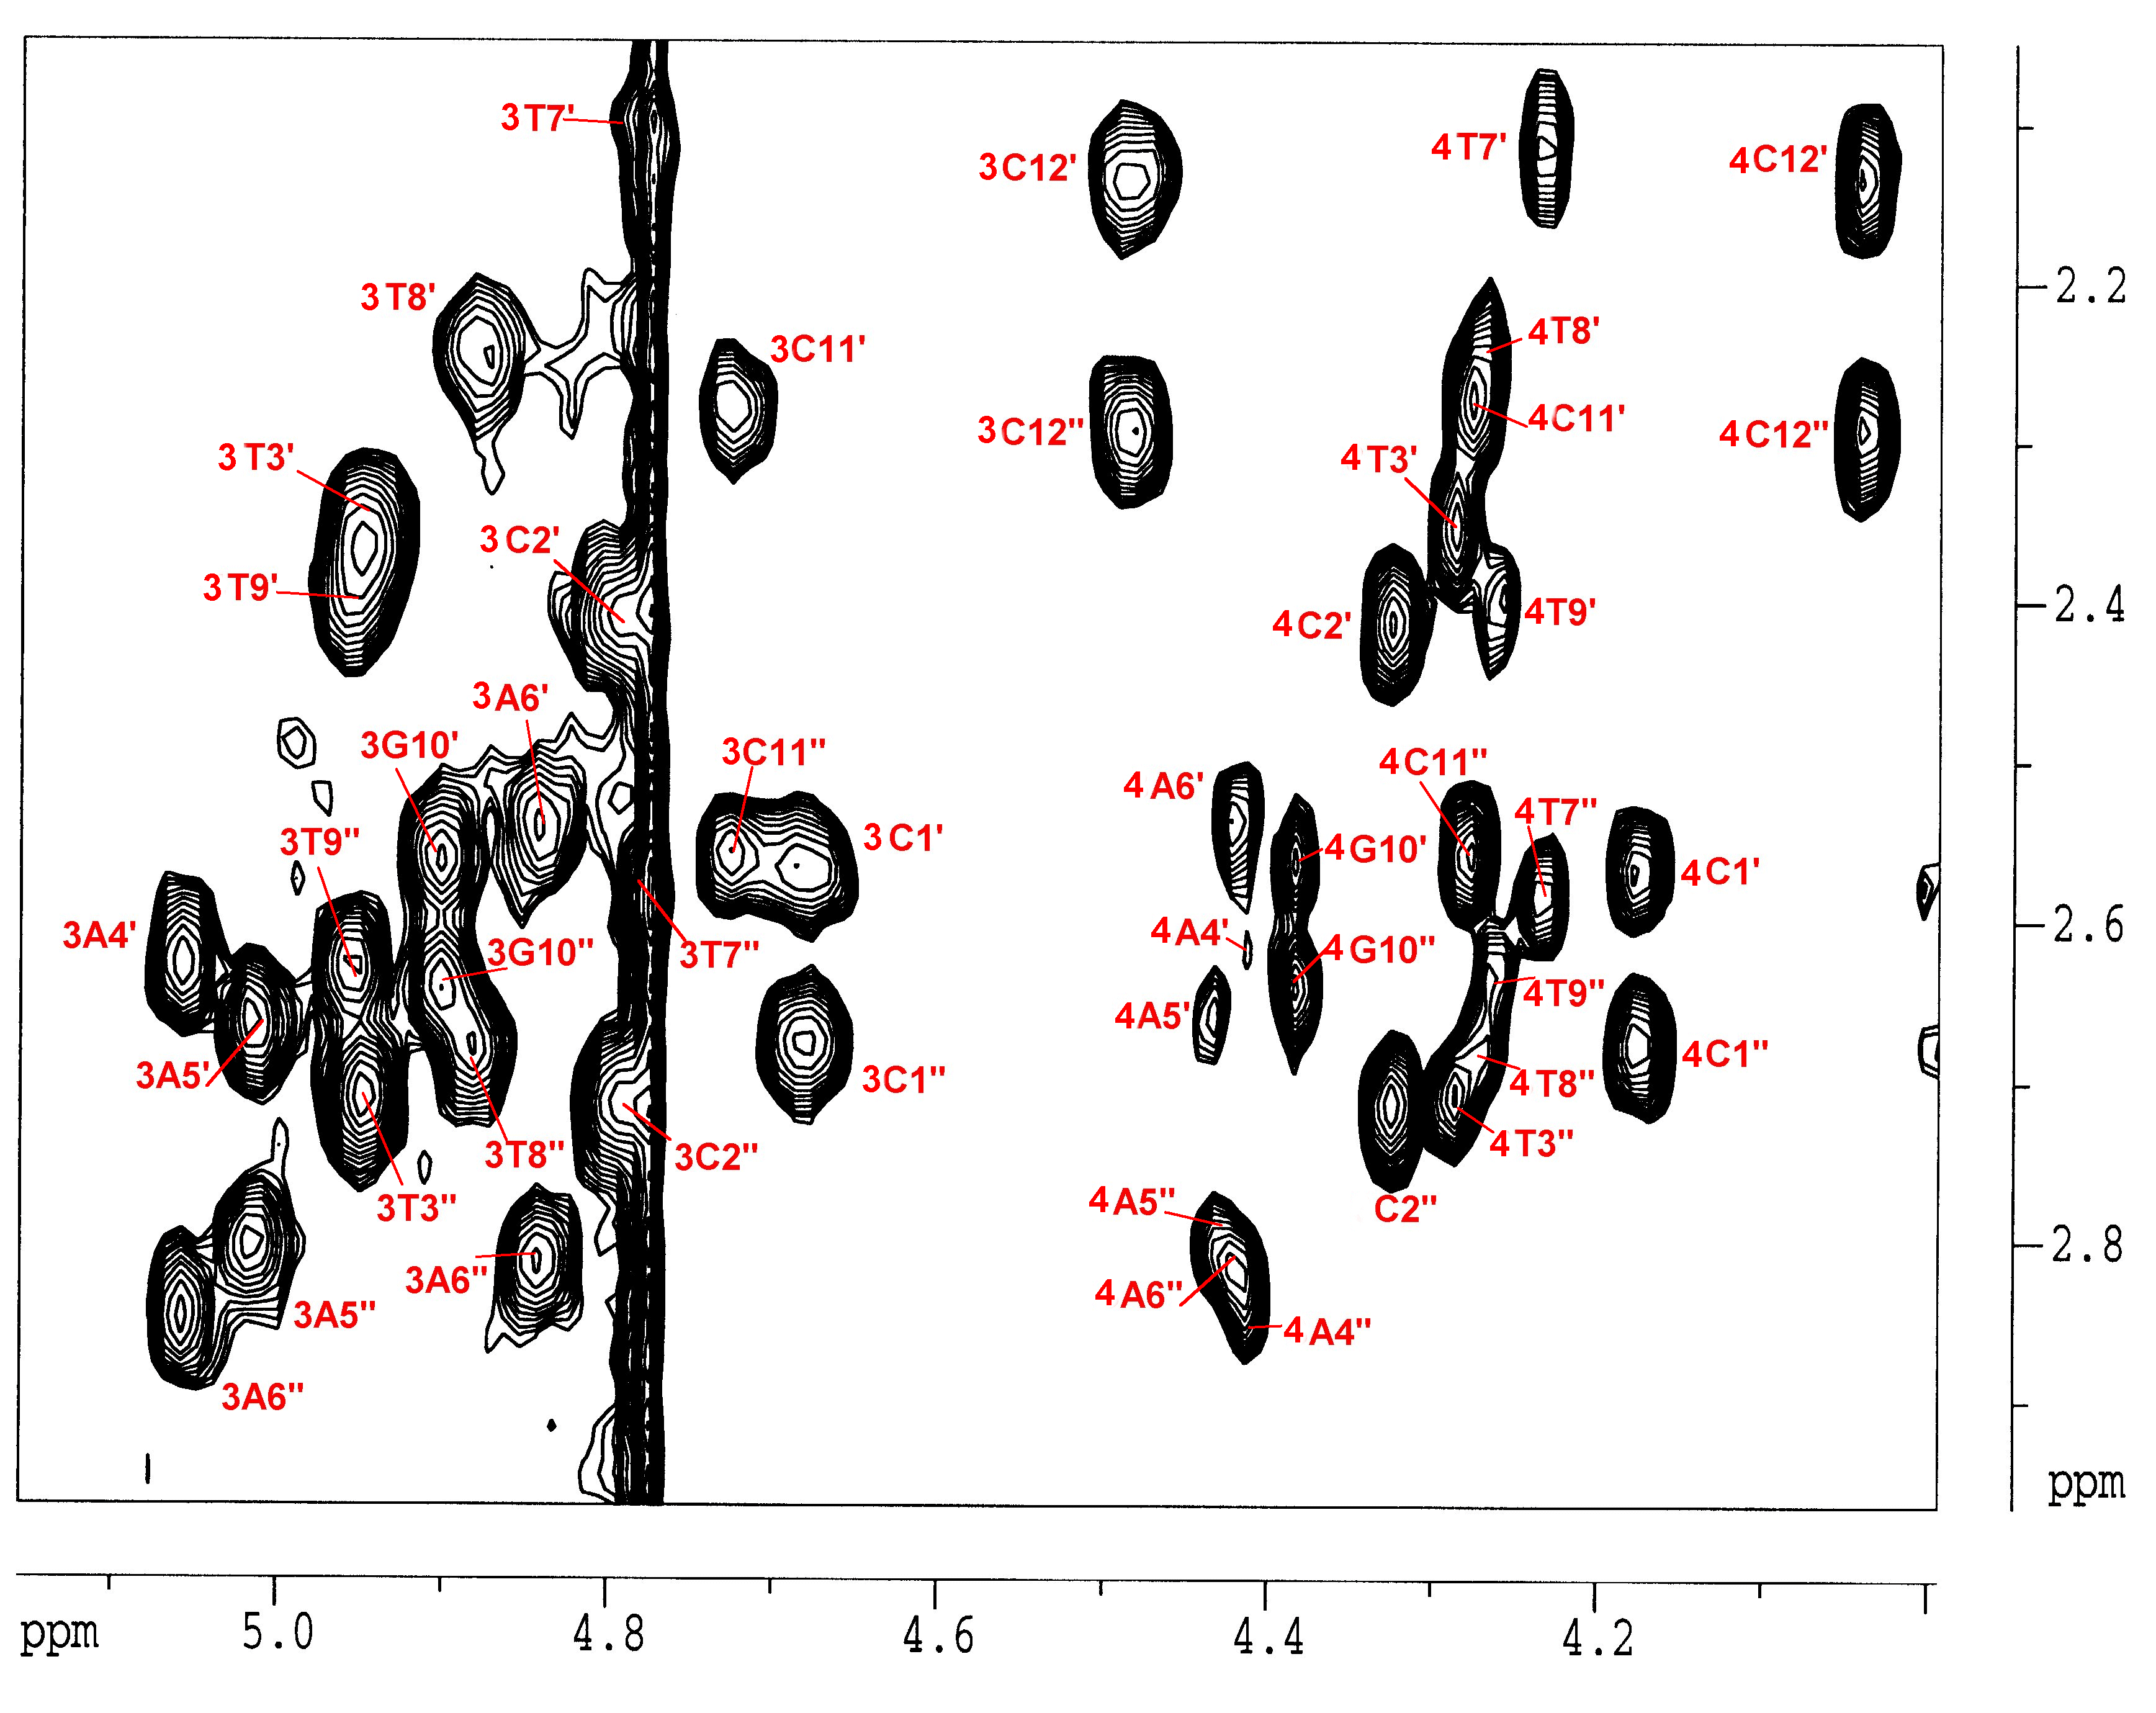
**

**(B)**


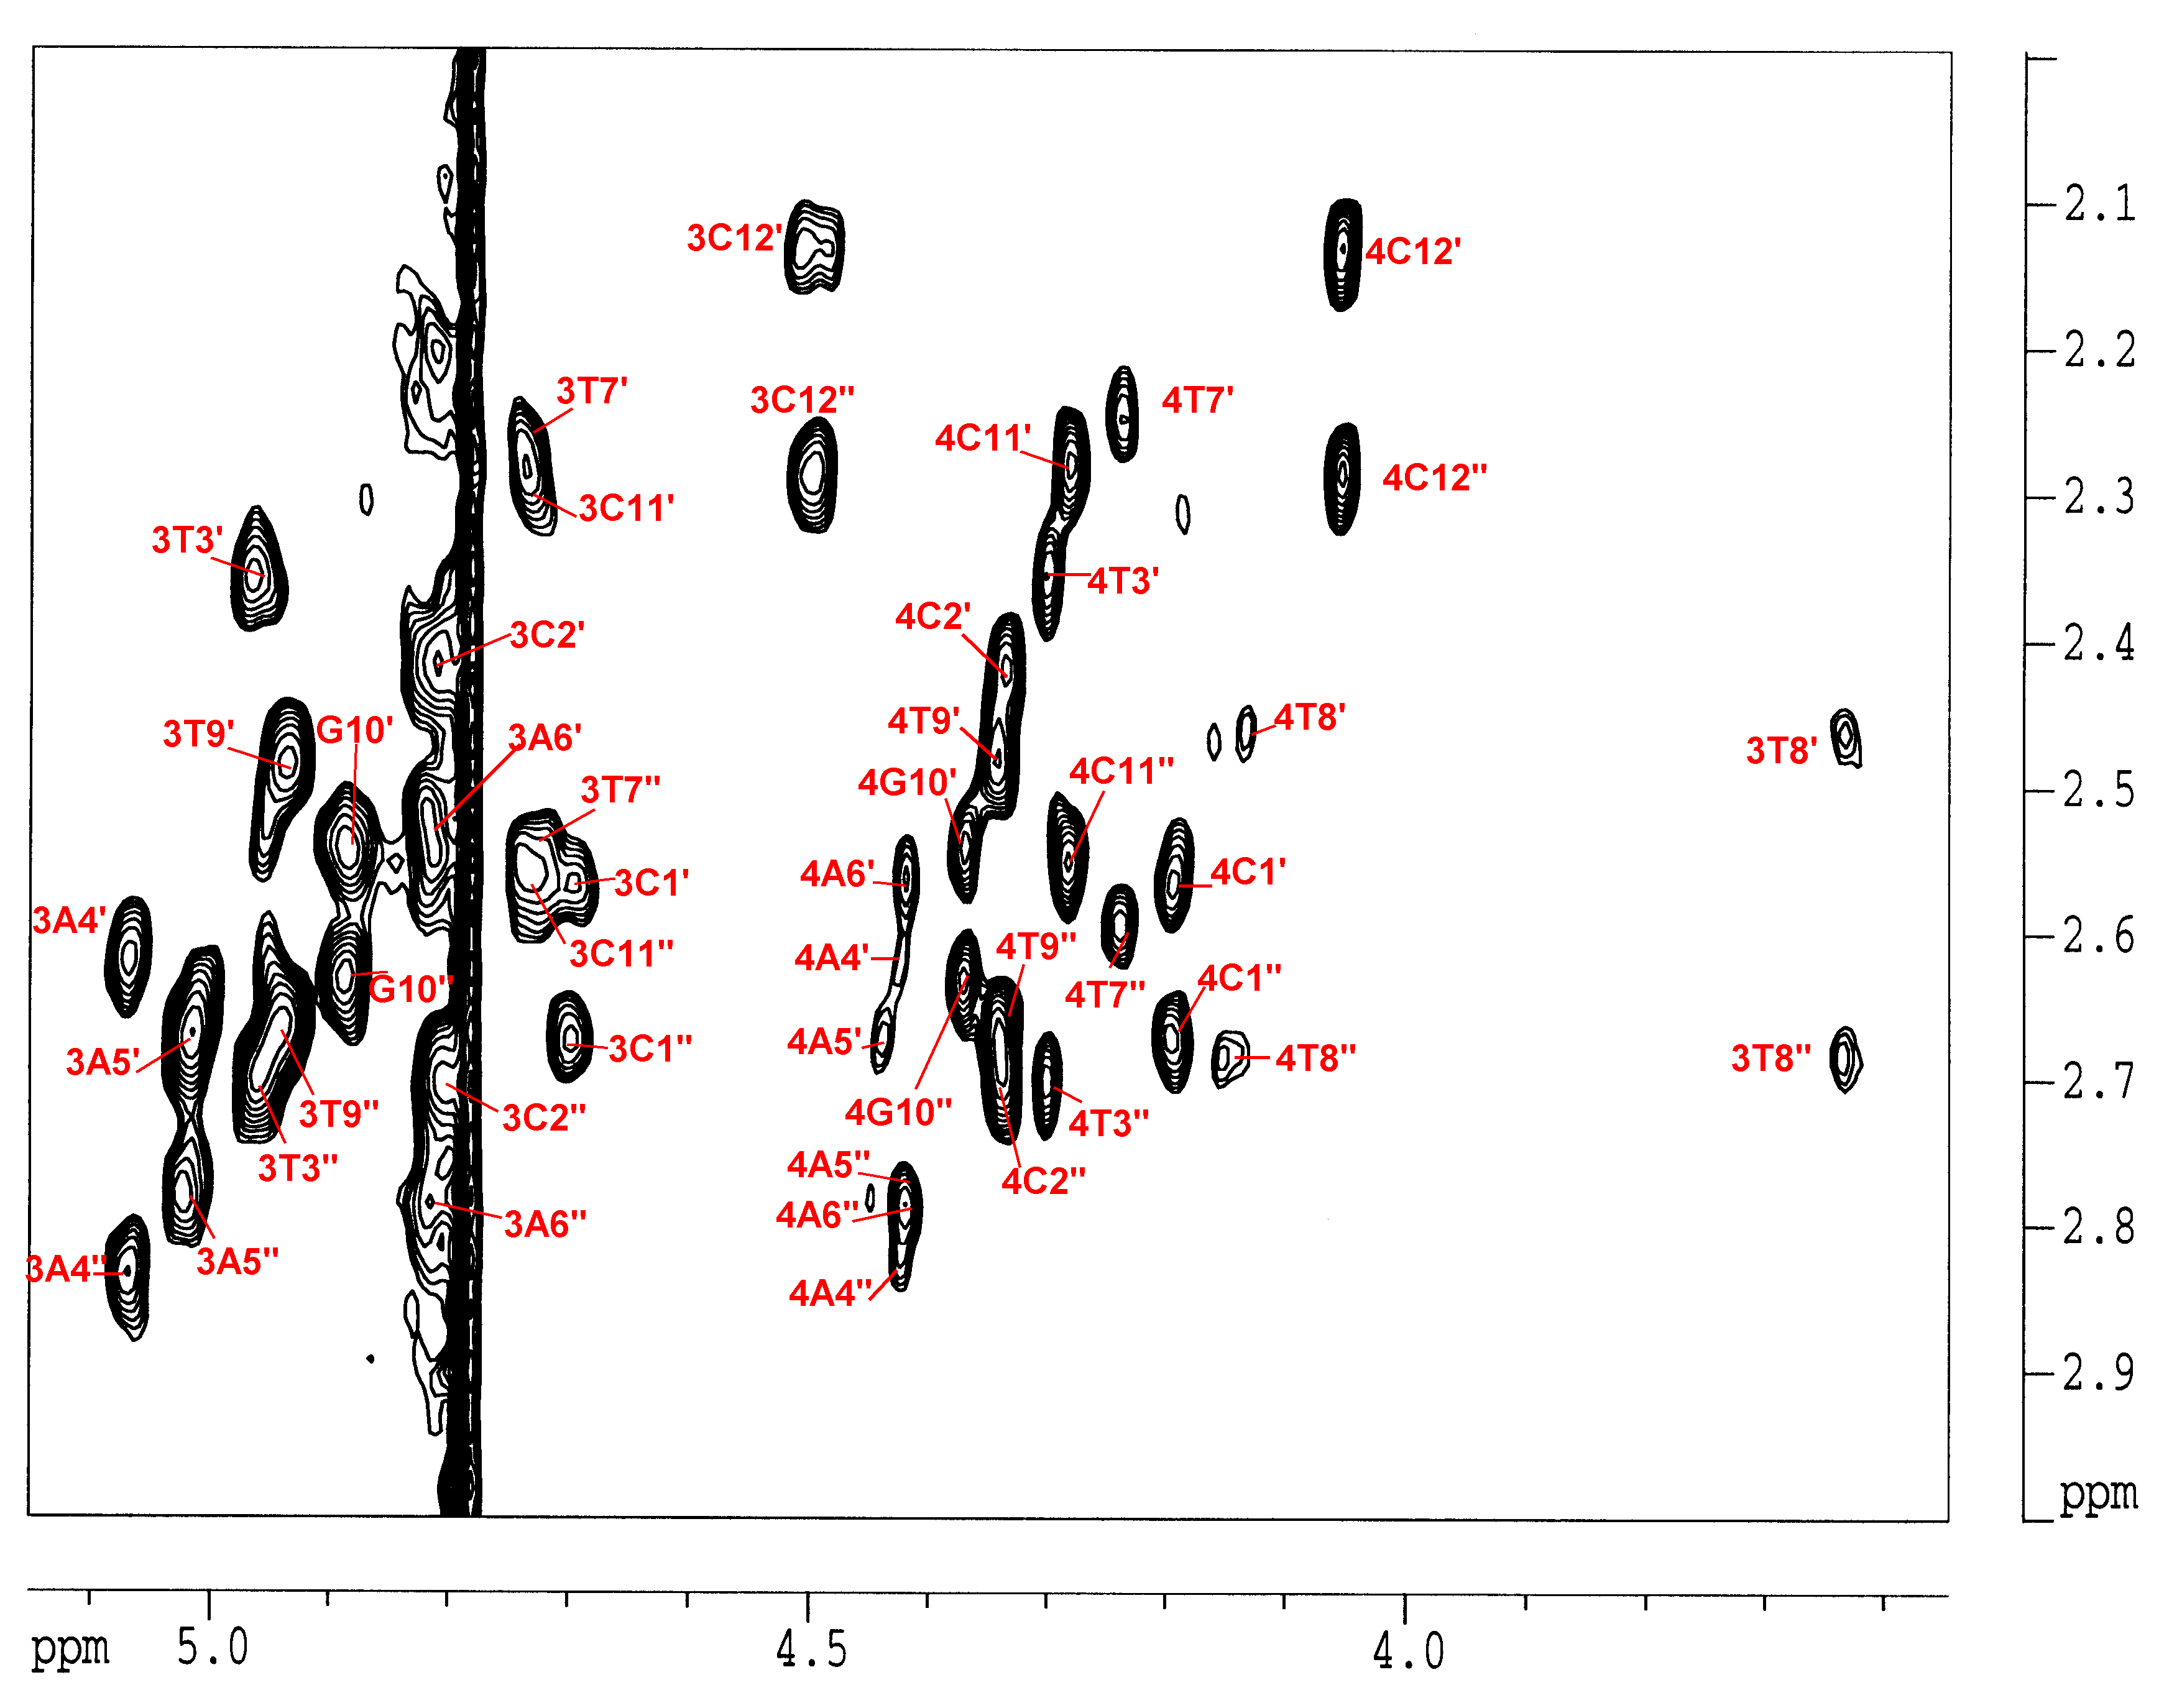


**Figure S5. (i)** TMe-H3’/H4’ and (ii) TMe-H1’ region of 500 MHz NOESY spectrum for (**A**) non-modified, and (**B**) modified systems.

**(Ai**) (**Aii**)

**
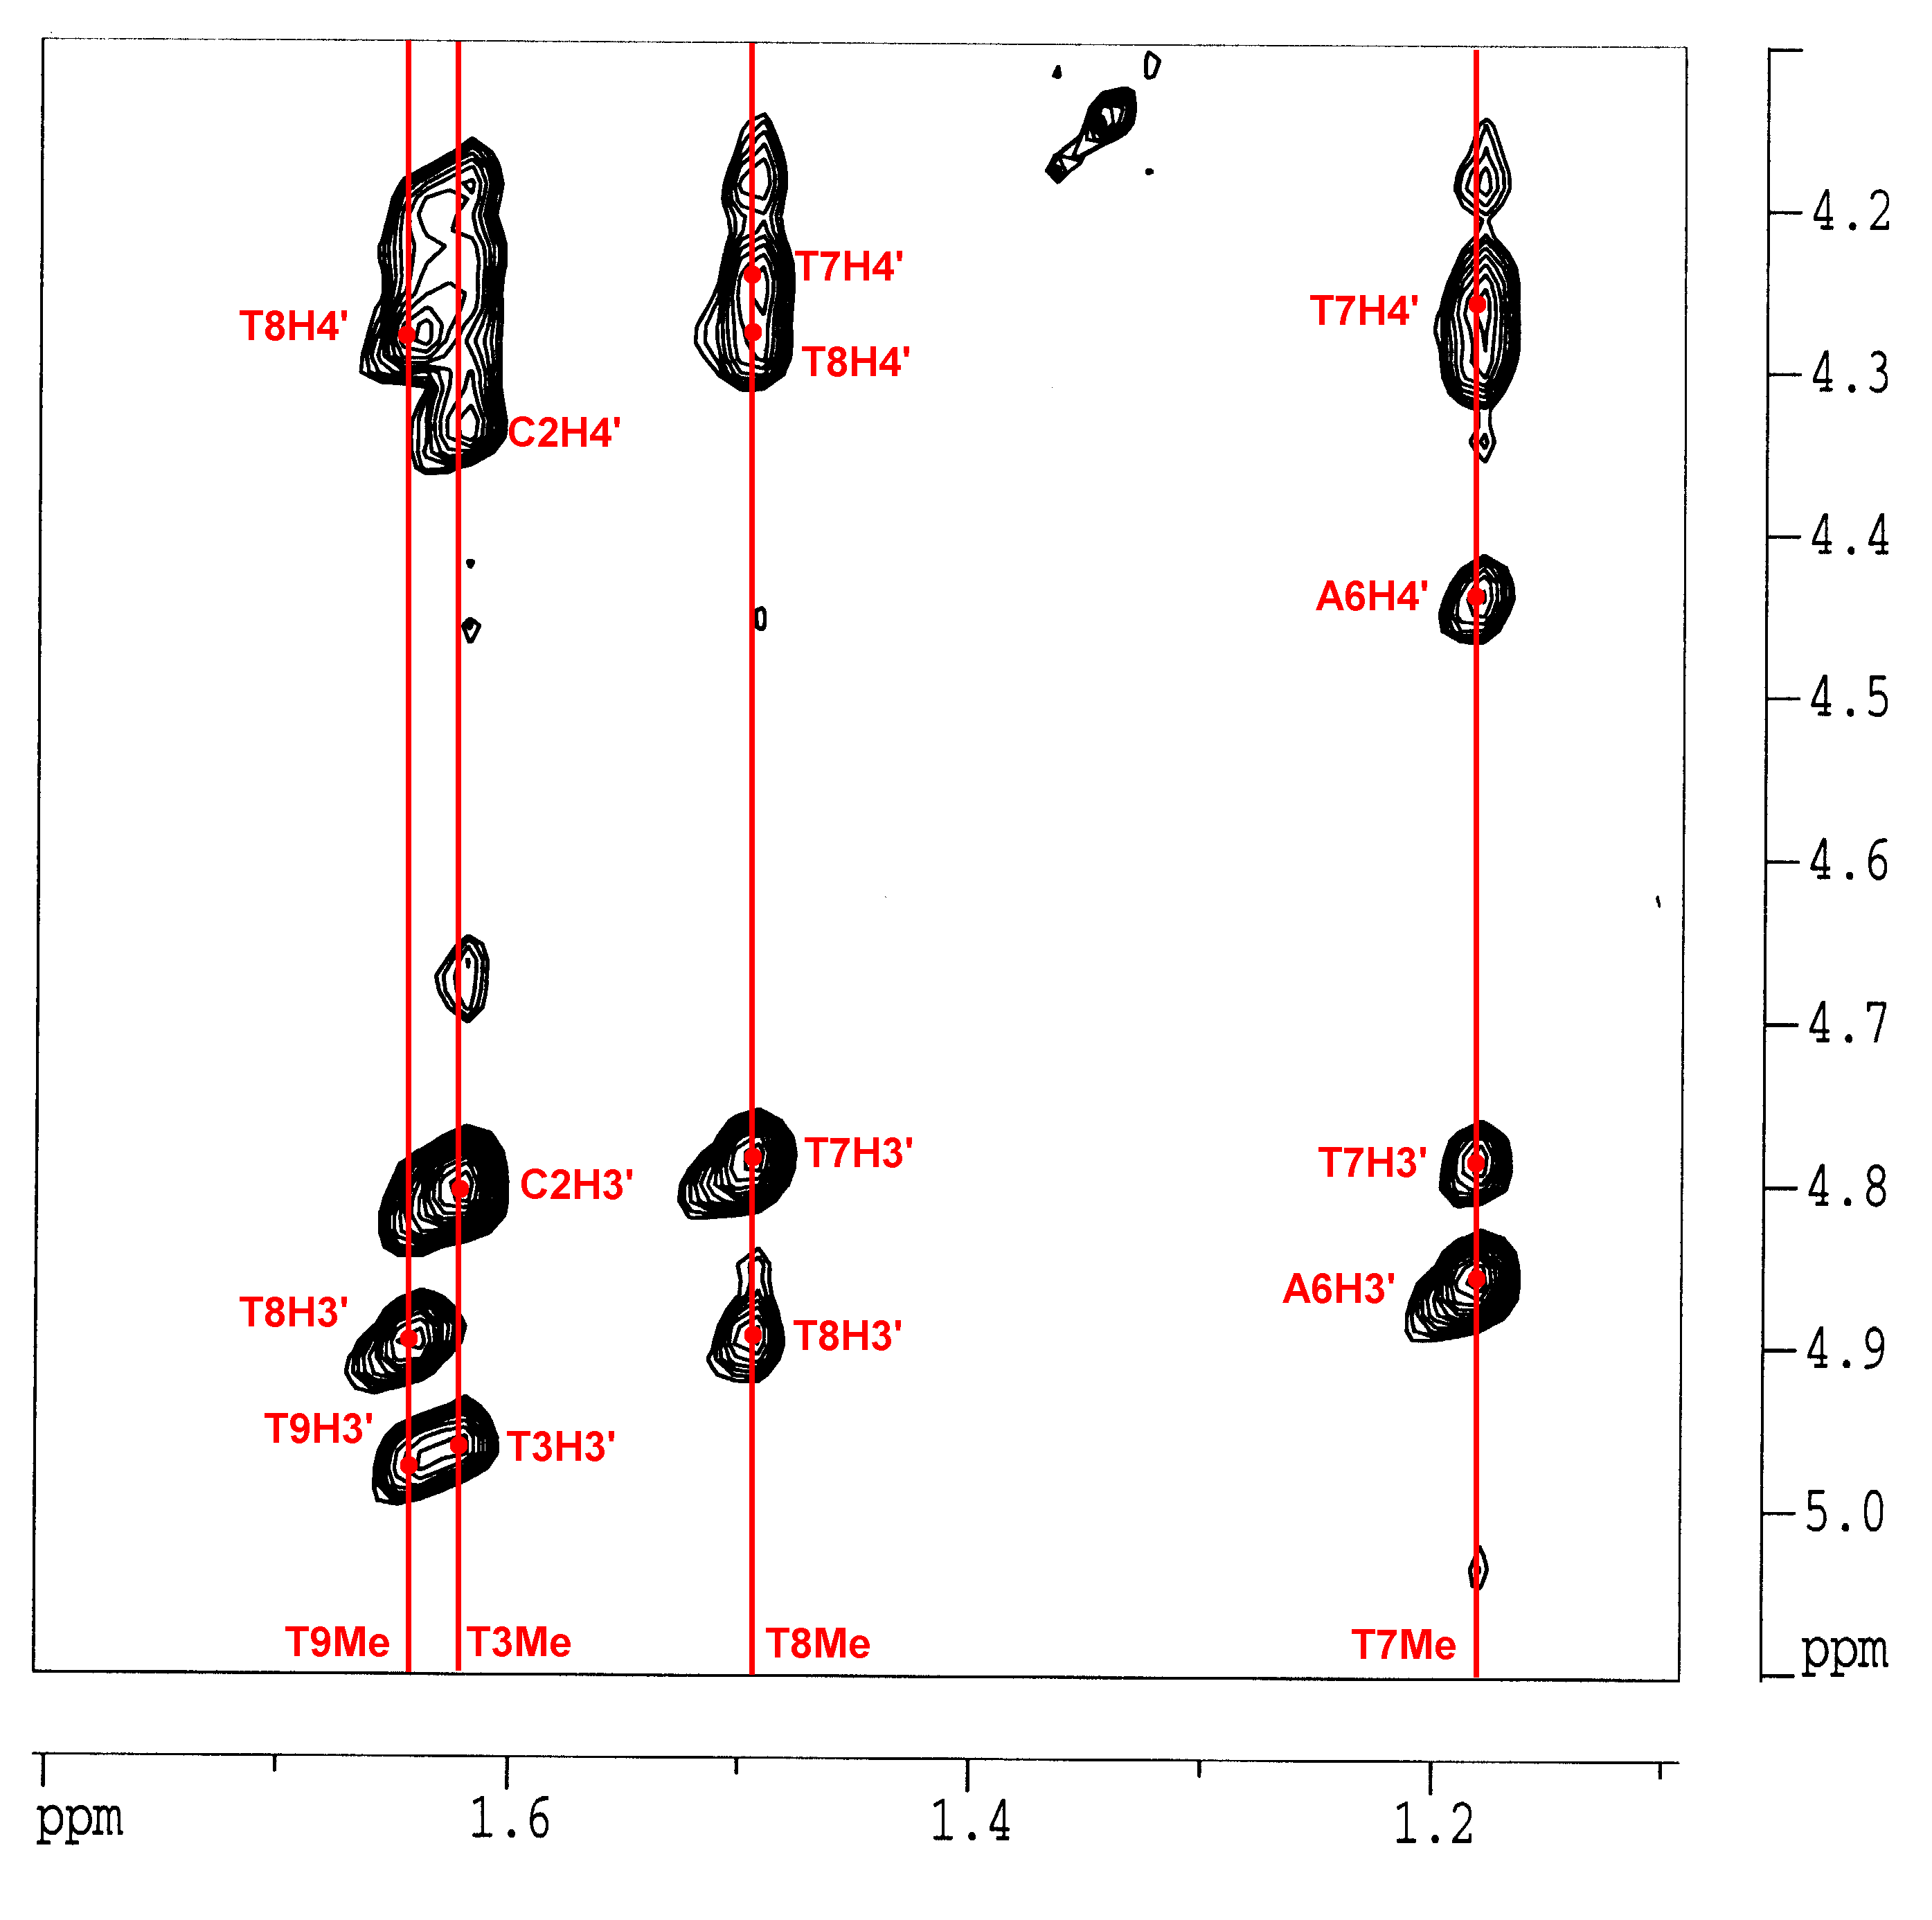

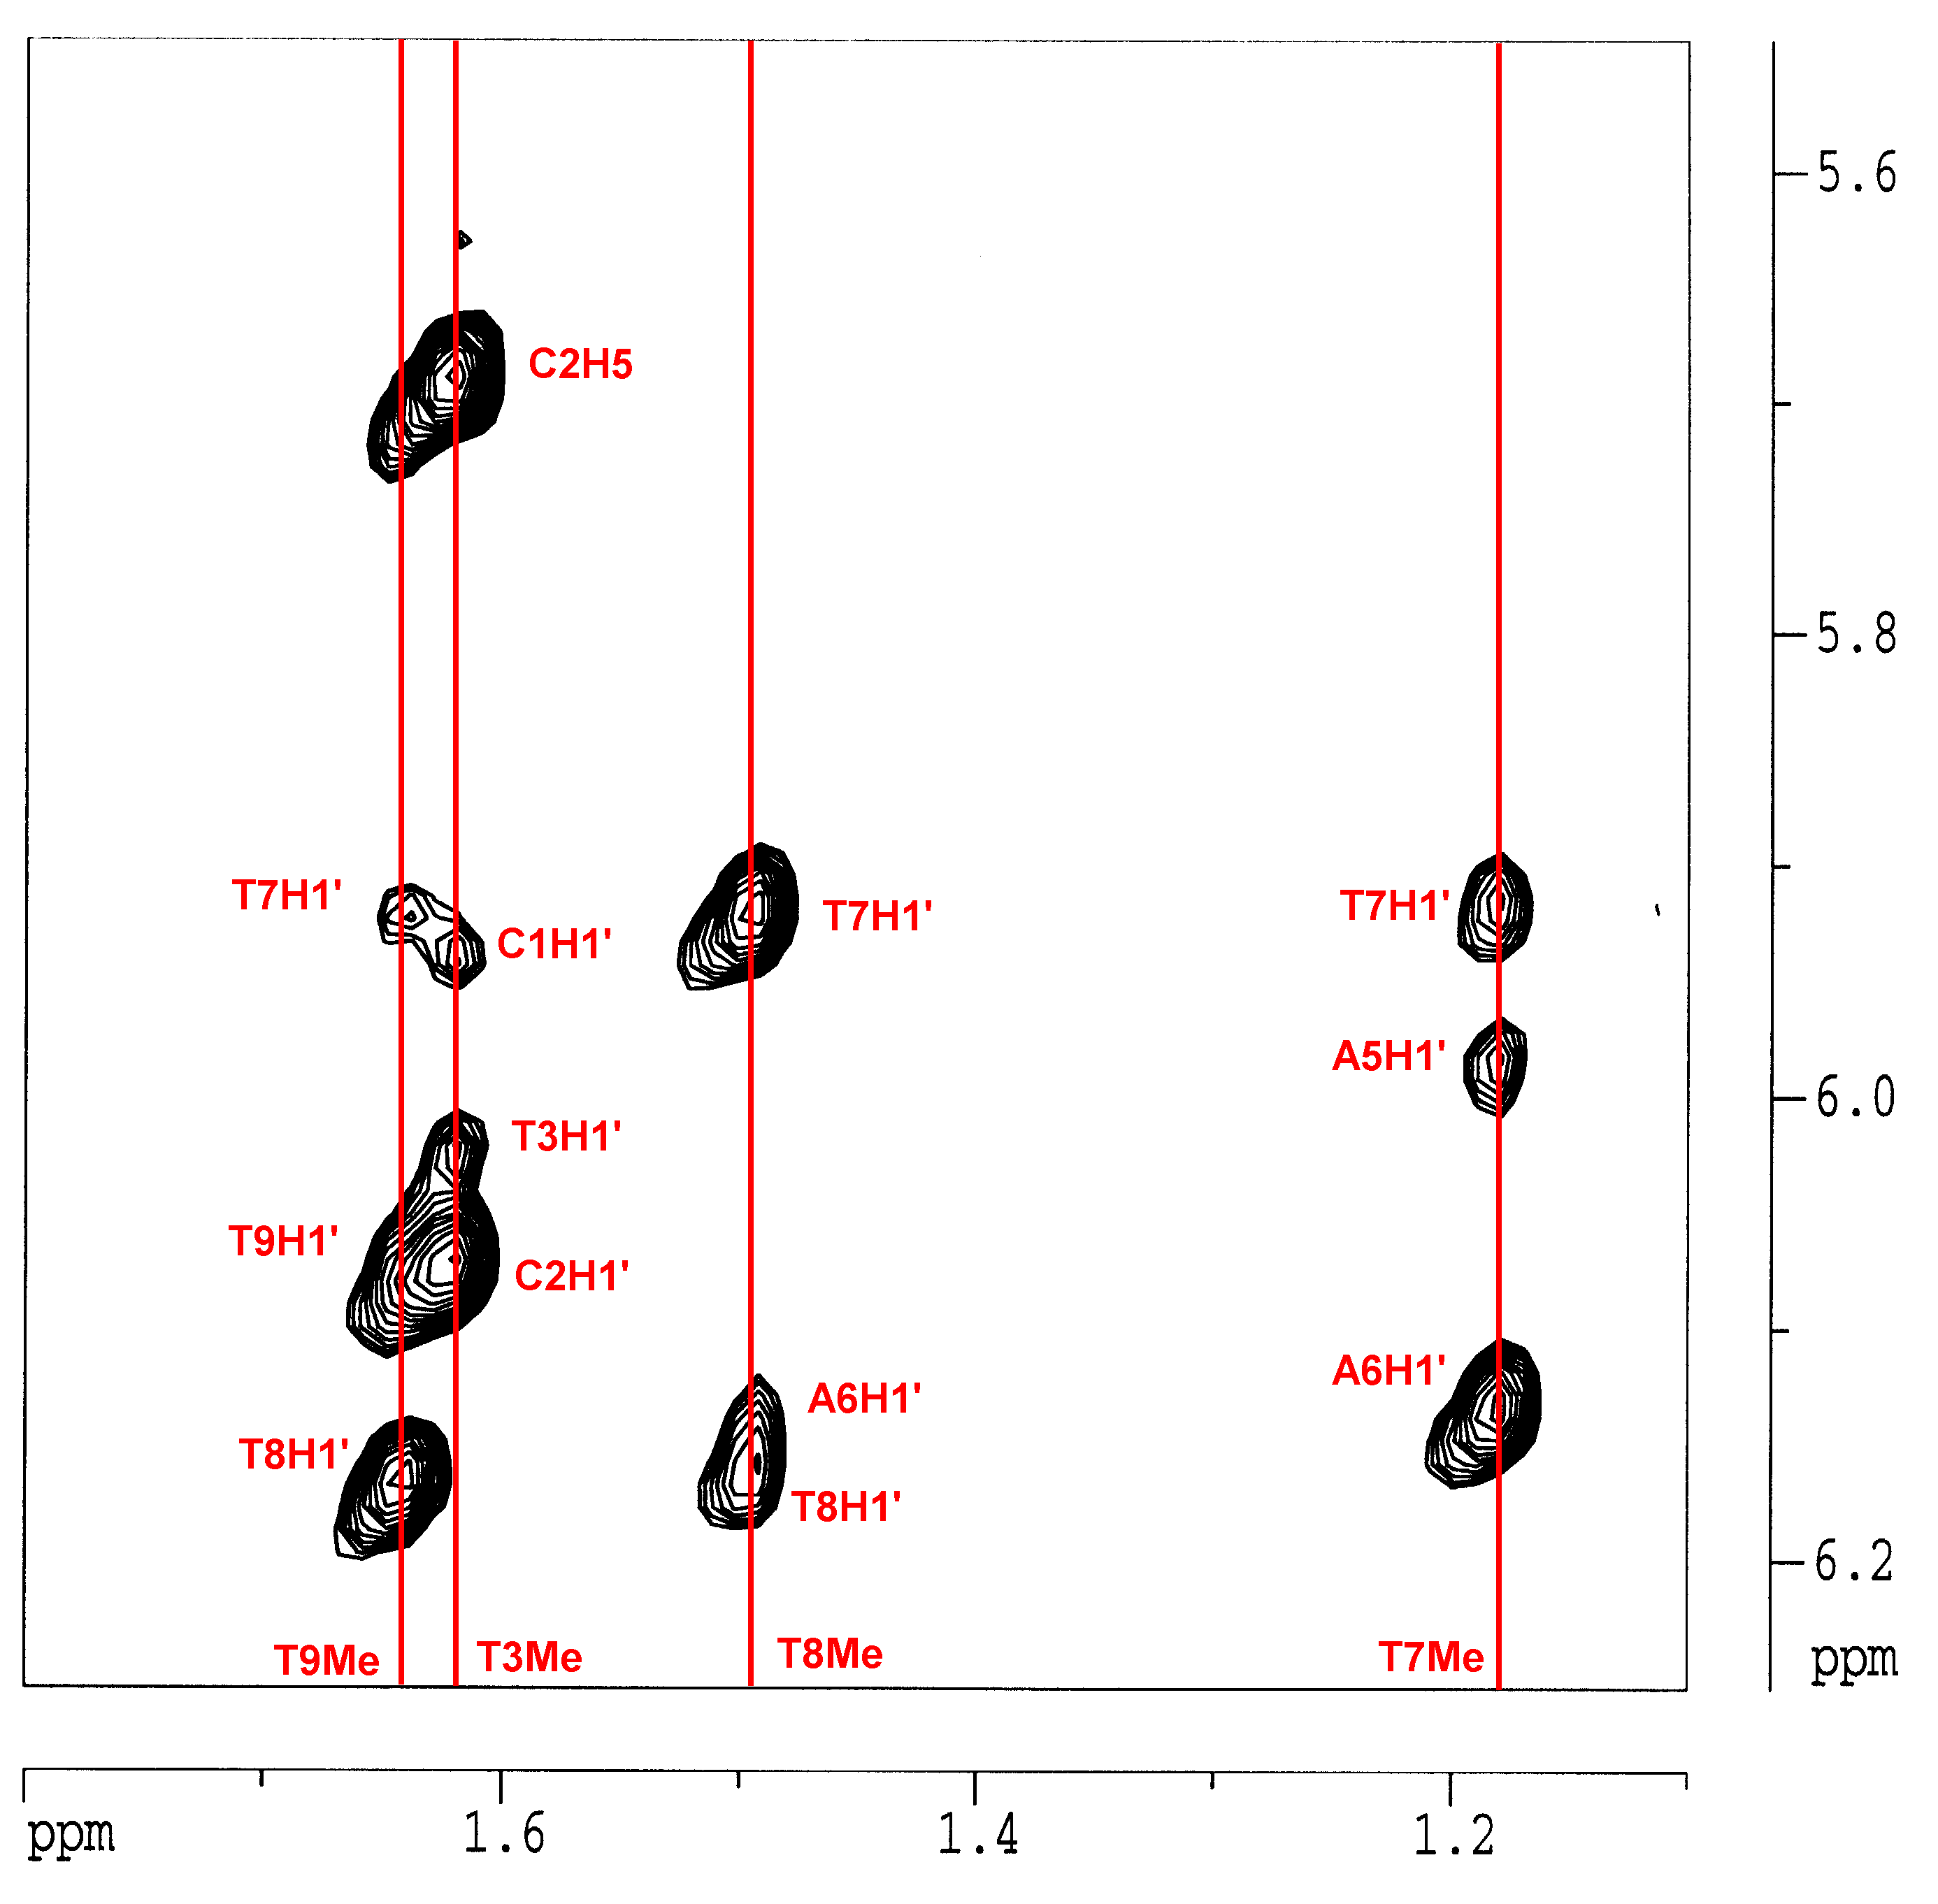
**

**(Bi) (Bii)**


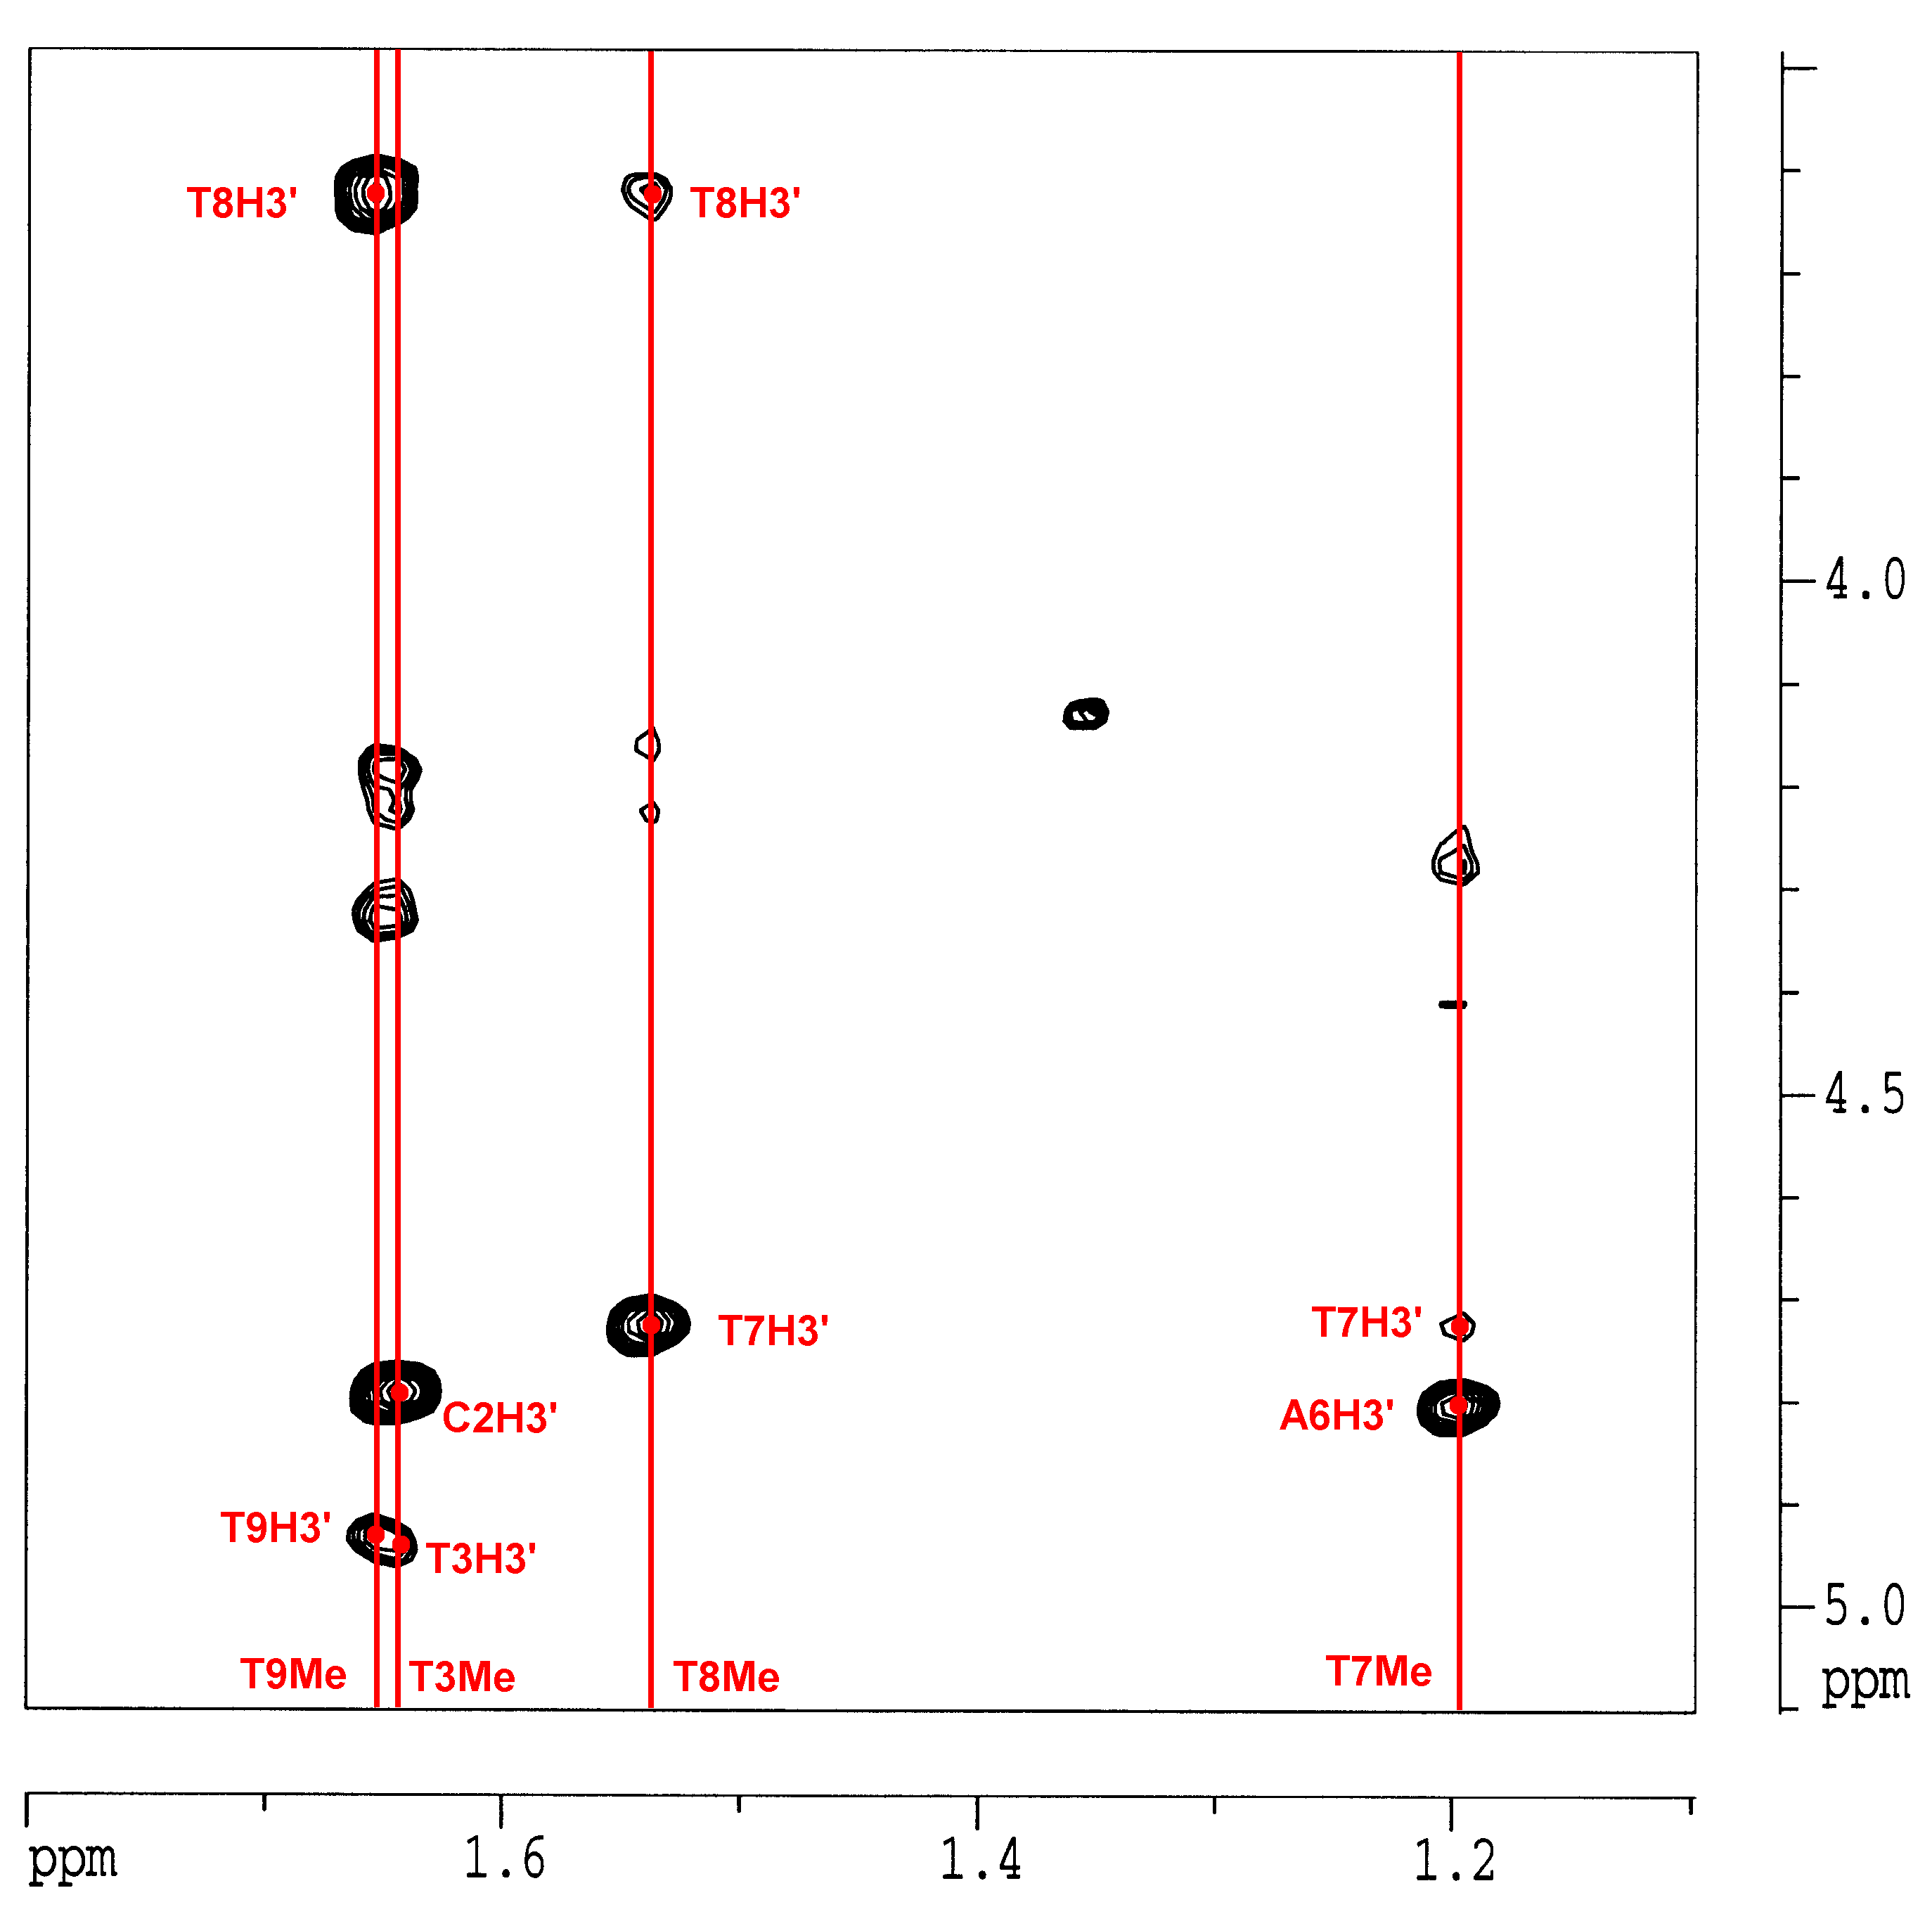

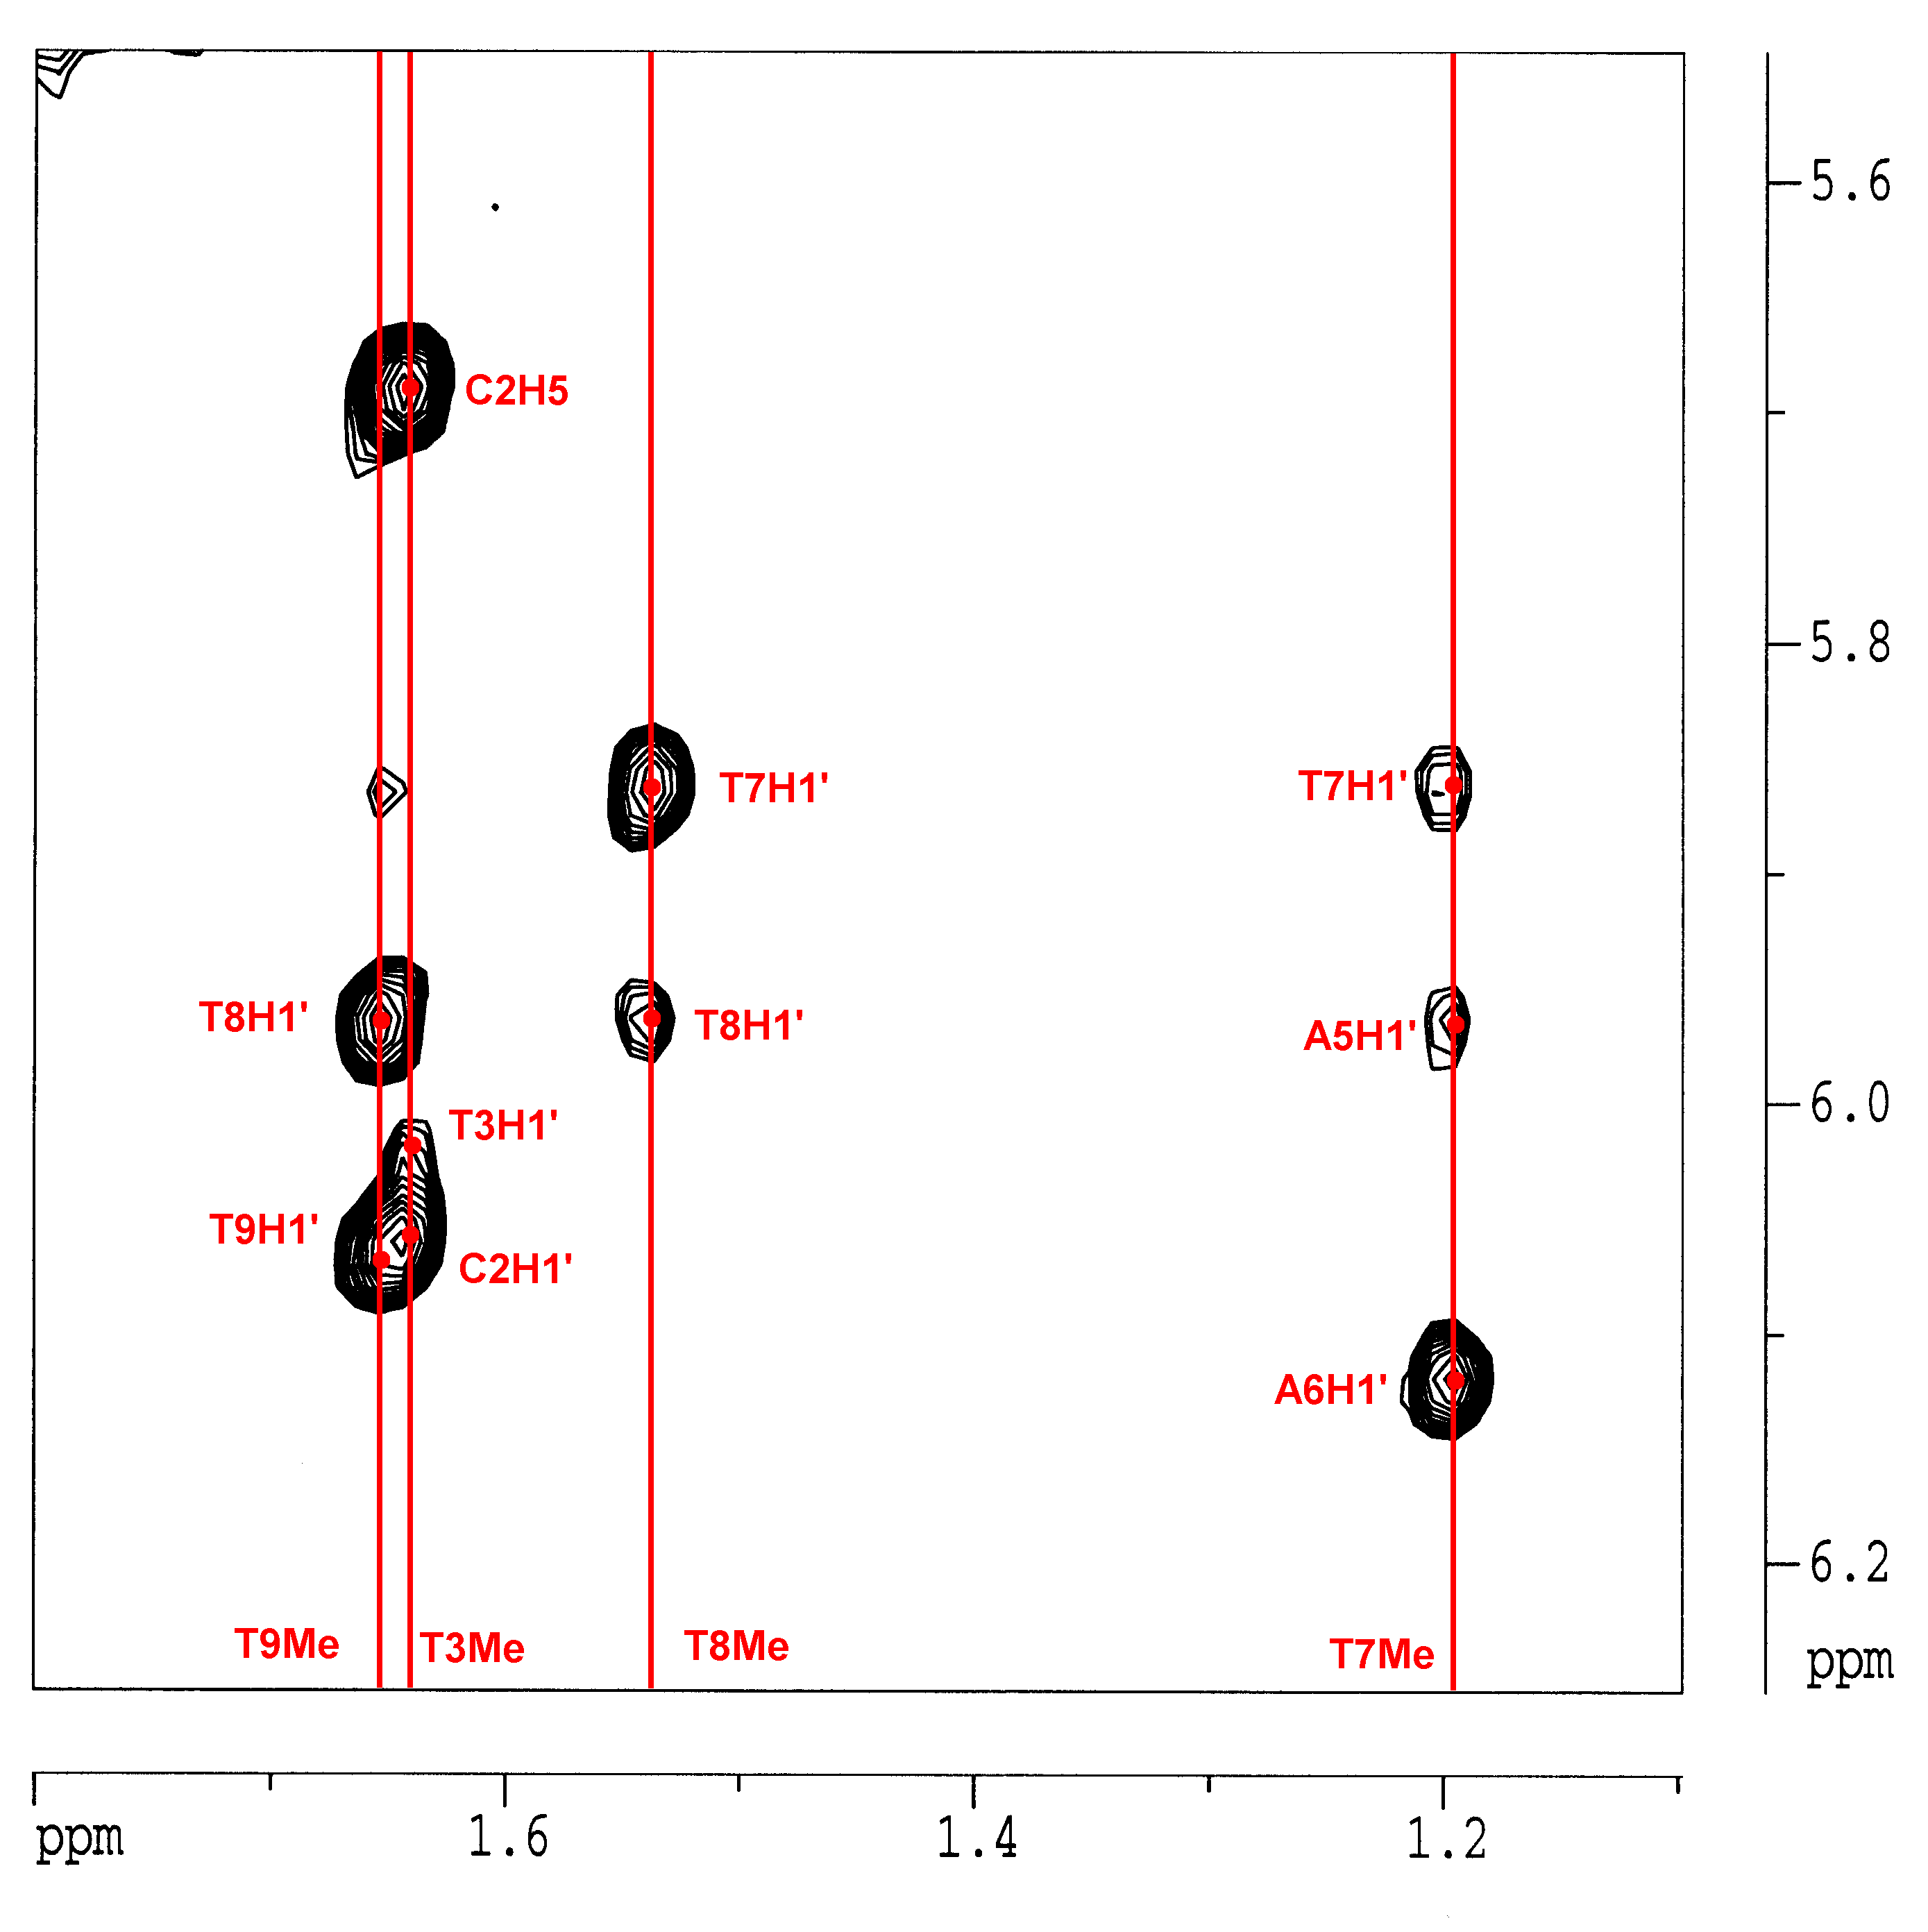


**Figure S6.** Expanded region of 500 MHz NOESY spectrum for (**A**) non-modified, and (**B**) modified systems. Xn represents AH2-XH1’ proton cross peaks

(A) (B)
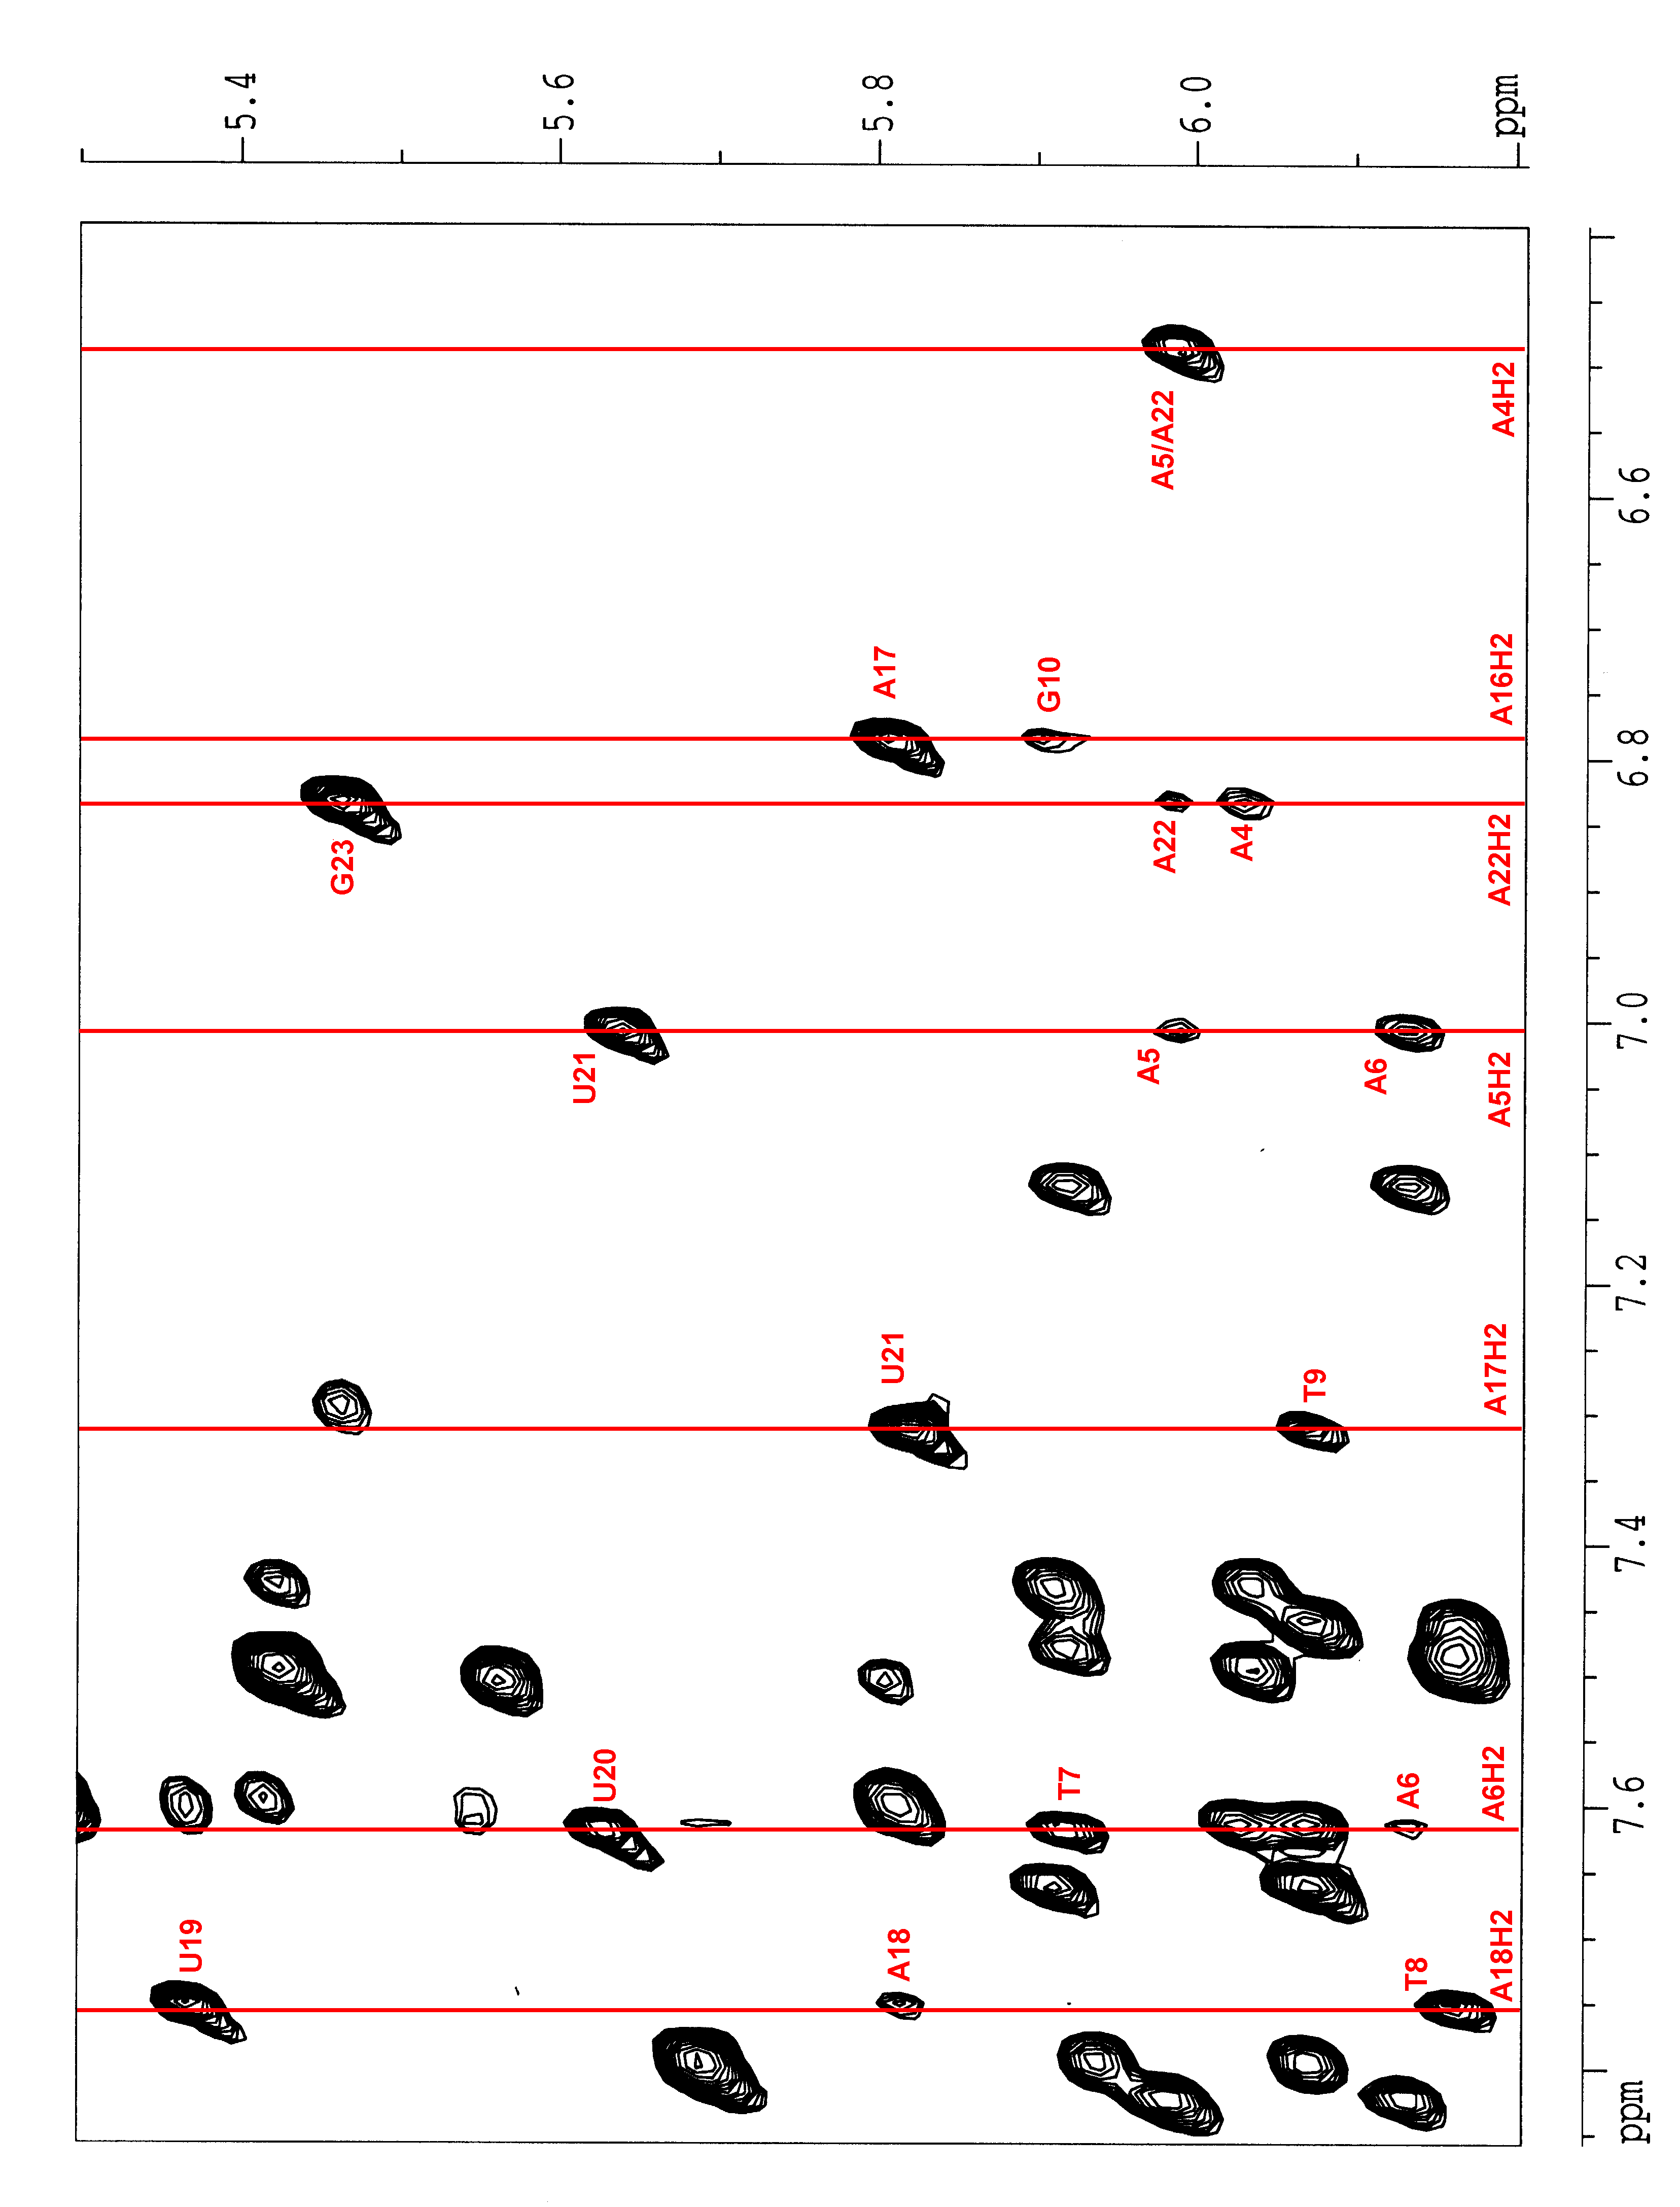

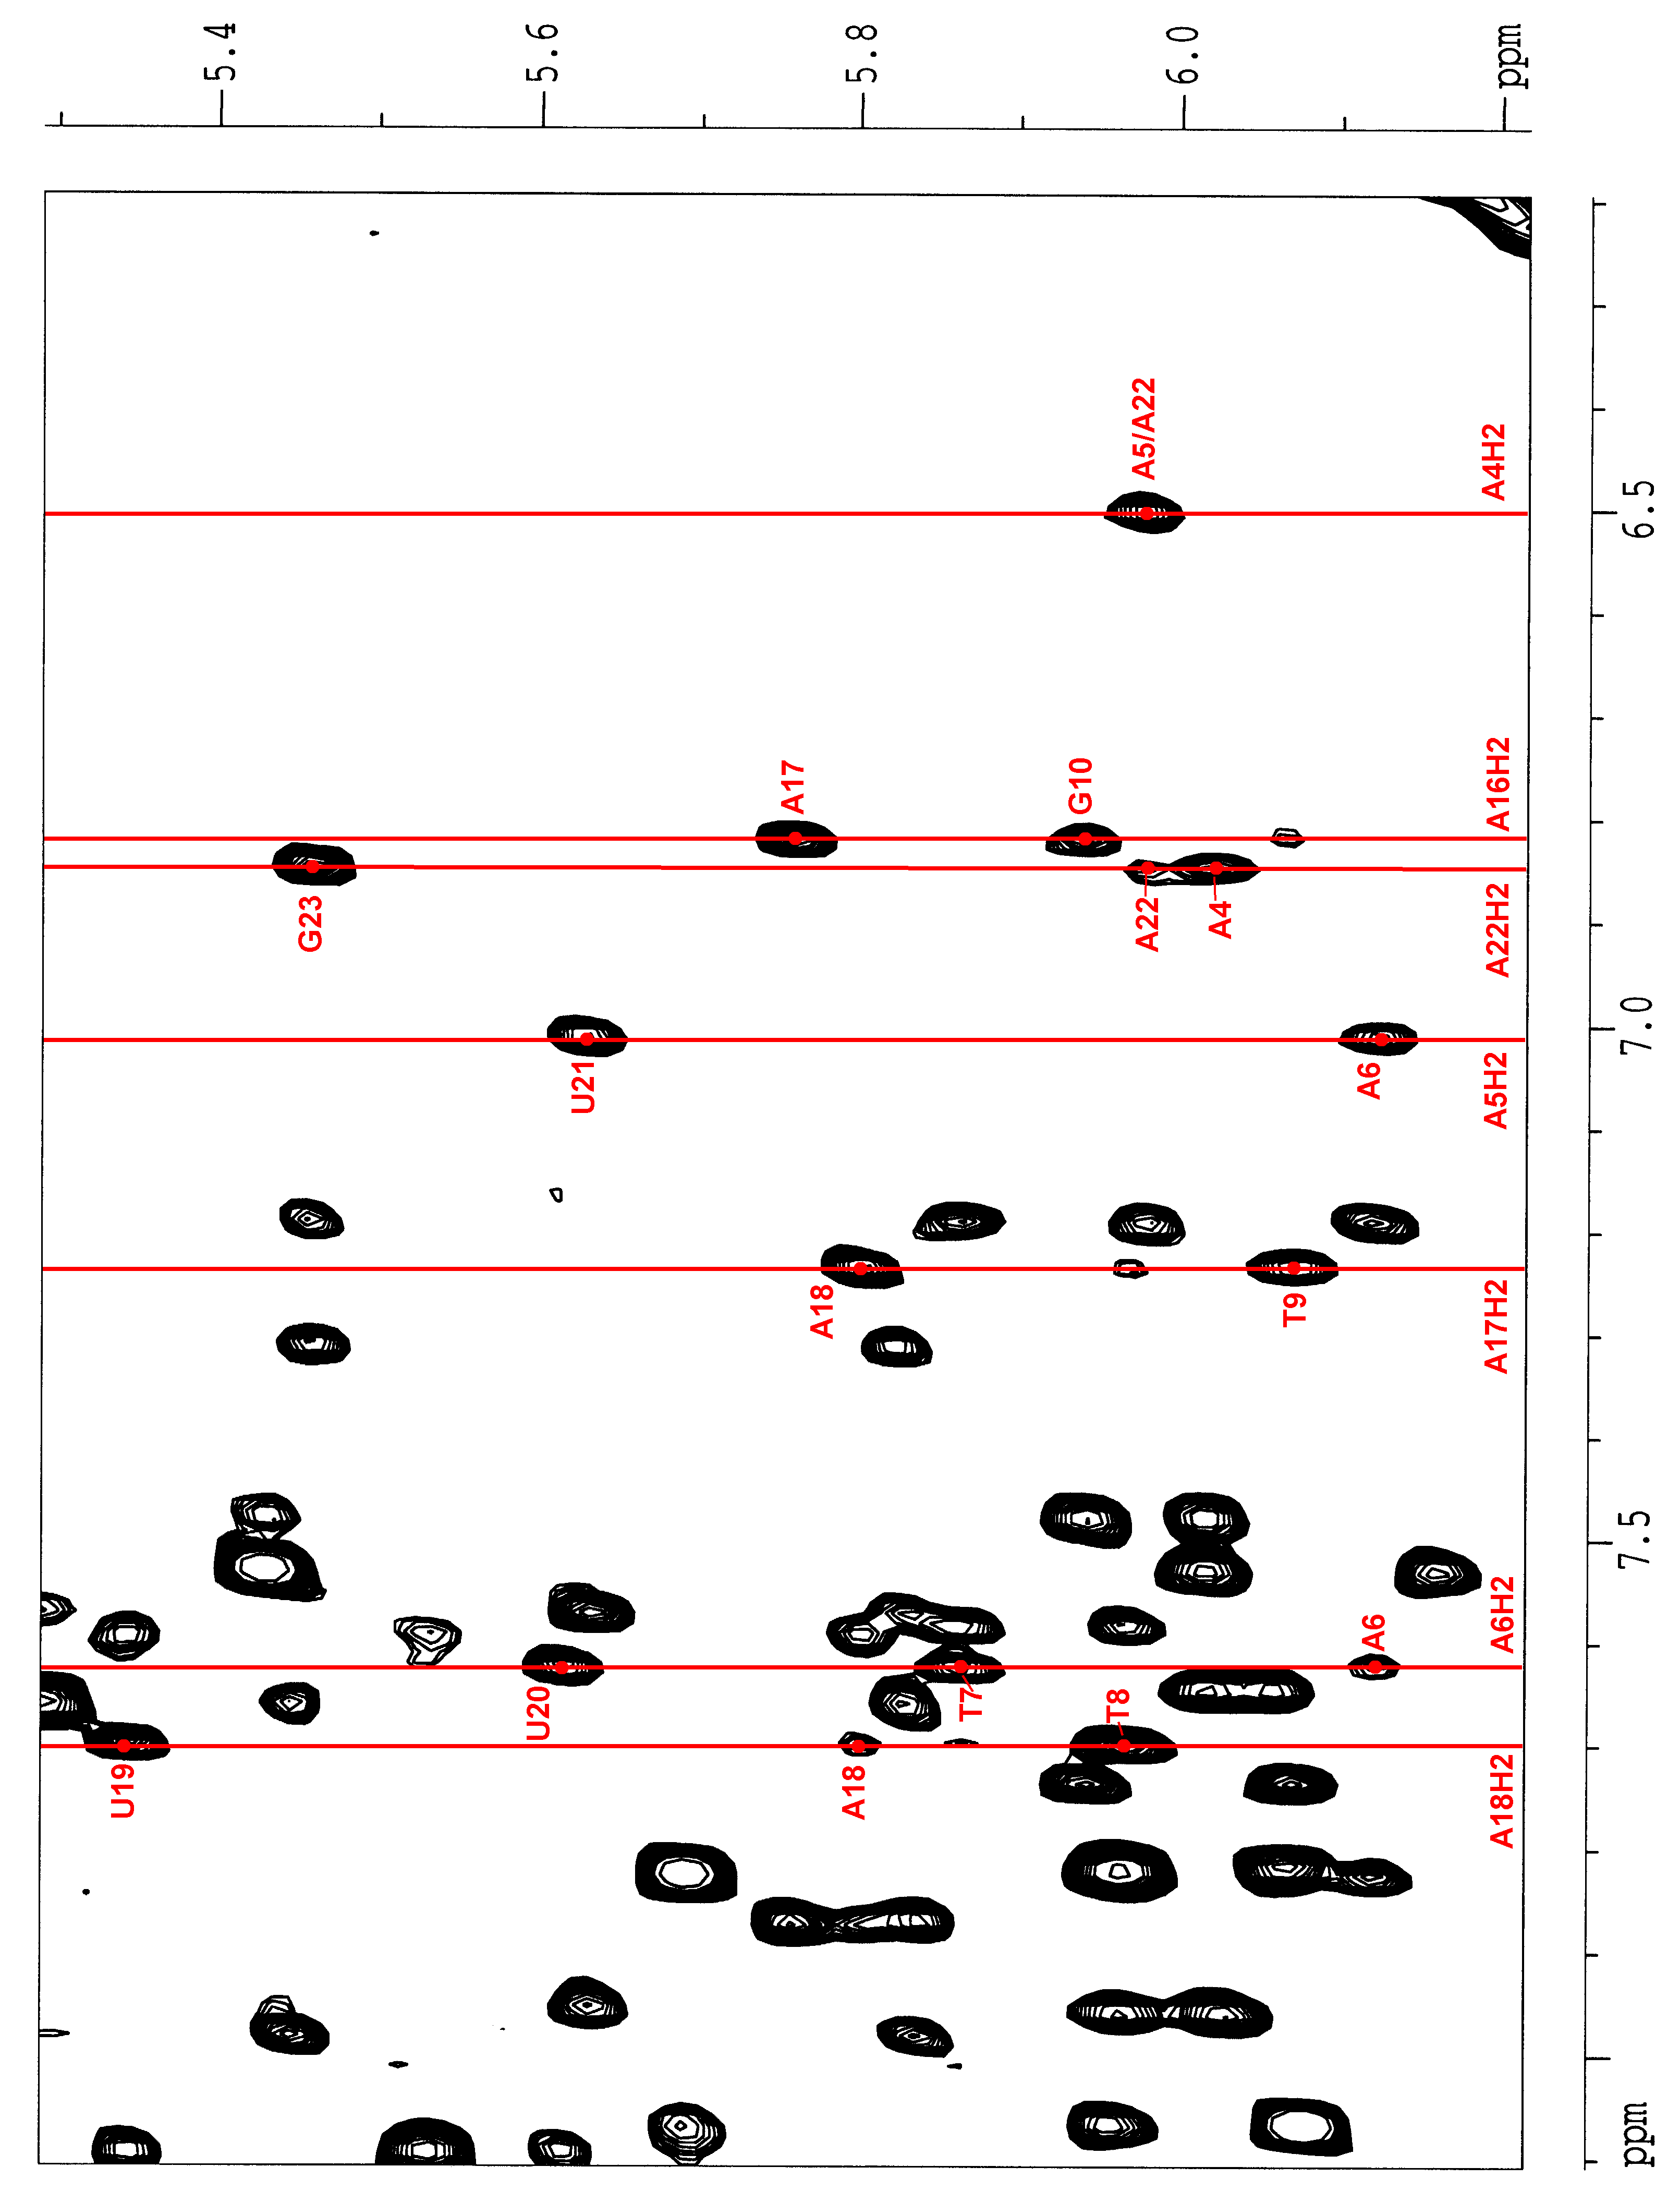


**Figure S7.** AH2-U/T imino proton region of 500 MHz NOESY spectrum of (A) natural (B) modified hybrid in H2O , 15 0C (WATERGATE solvent suppression)

(A) (B)

**
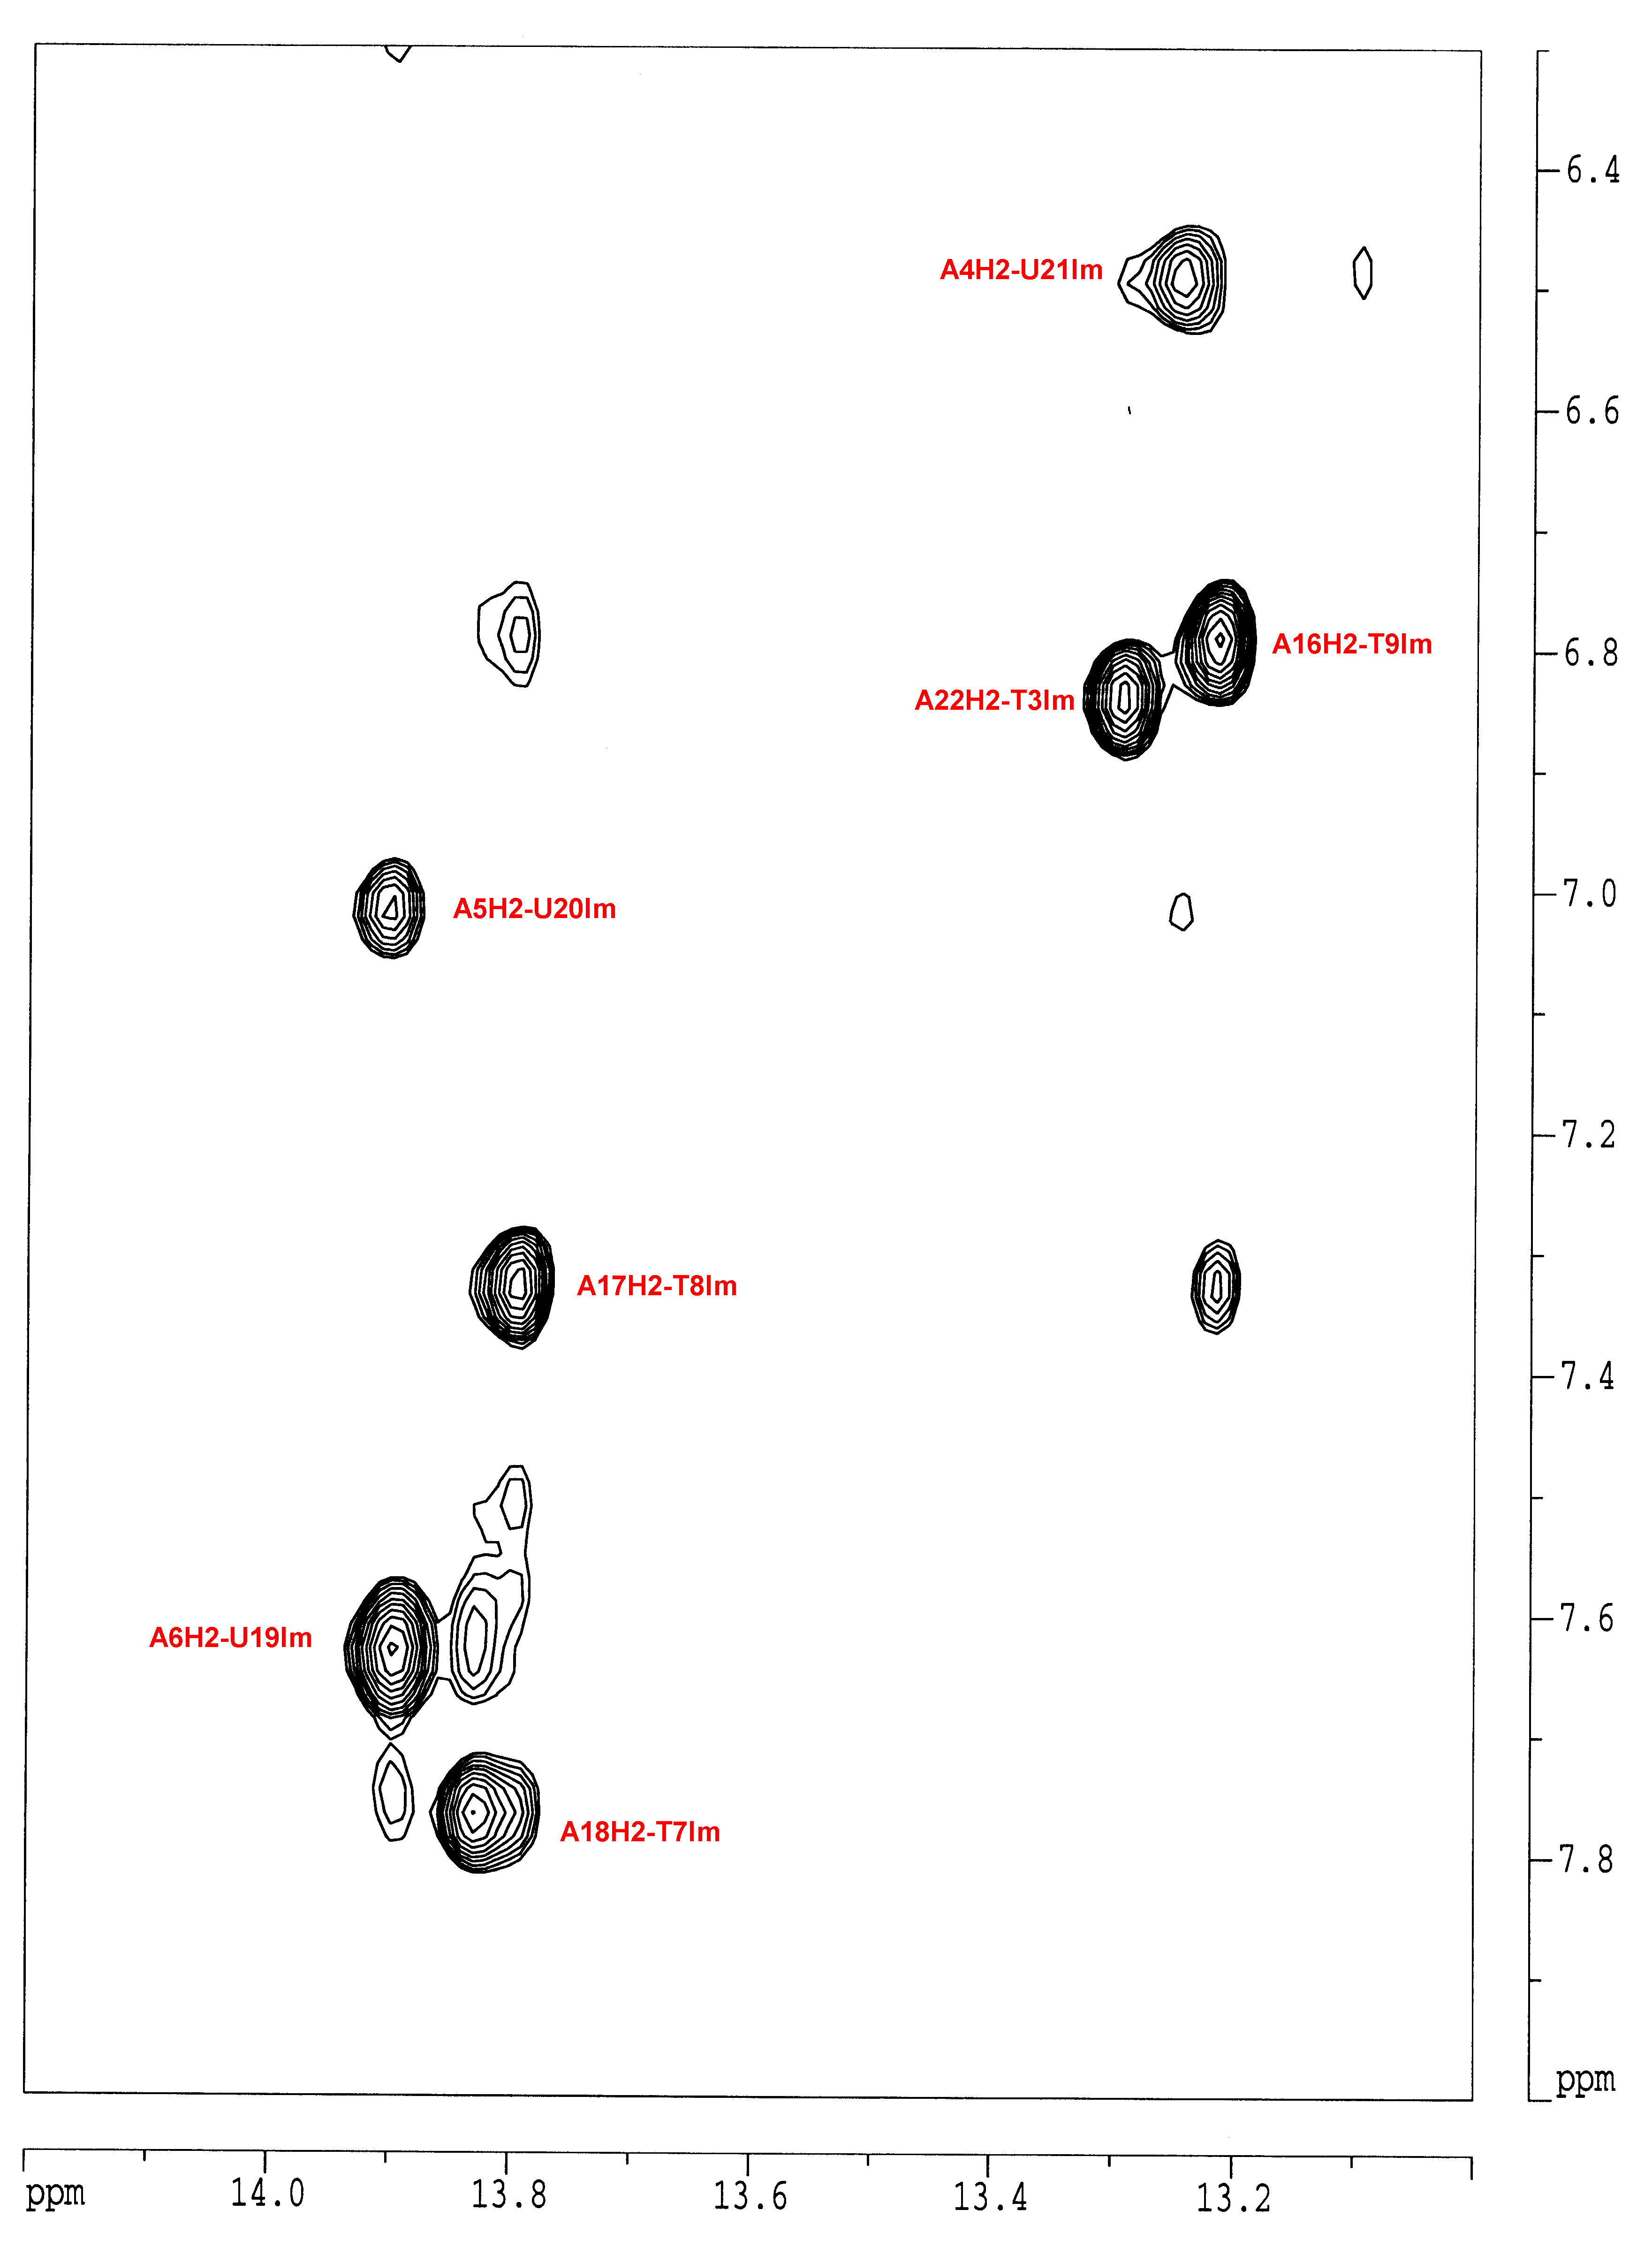
**
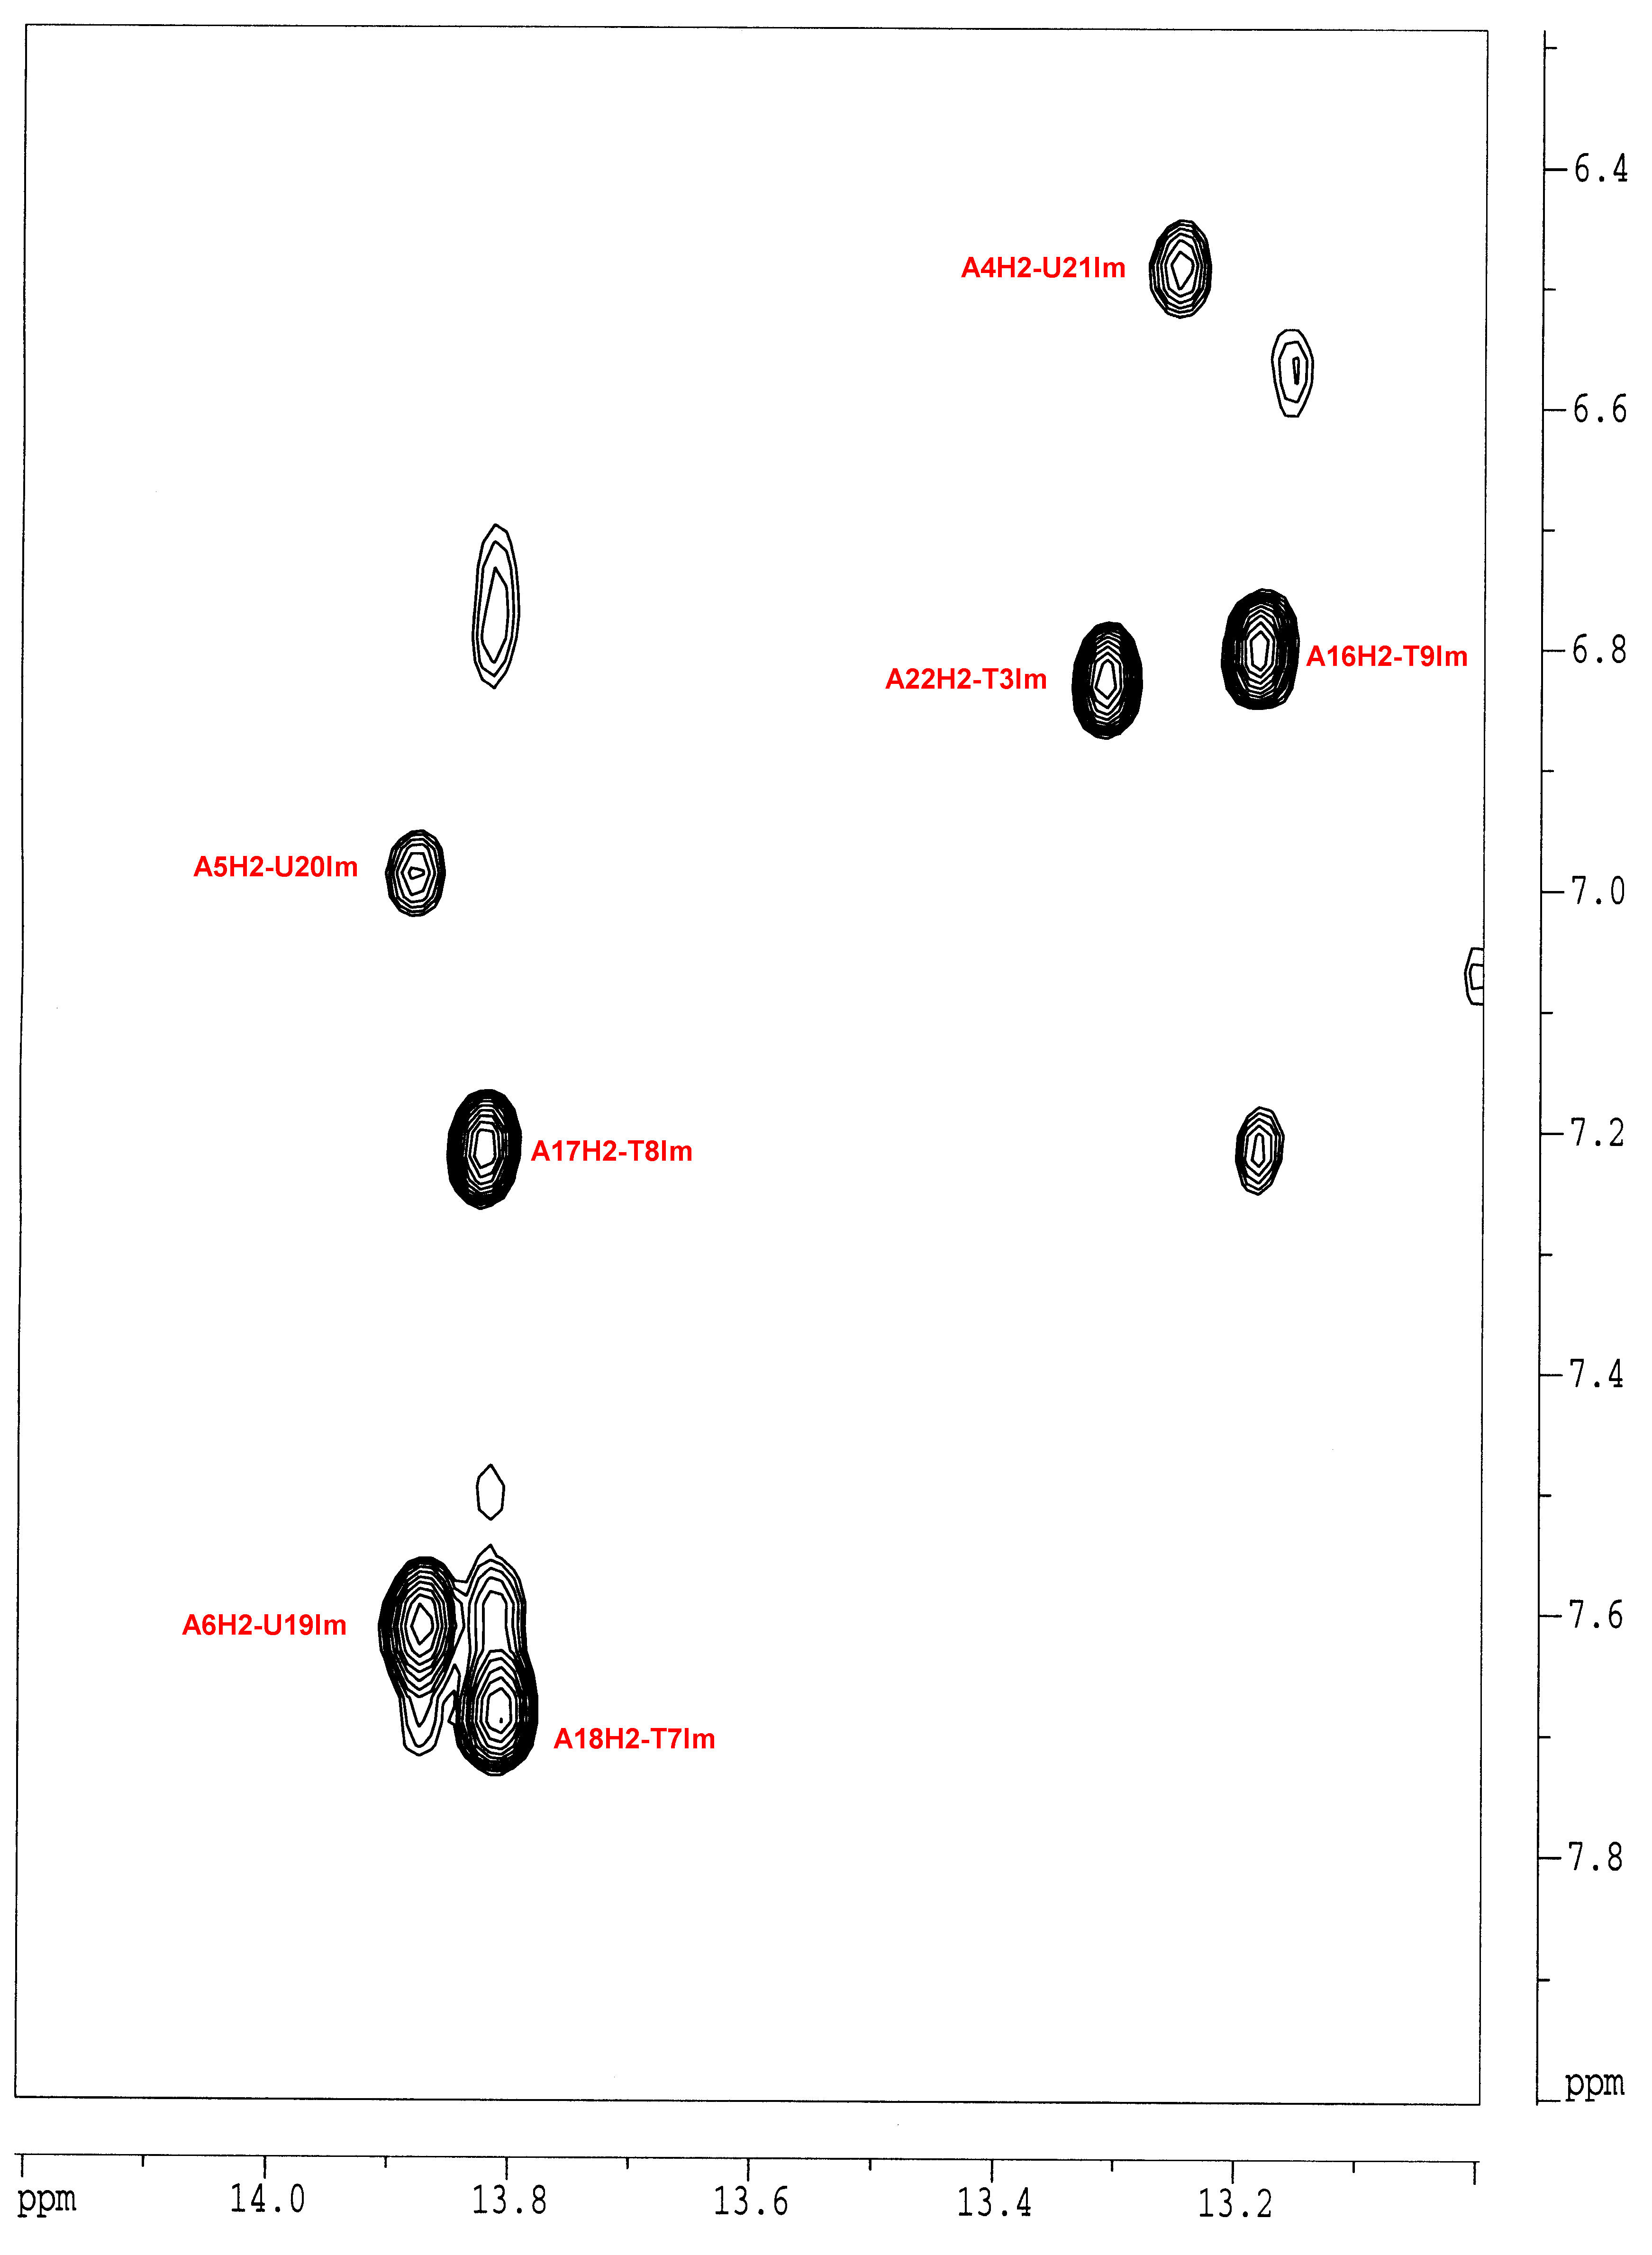


**Figure S8**. TMe-Im proton region of 500 MHz NOESY spectrum of (A) natural and (B) modified hybrid in H2O (15 0C (WATERGATE solvent suppression)). Xn represents Xn imino proton cross peaks

(A)

**
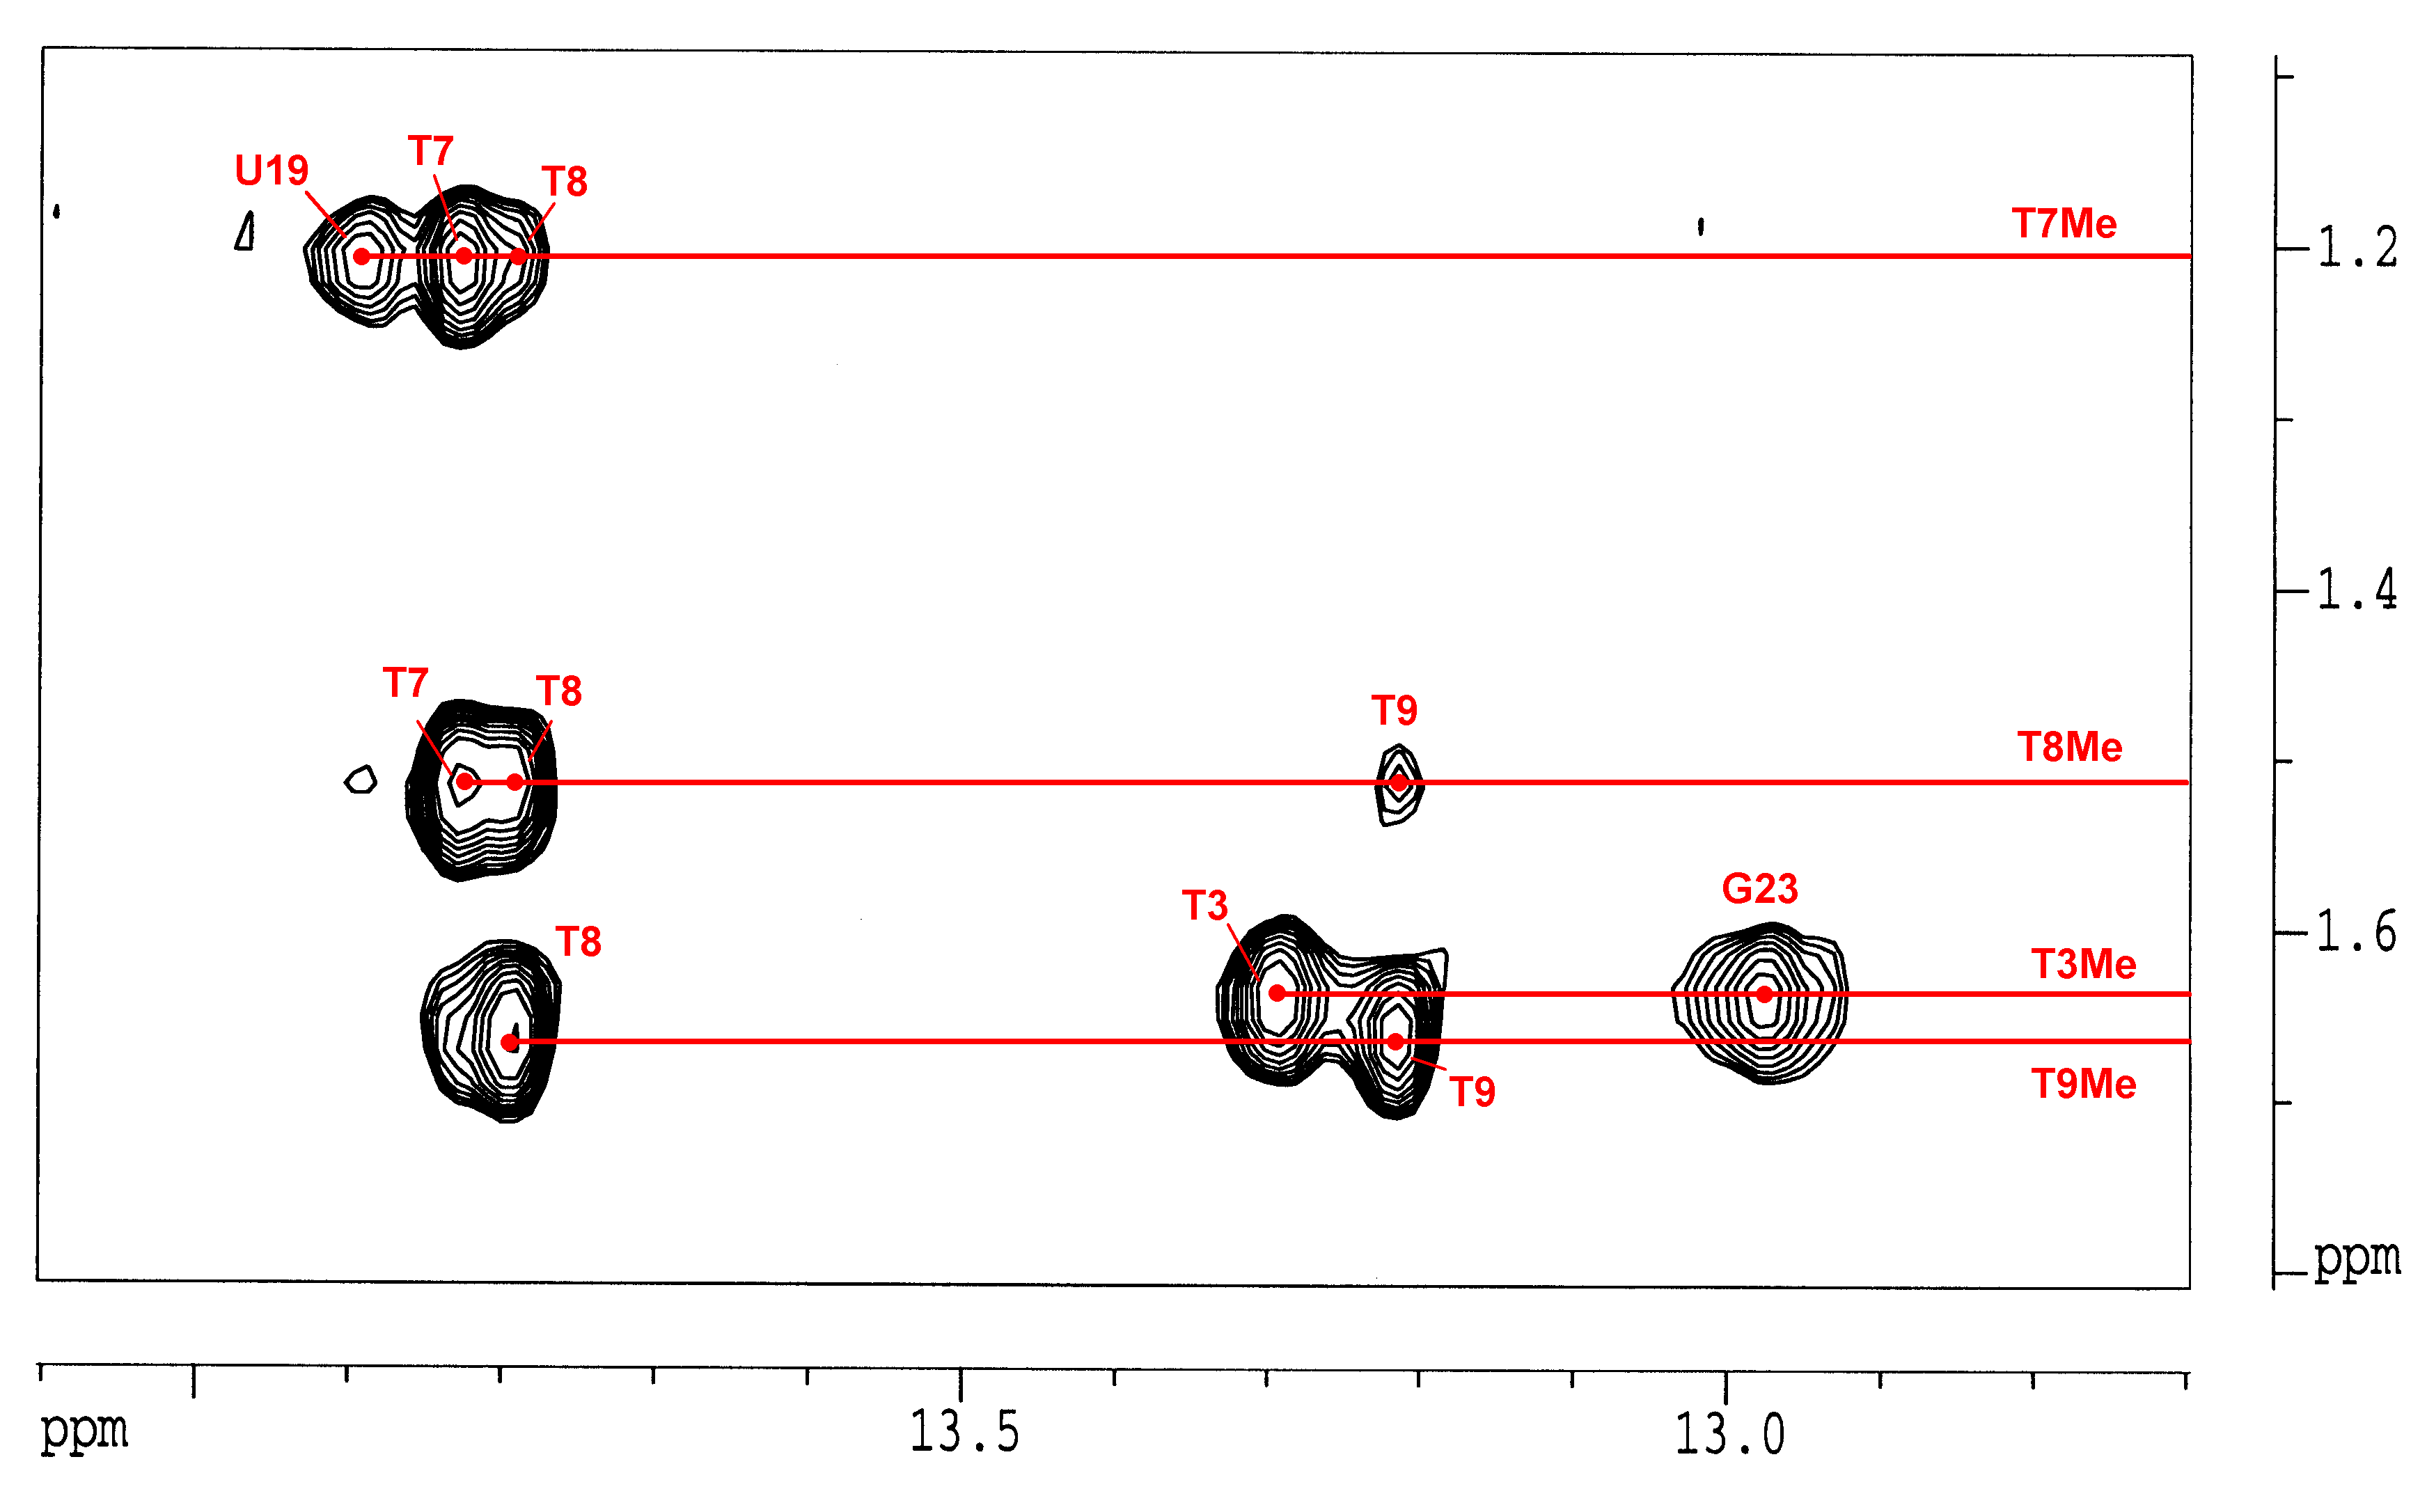
**

**(B)**


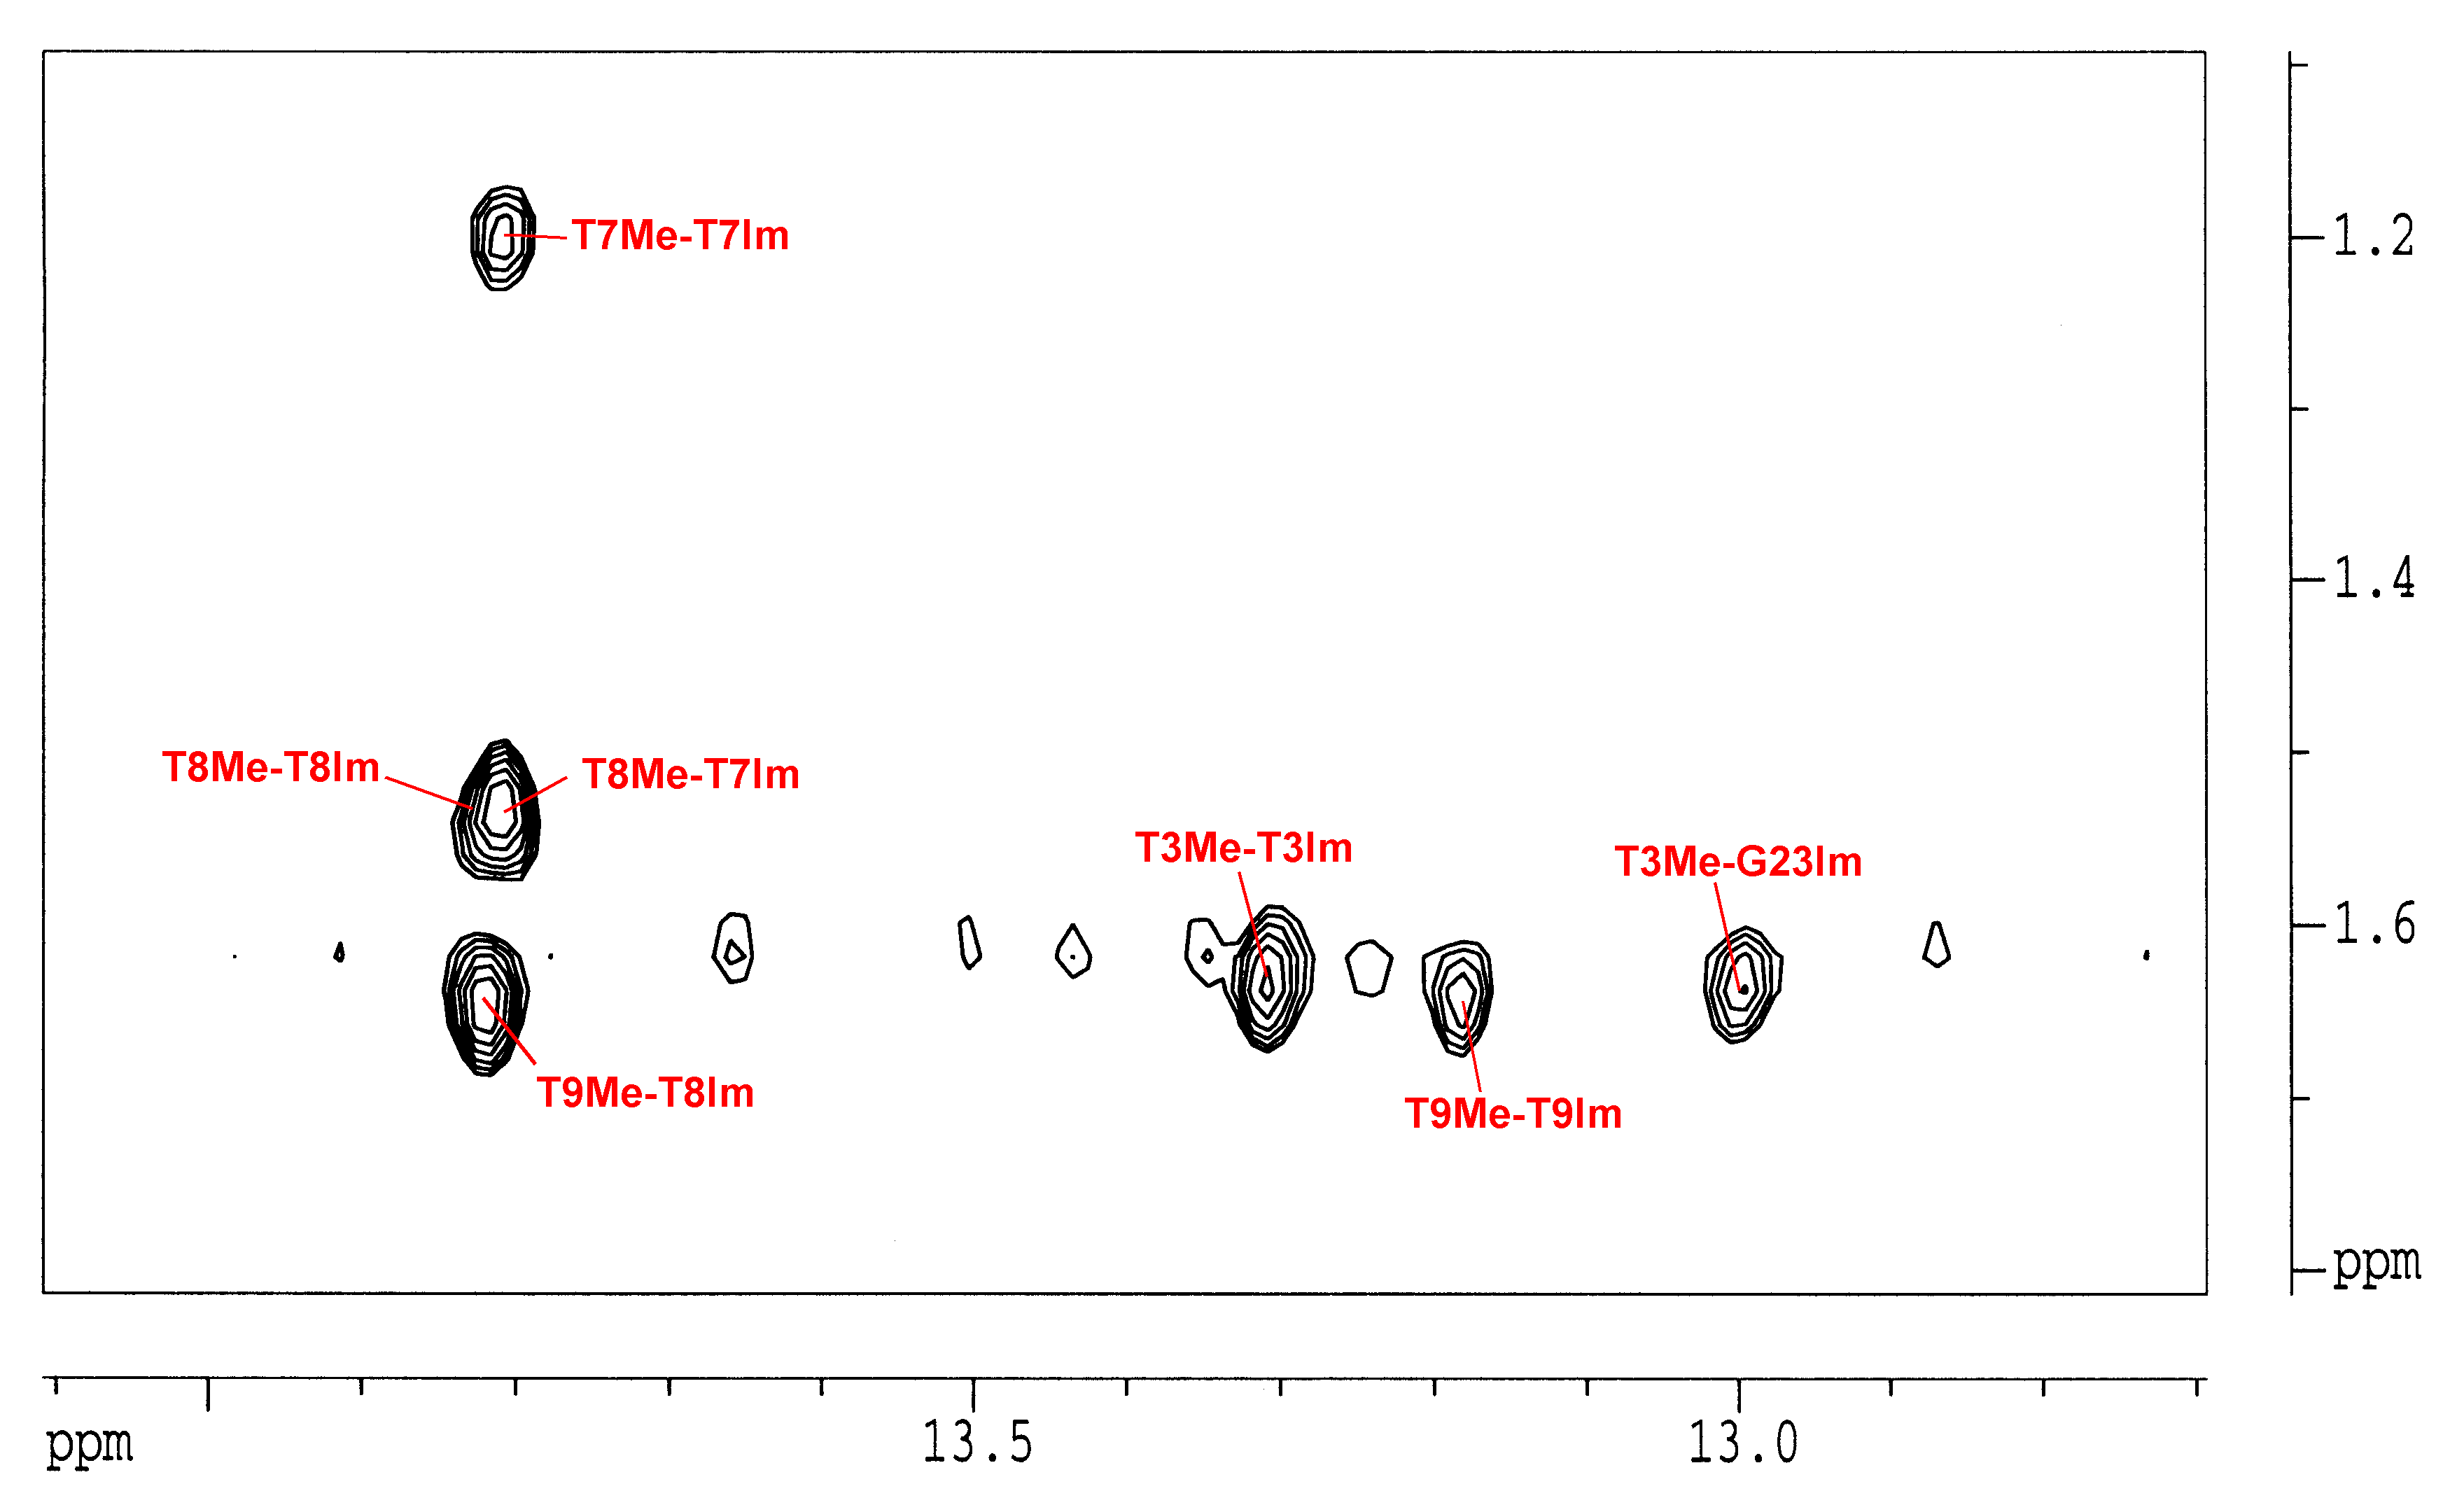


**Figure S9.** Imino-imino proton region of 500 MHz NOESY spectrum of (A) natural and (B) modified hybrid in H2O

**(A)**

**
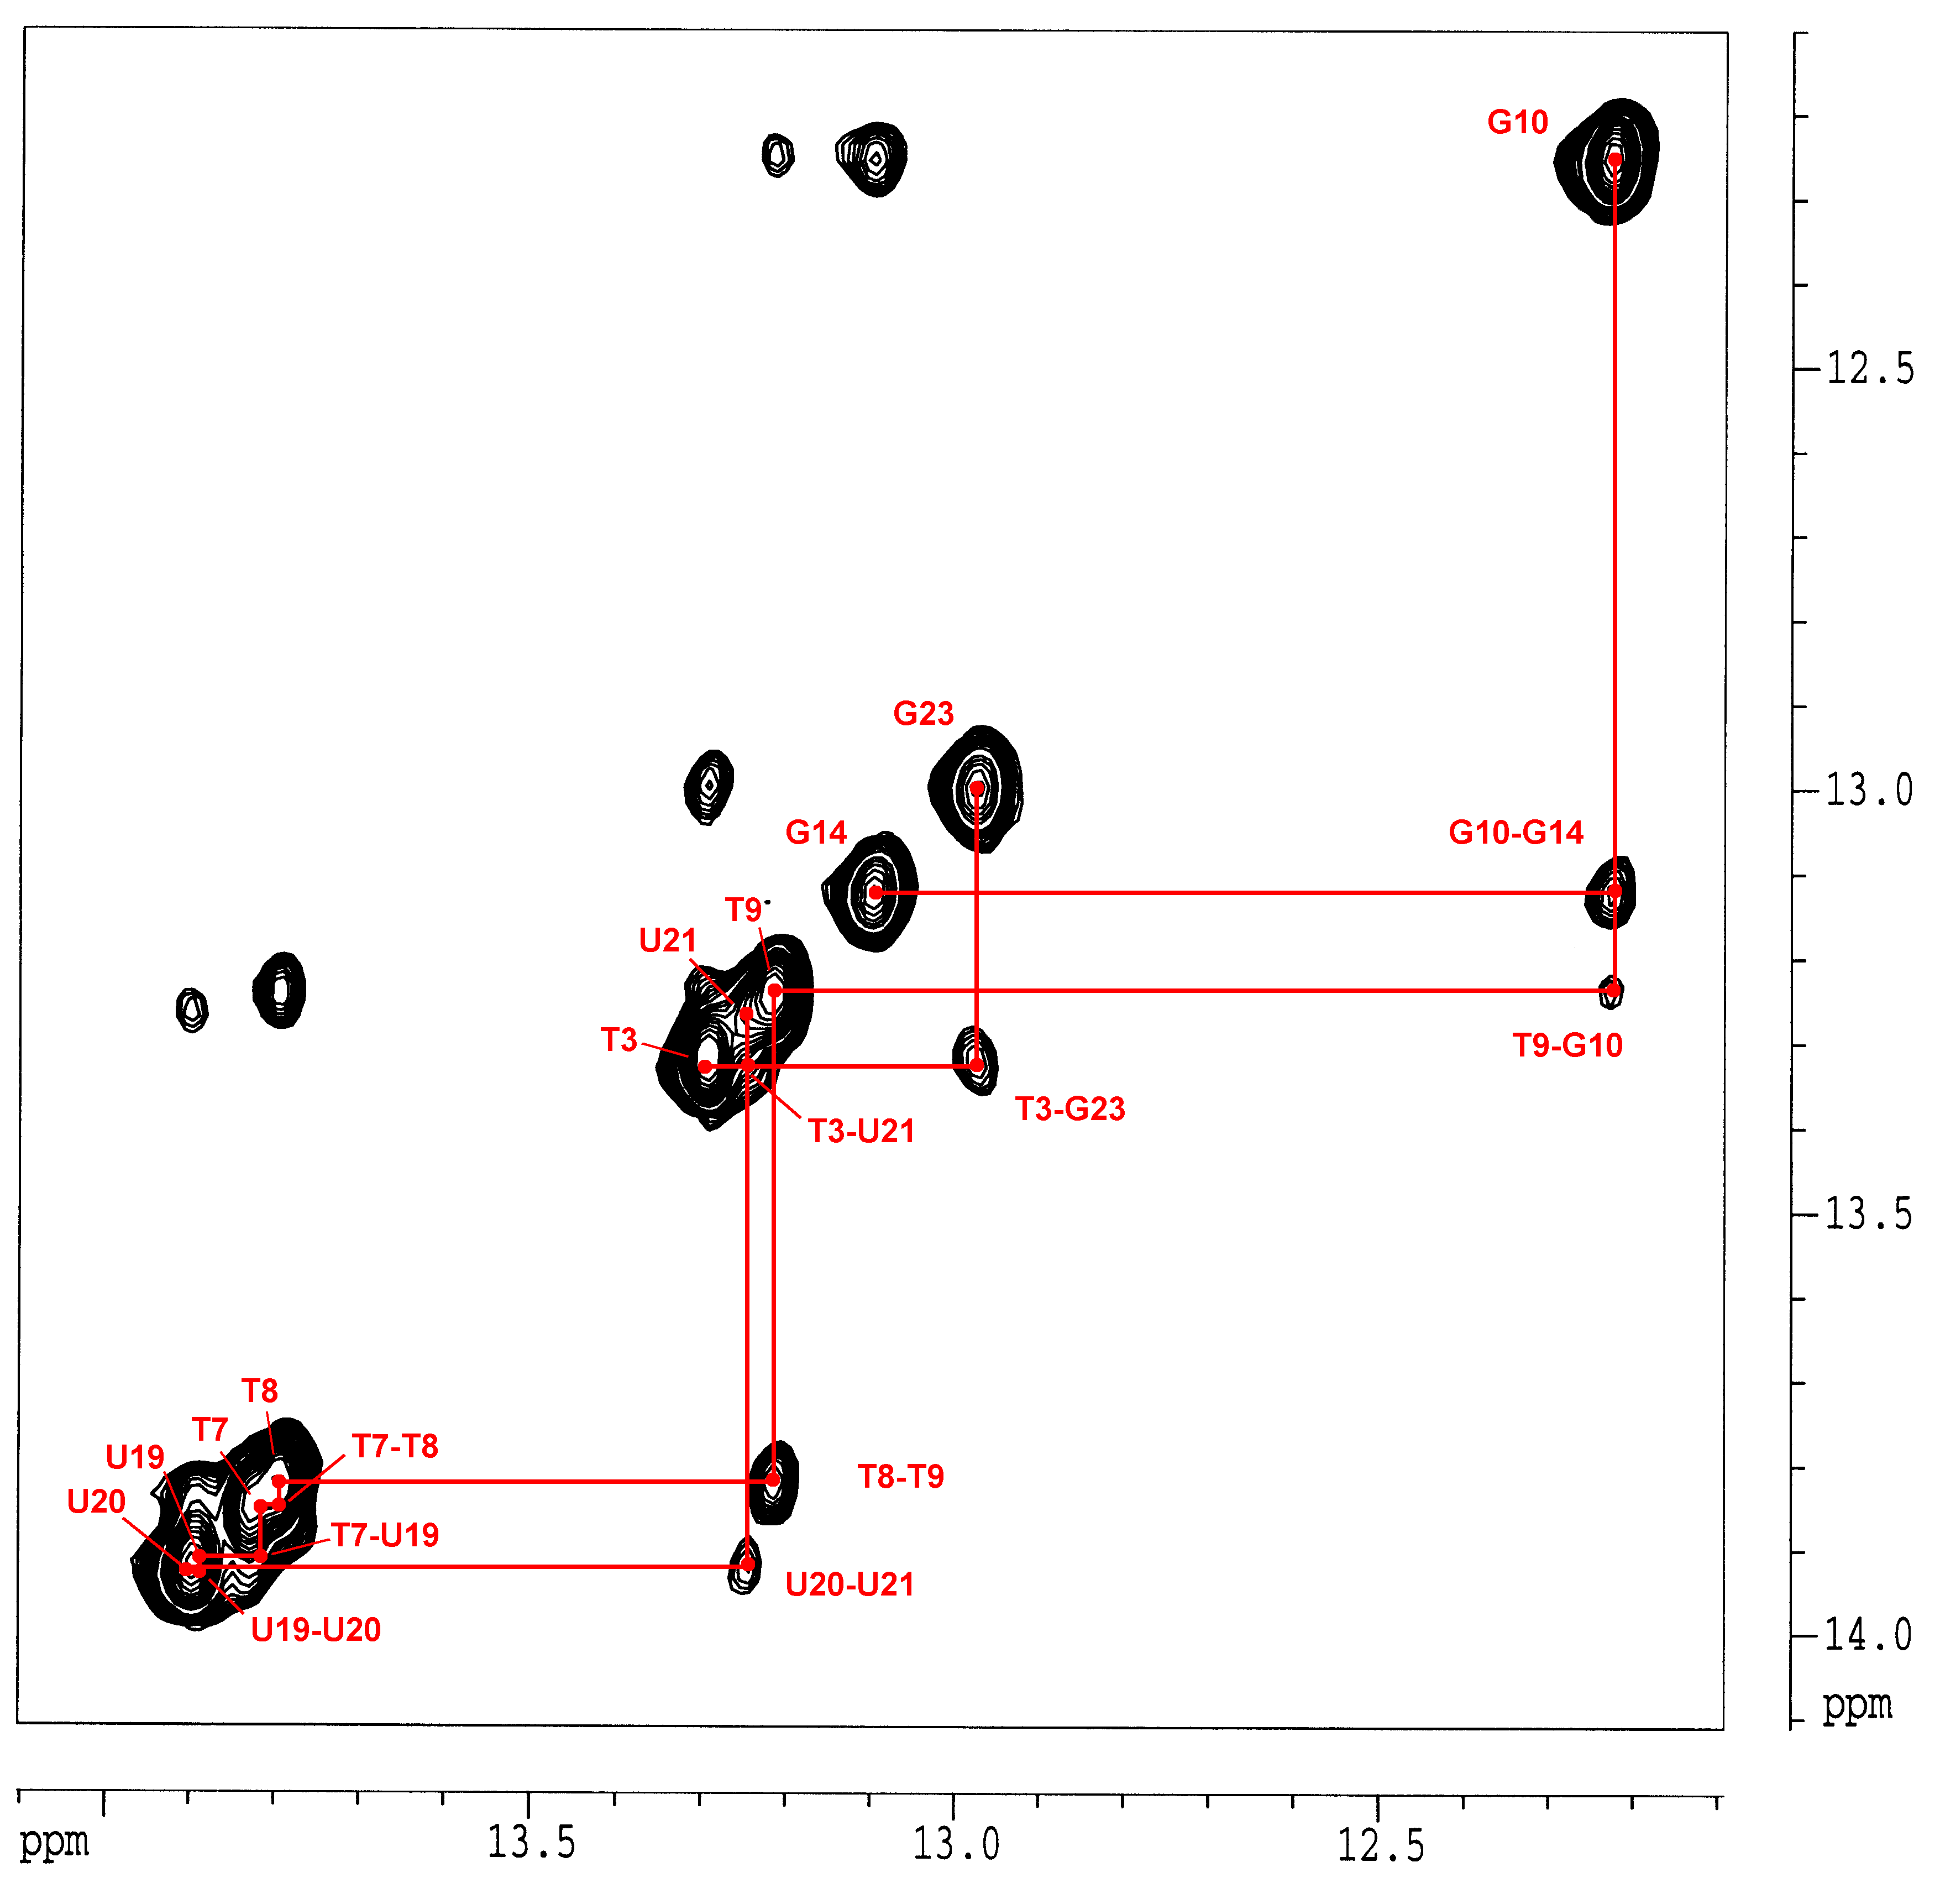
**

**(B)**


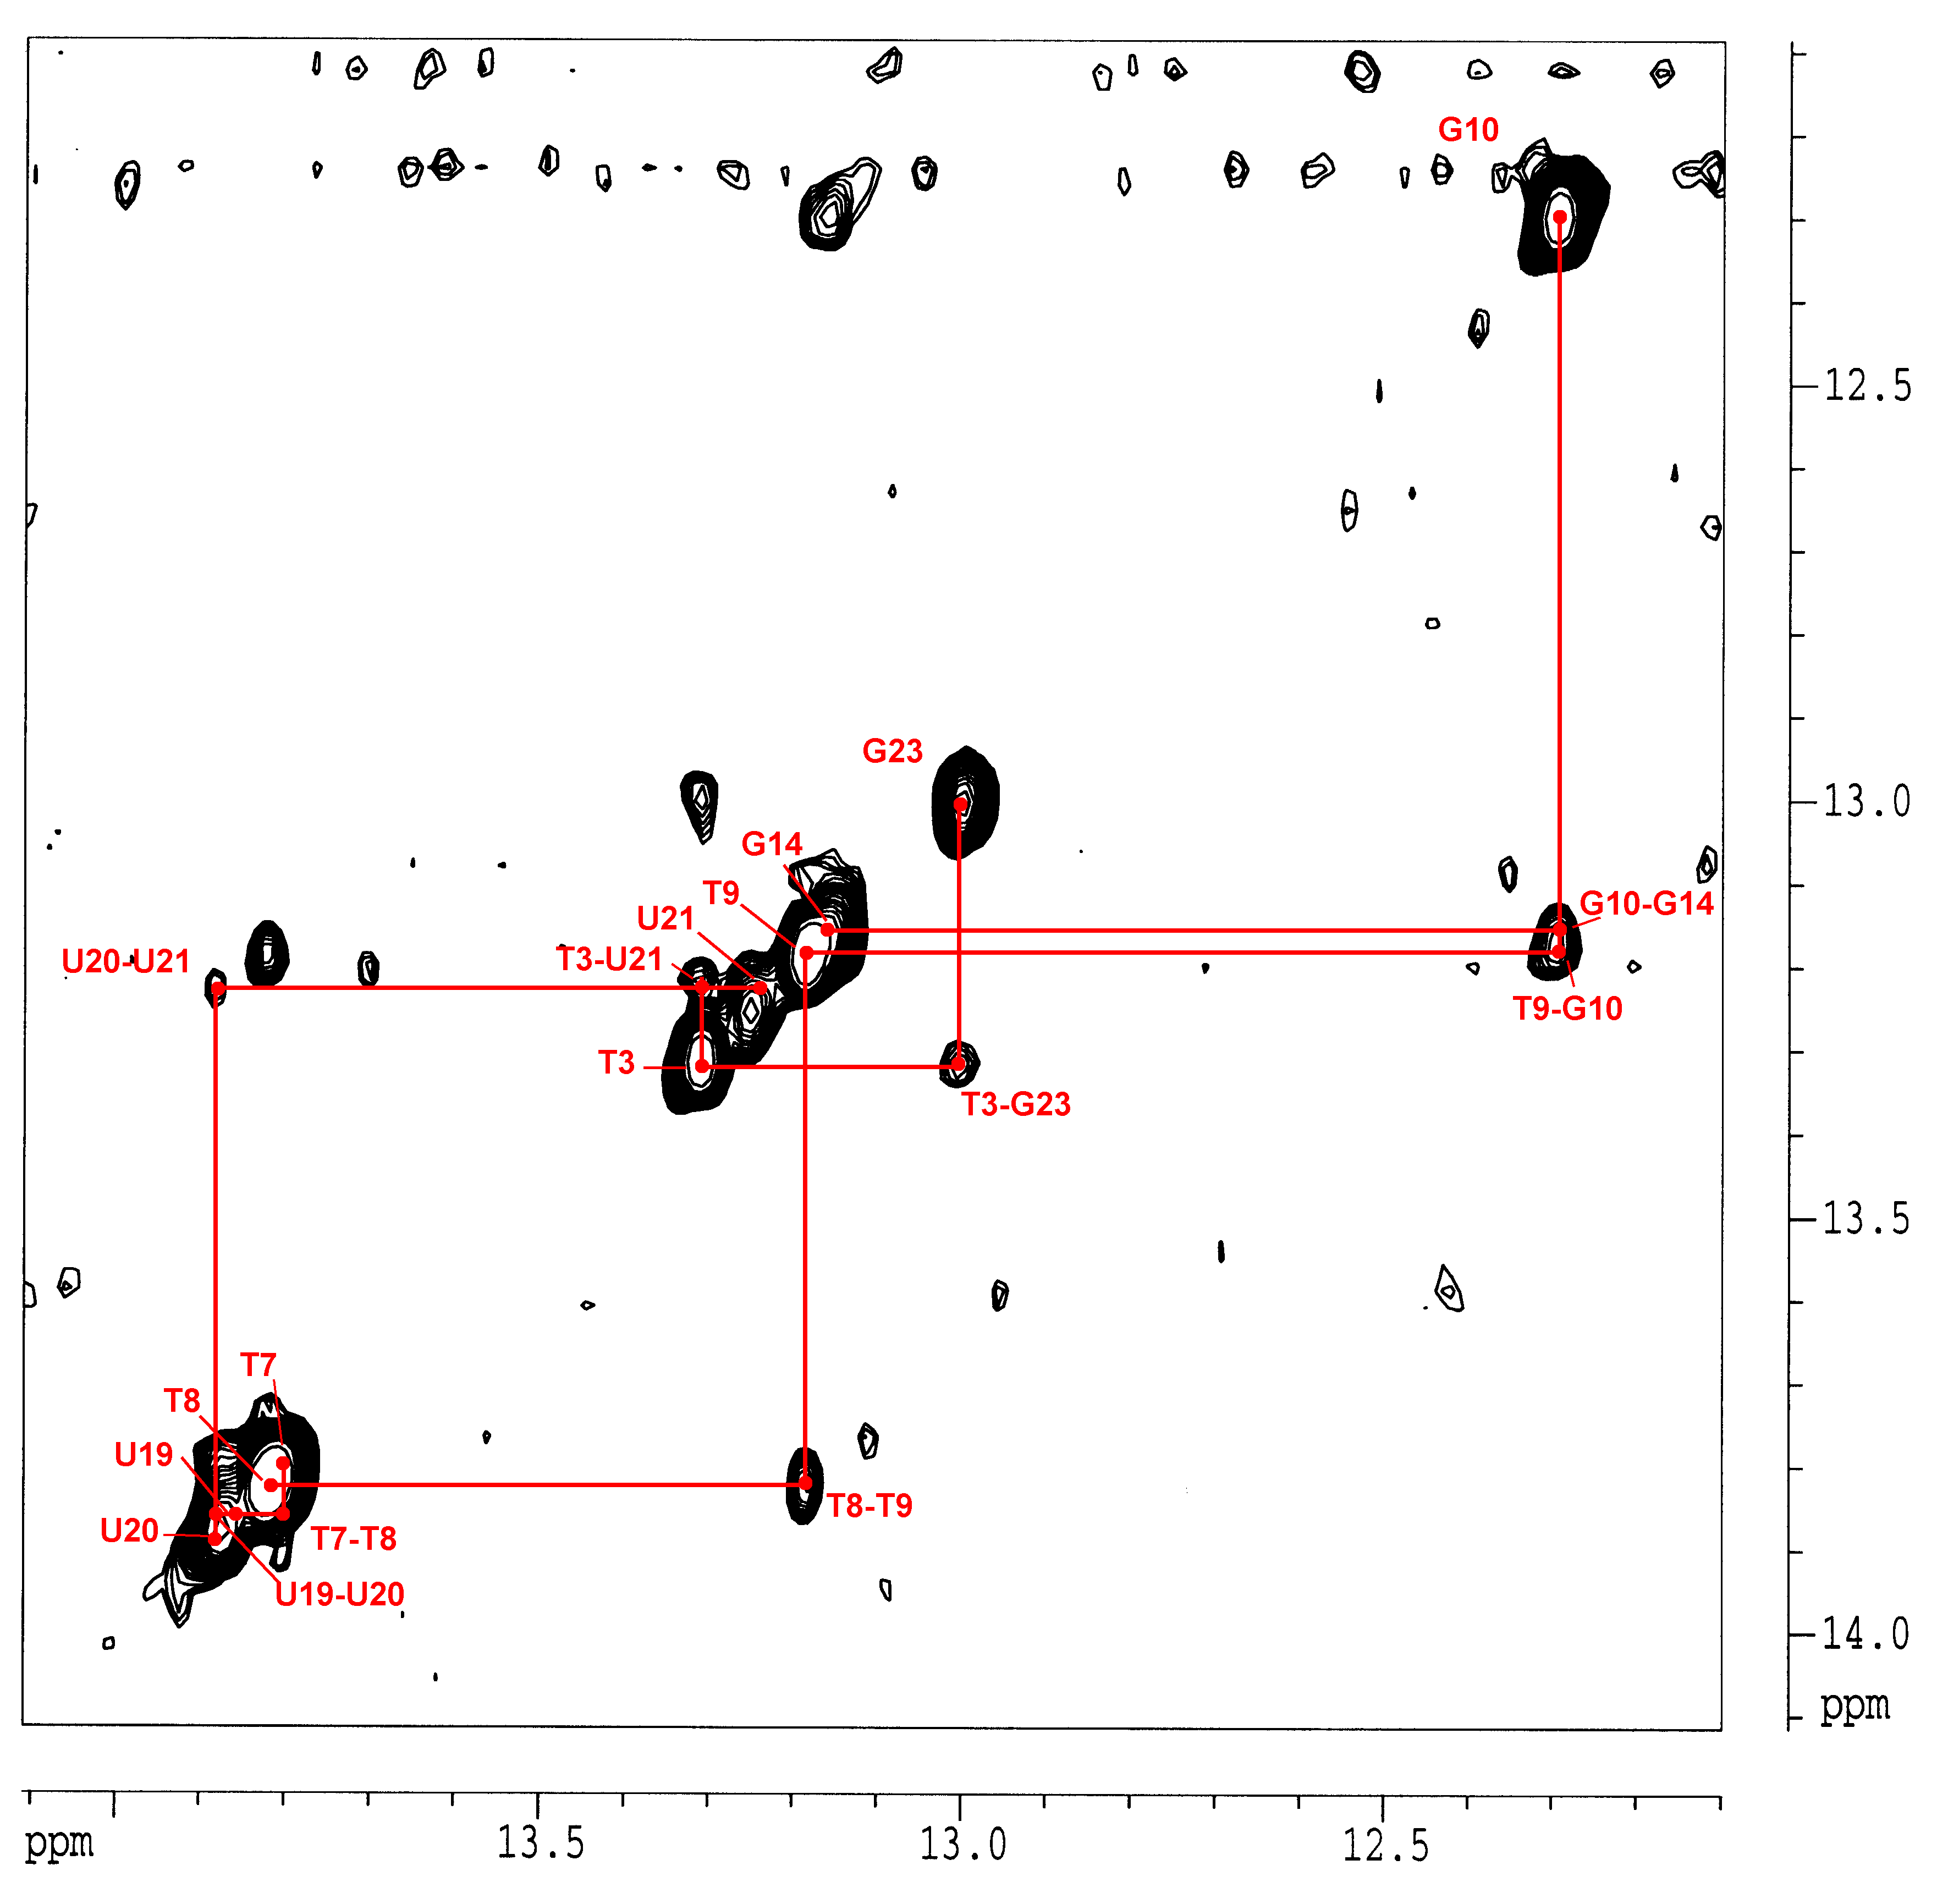


**Figure S10**. Section through the 500 MHz NOESY spectrum, illustrating relative size of DNA nH1’-nH2’ and nH1’-nH2” cross peaks in (A) natural, and (B) modified hybrid.

(A) (B)

**
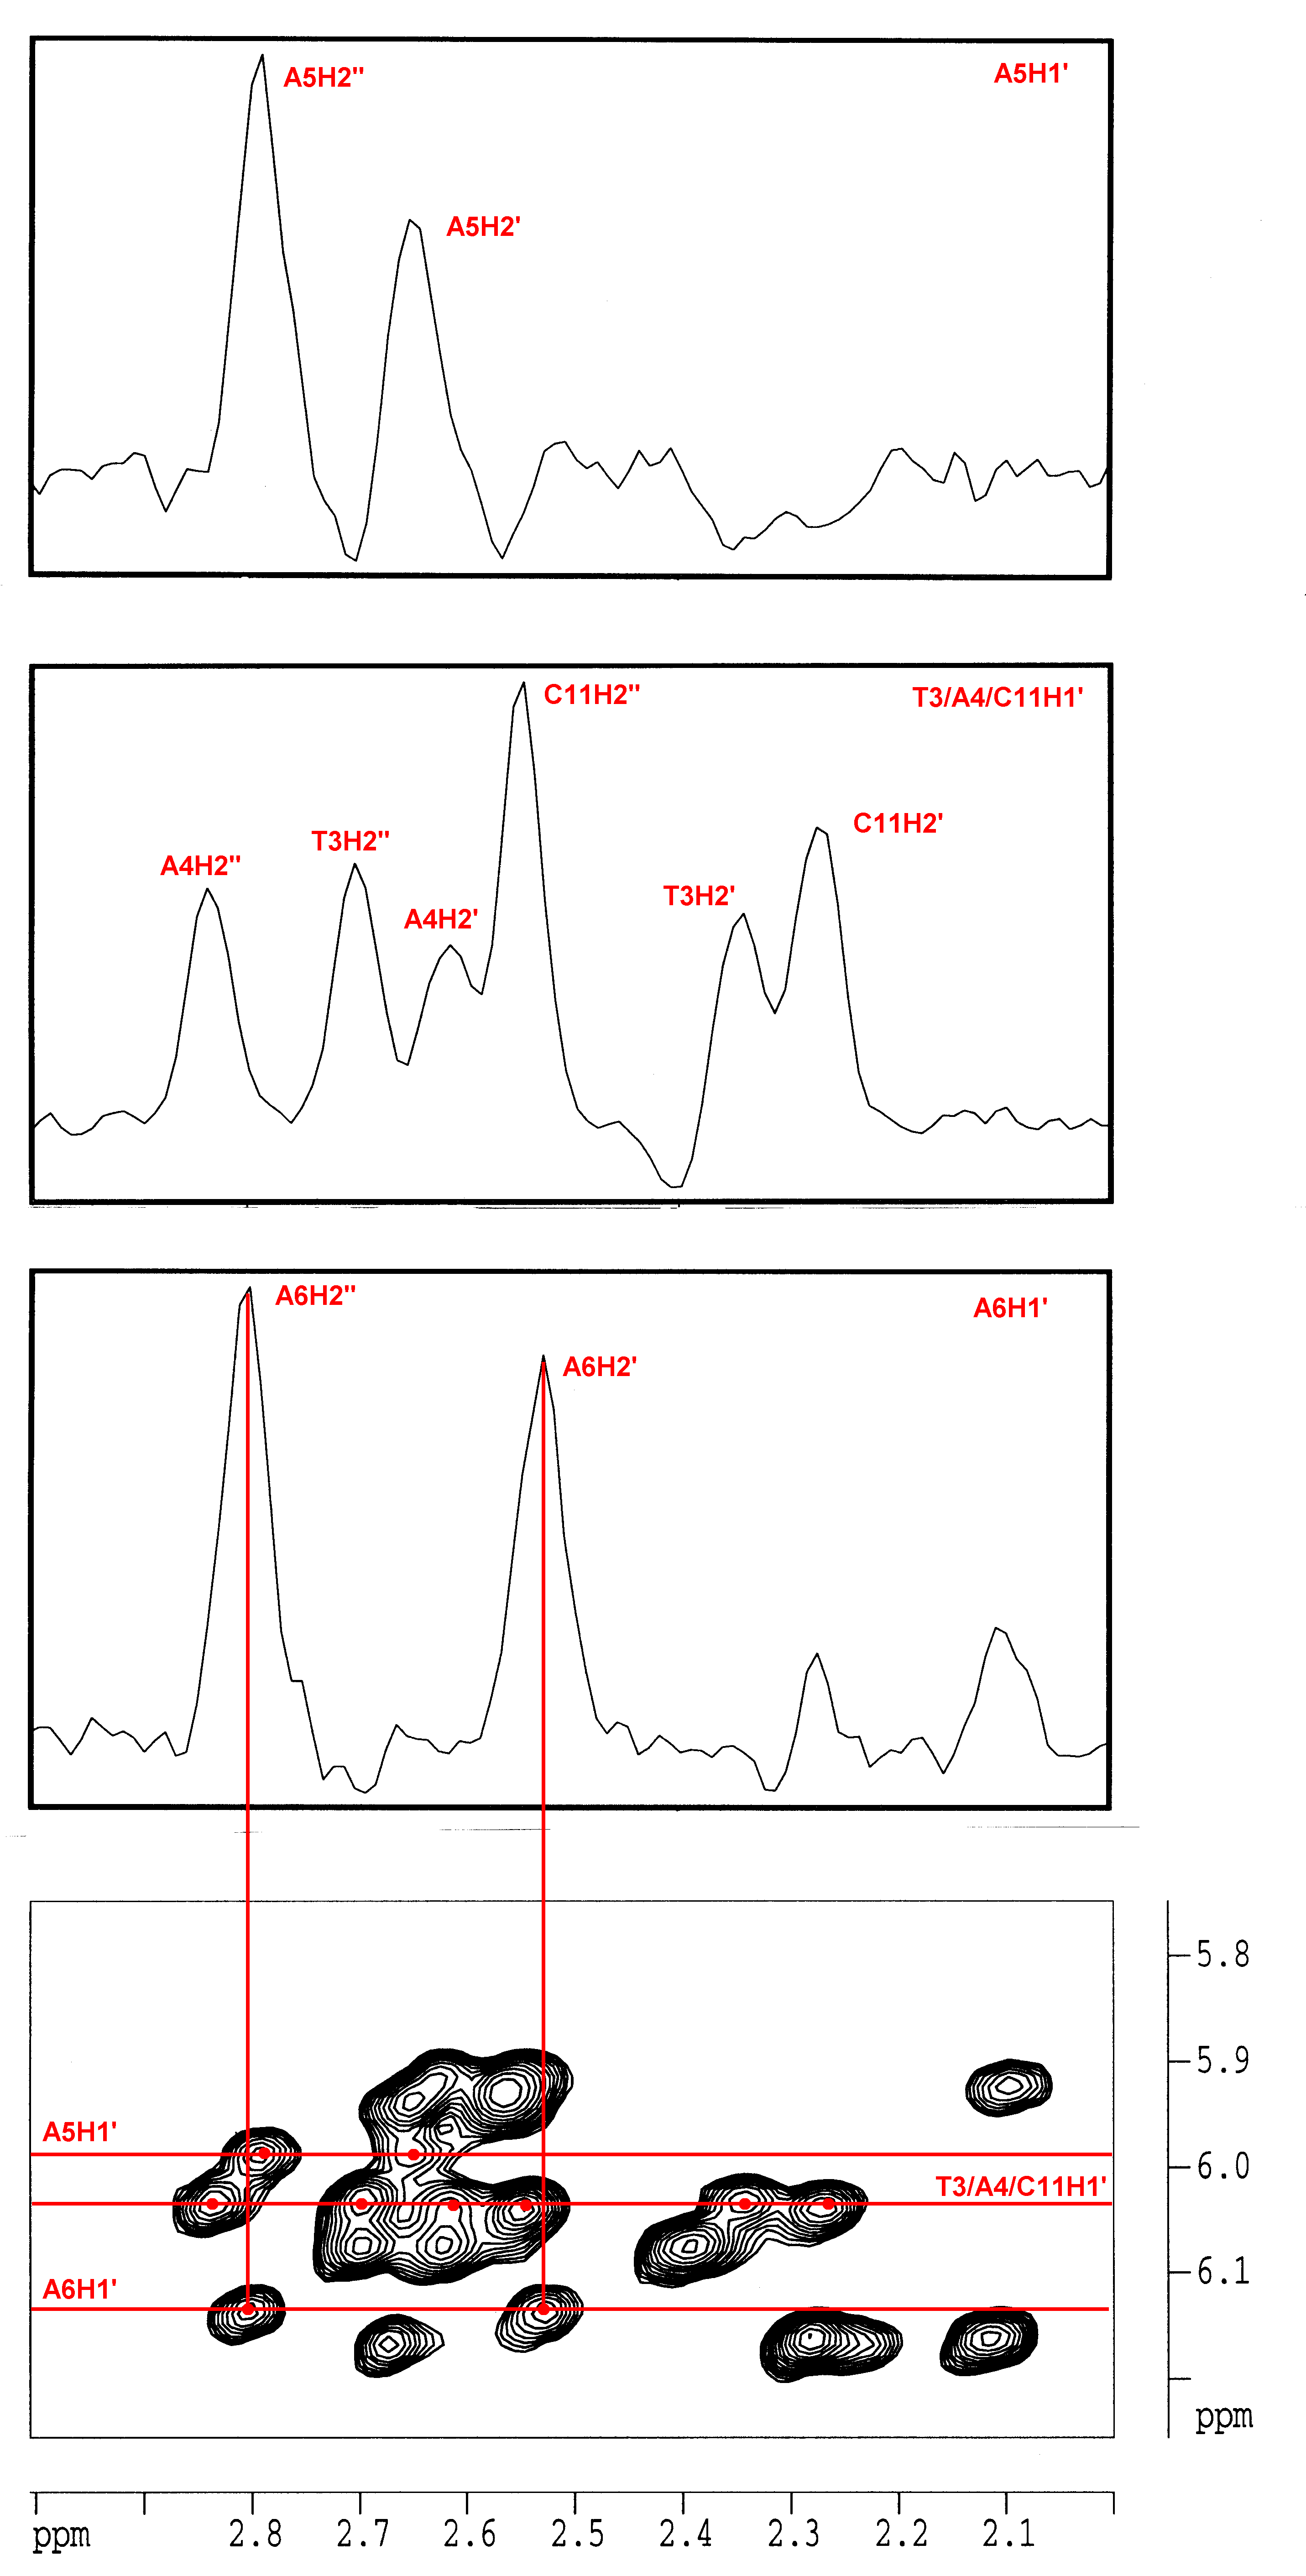
**
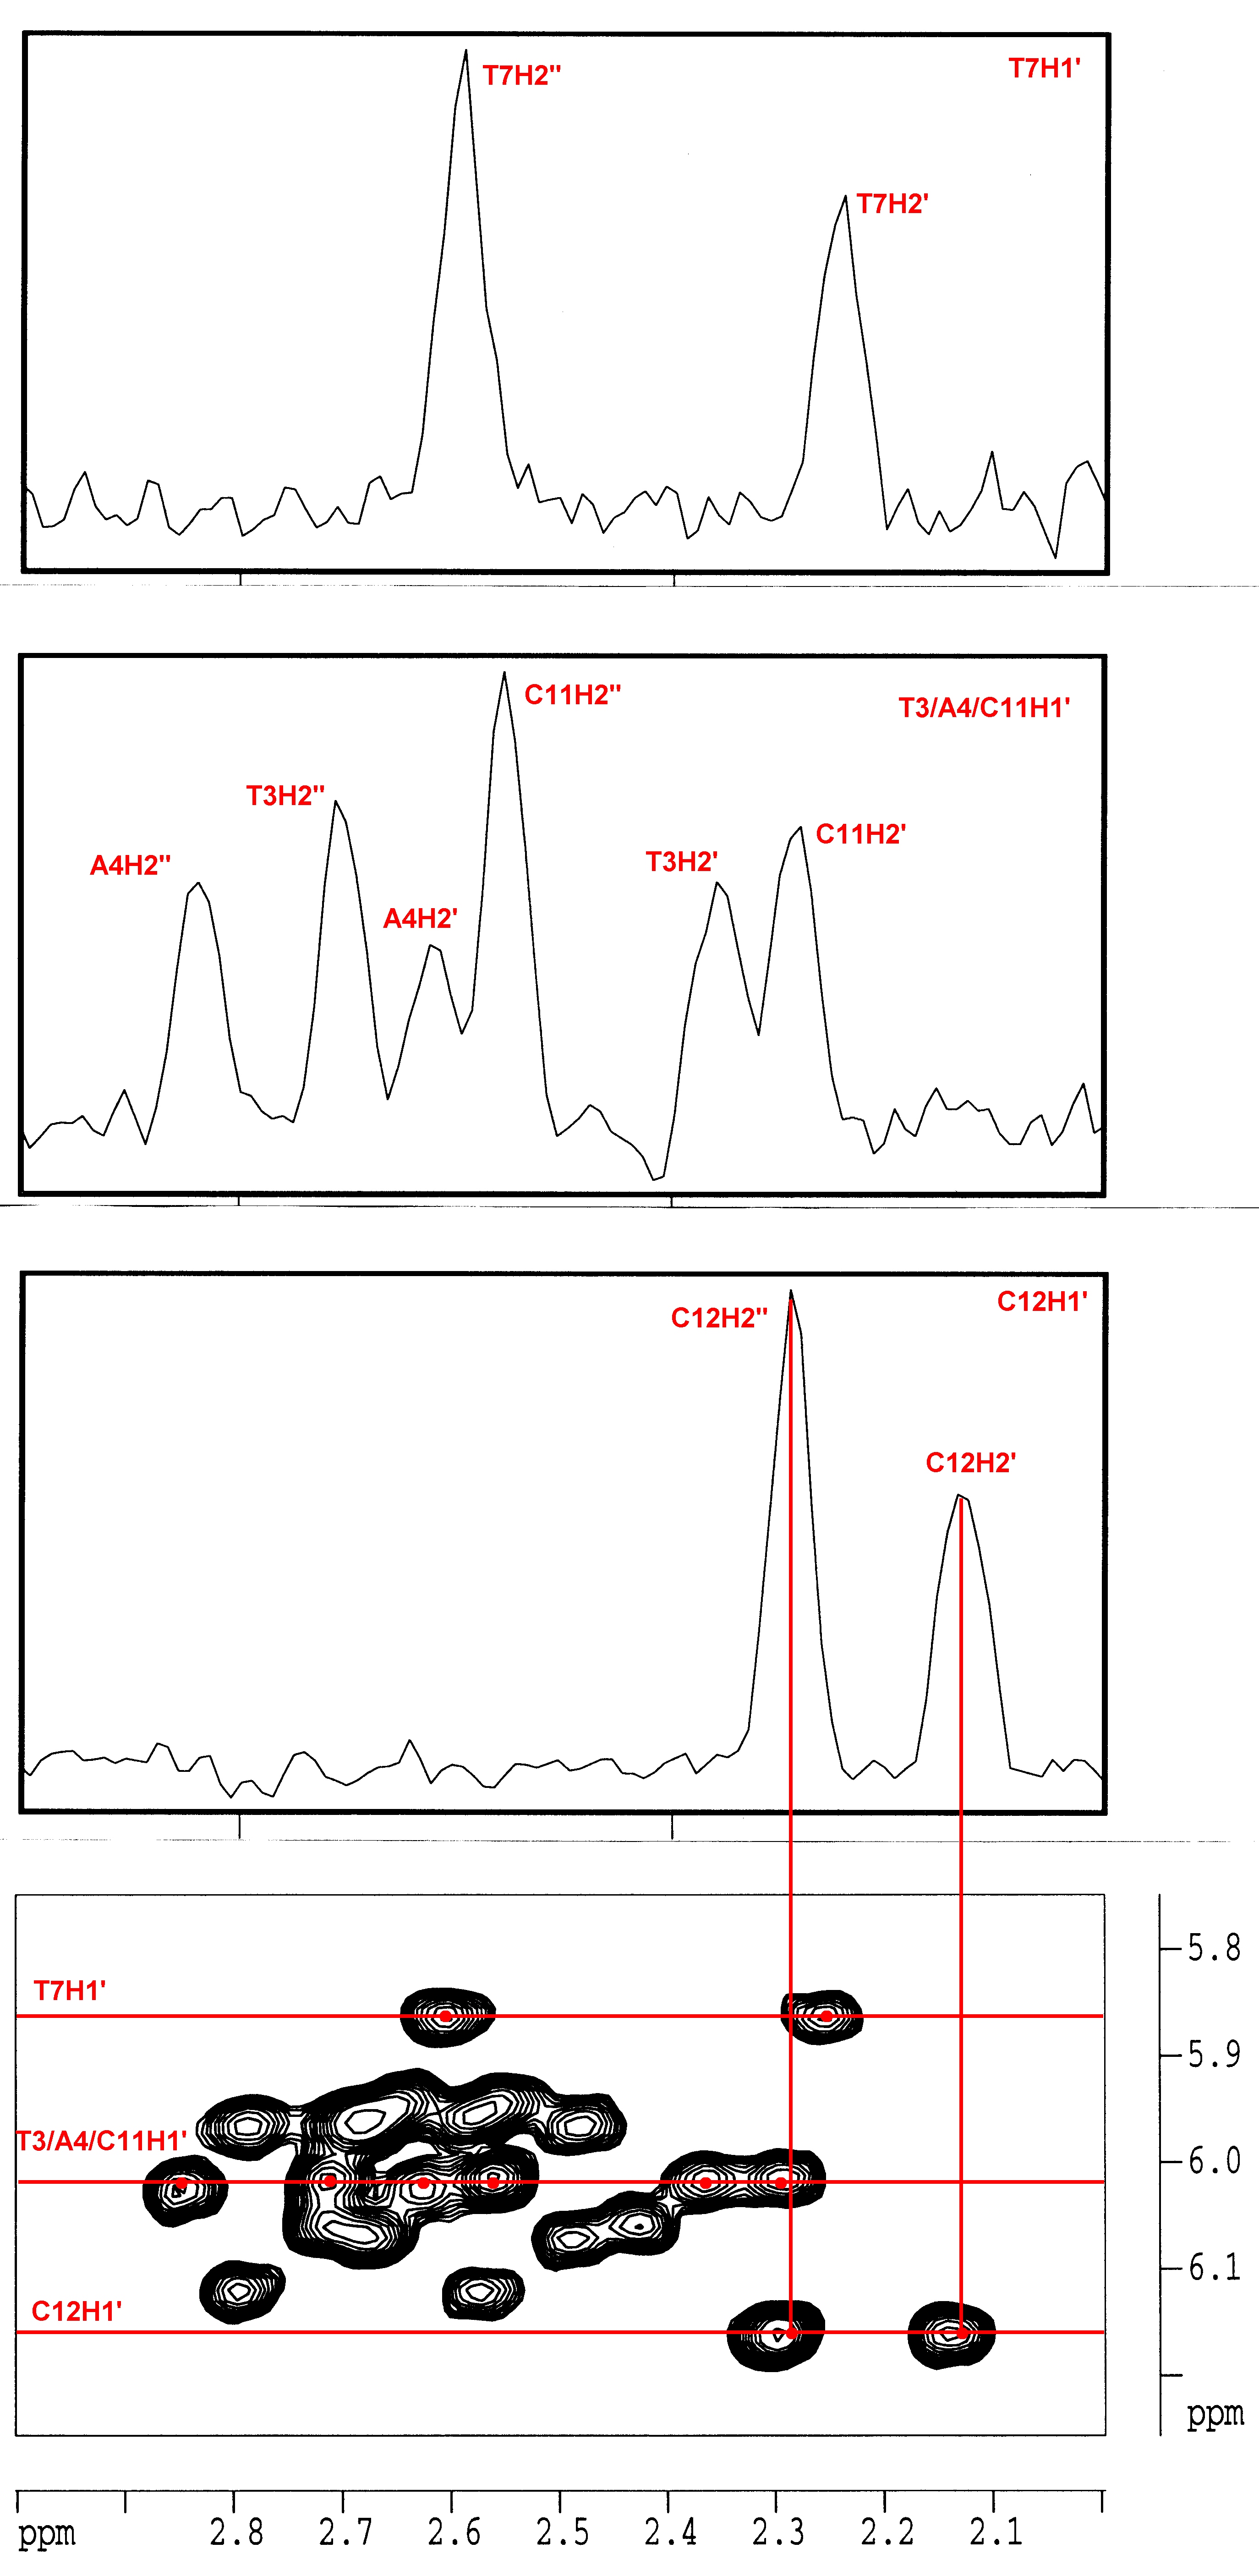


**Figure S11**. Section through the 500 MHz NOESY spectrum, illustrating relative size of inter- and intra-strand H1’-AH2 cross peaks for the (A) natural and (B) modified hybrid.

(A) (B)

**
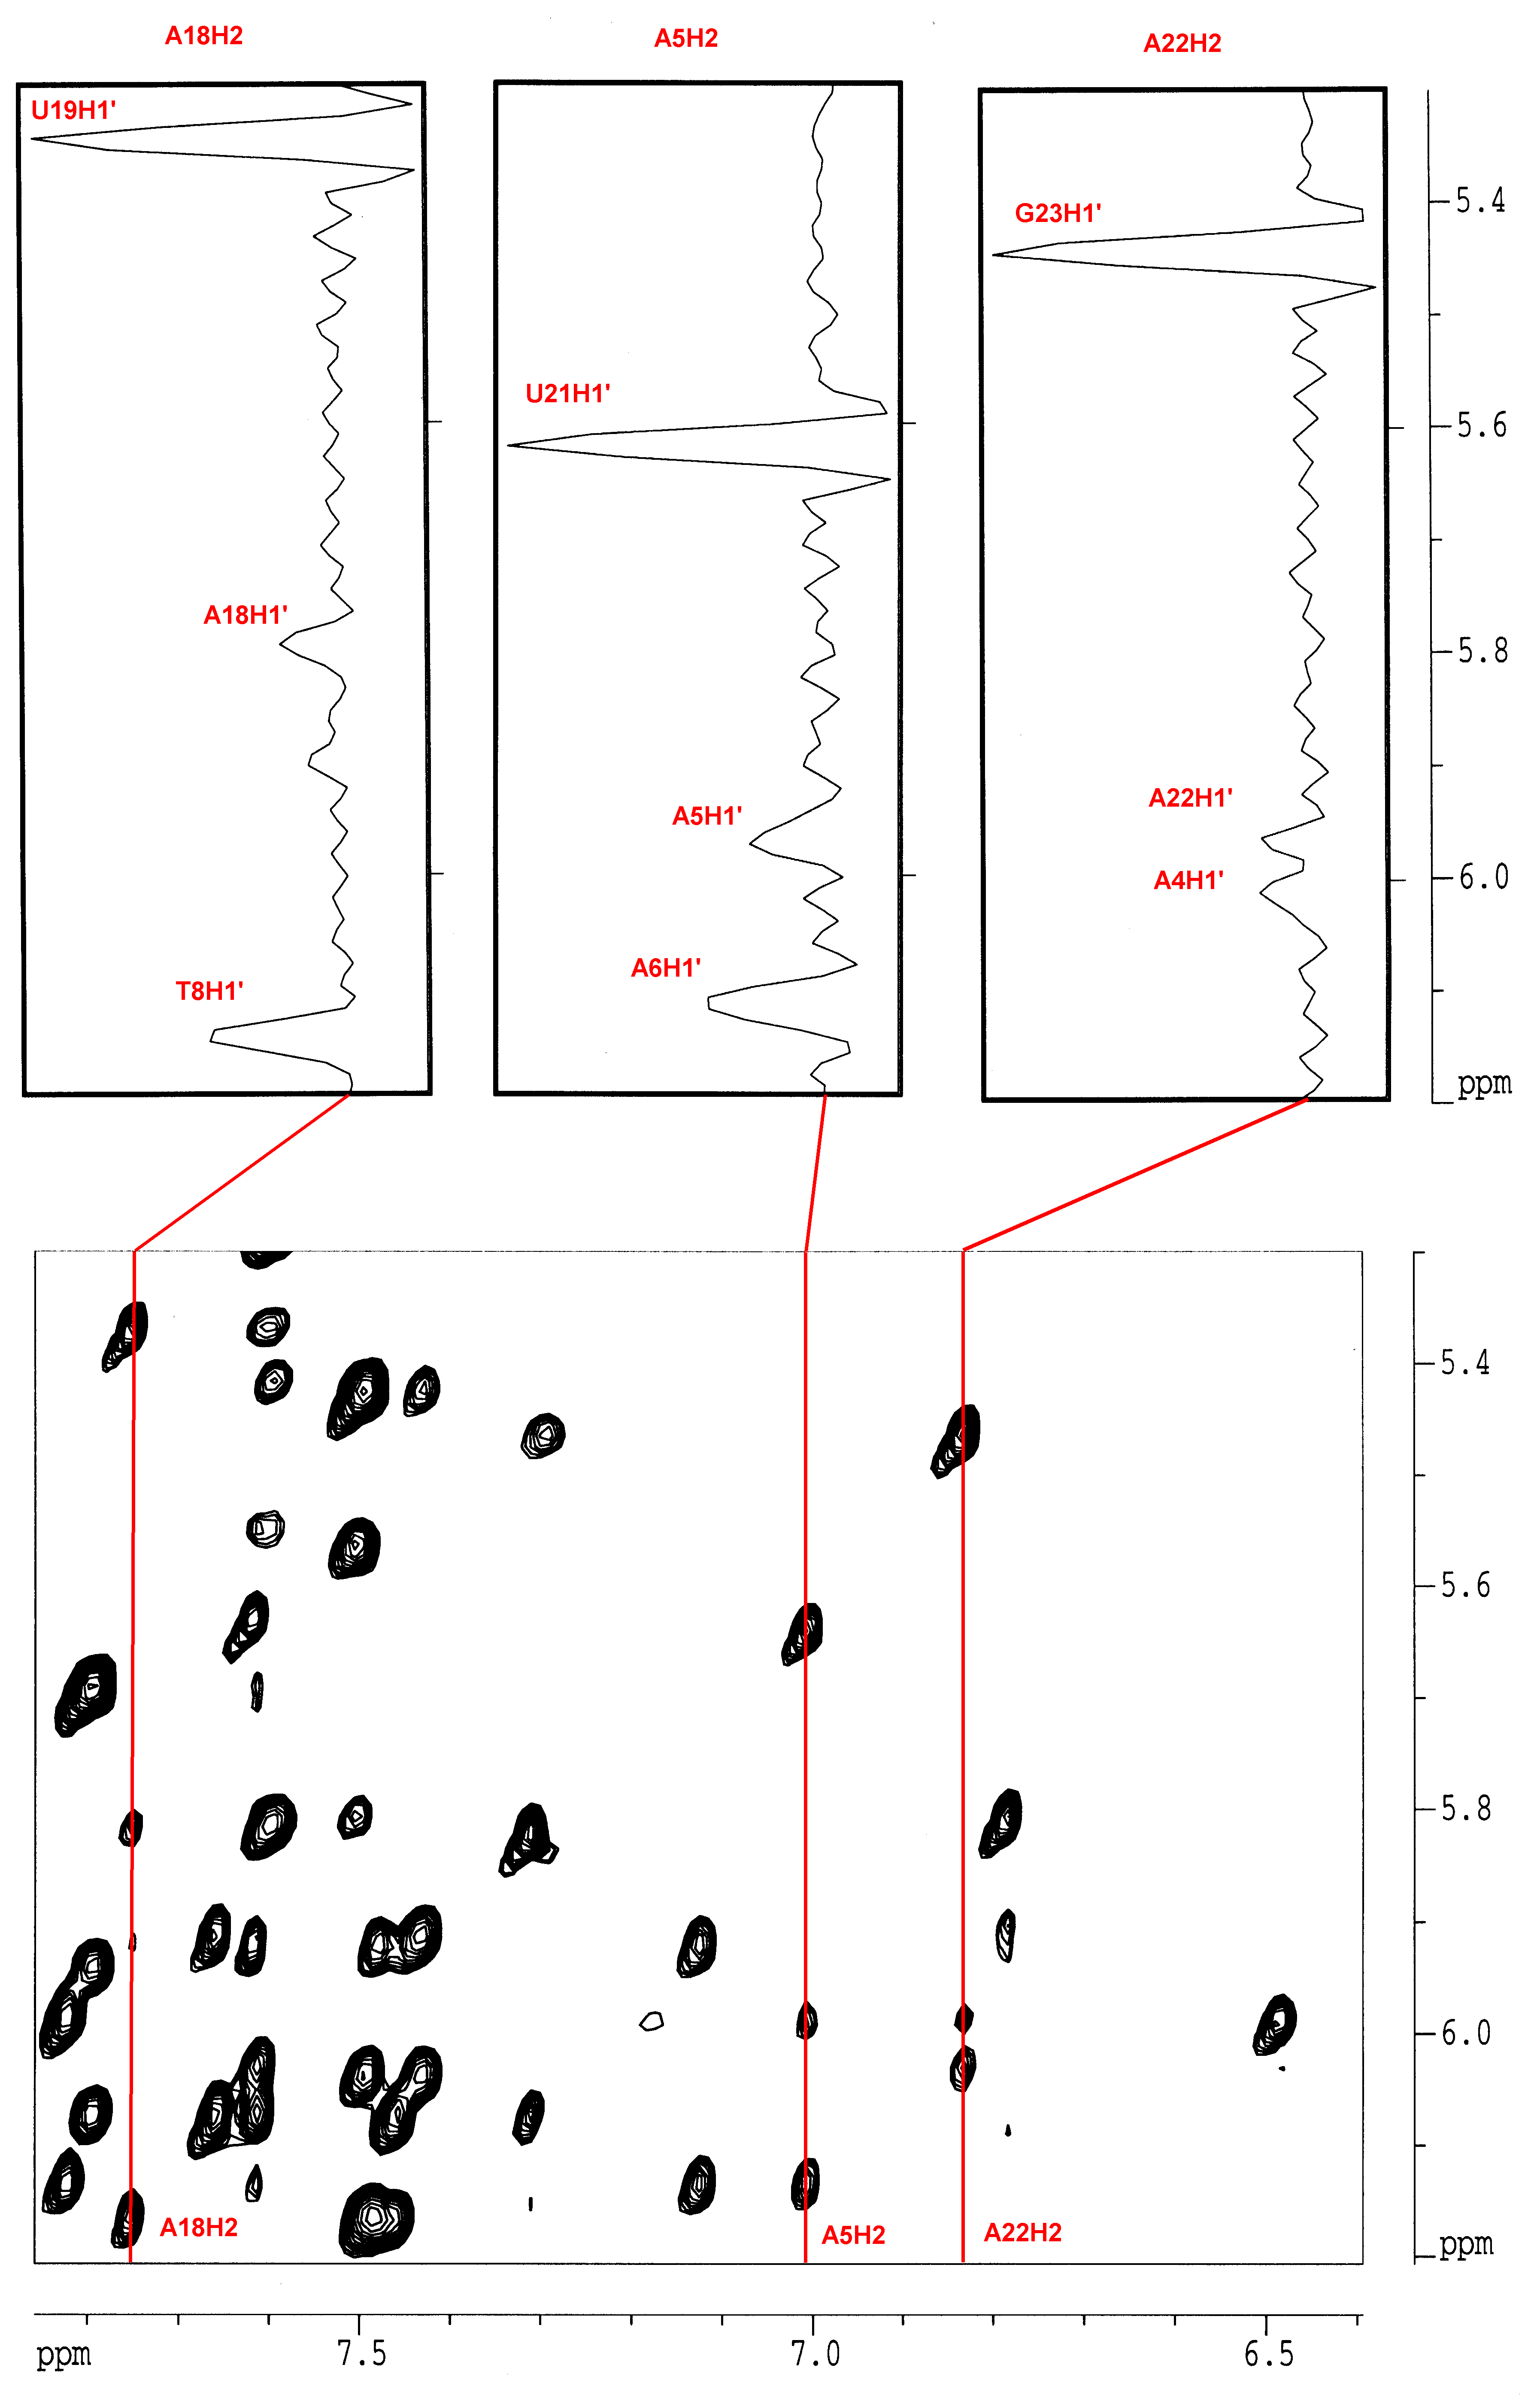
**
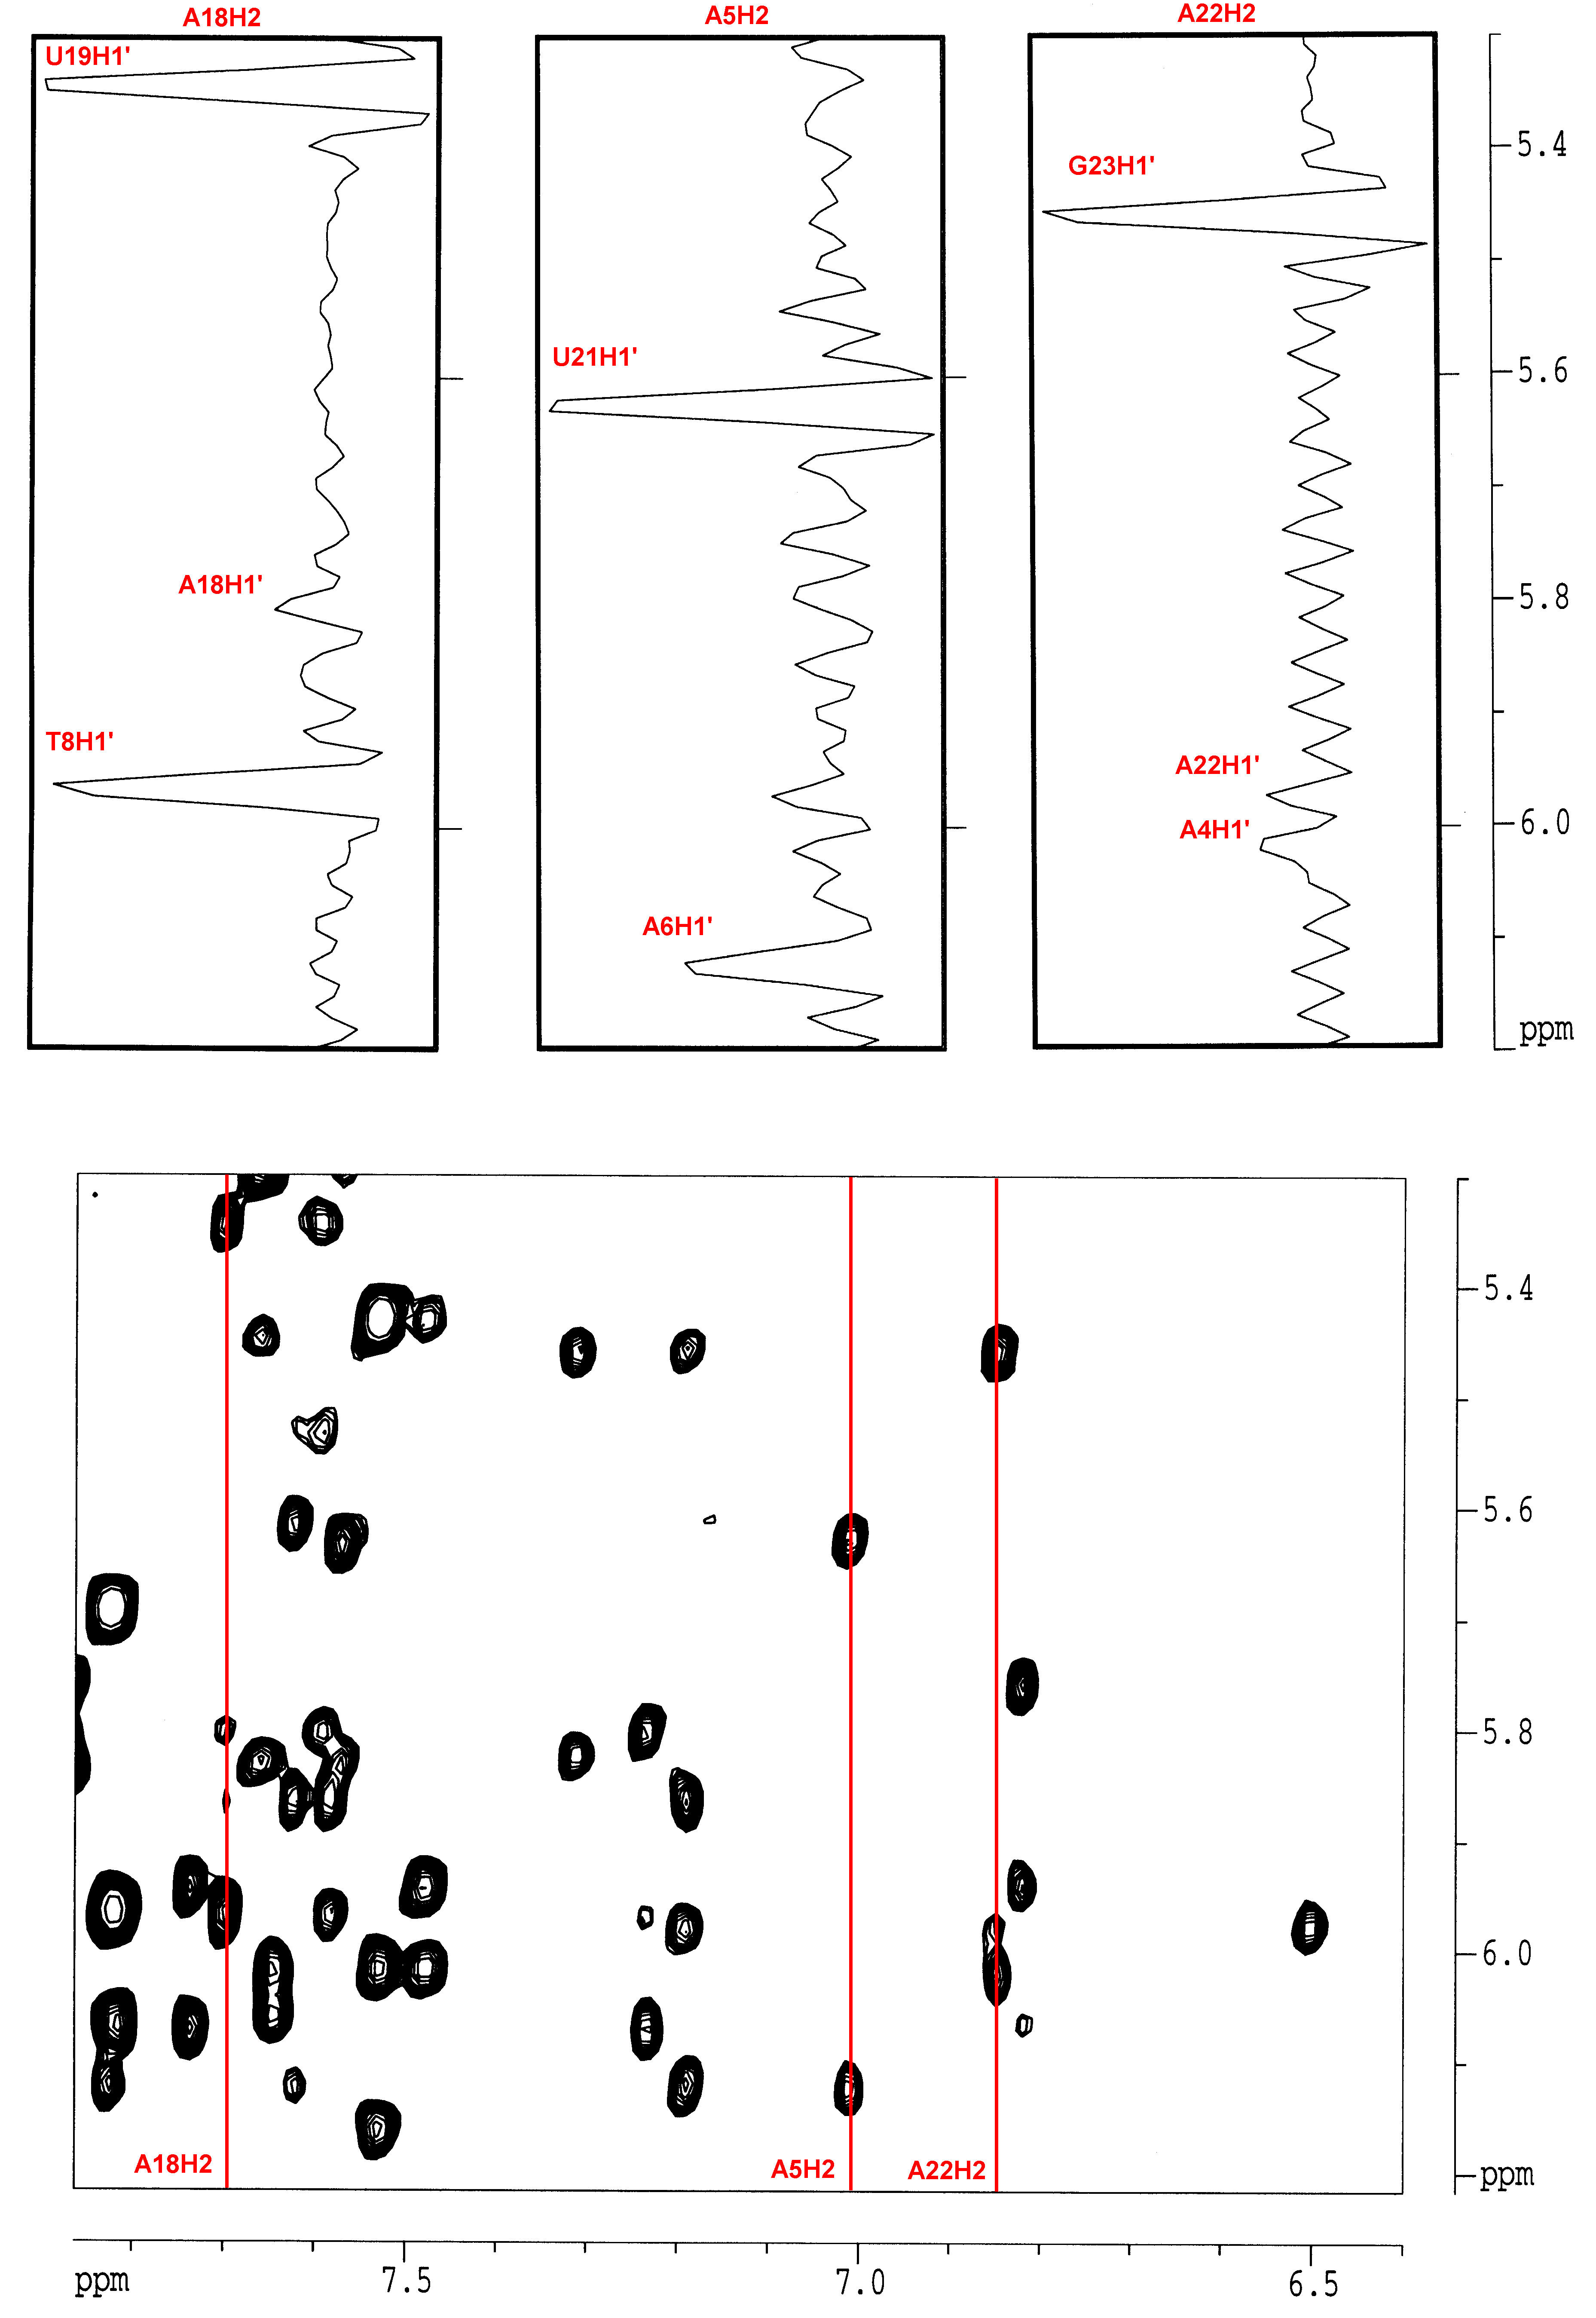


Figure S12 Example of data available from fine structure of PECOSY cross peaks. A DNA H1’-H2’ cross peak is shown.

H2’

A C .

A B .

H1’ F2

B A A .

C

F1

negative peak positive peak

A JH1’-H2’ B JH1’-H2” C JH2’-H2”

In Figure S13 are sections of the 500 MHz PECOSY spectrum (subtraction within the pulse sequence). Spectra were acquired over 1024 t1increments and 4096 data points in t2 with TPPI phase cycling. A flip angle of 35 degrees was used. Specific regions of the spectra were strip processed to give an apparent matrix of 16k x 8k and a digital resolution of 0.3 Hz.

Figure S13. Expanded H1’-H2’/H2” region of 500 MHz PECOSY spectrum for (A) the natural and (B) the modified hybrid.

(A)


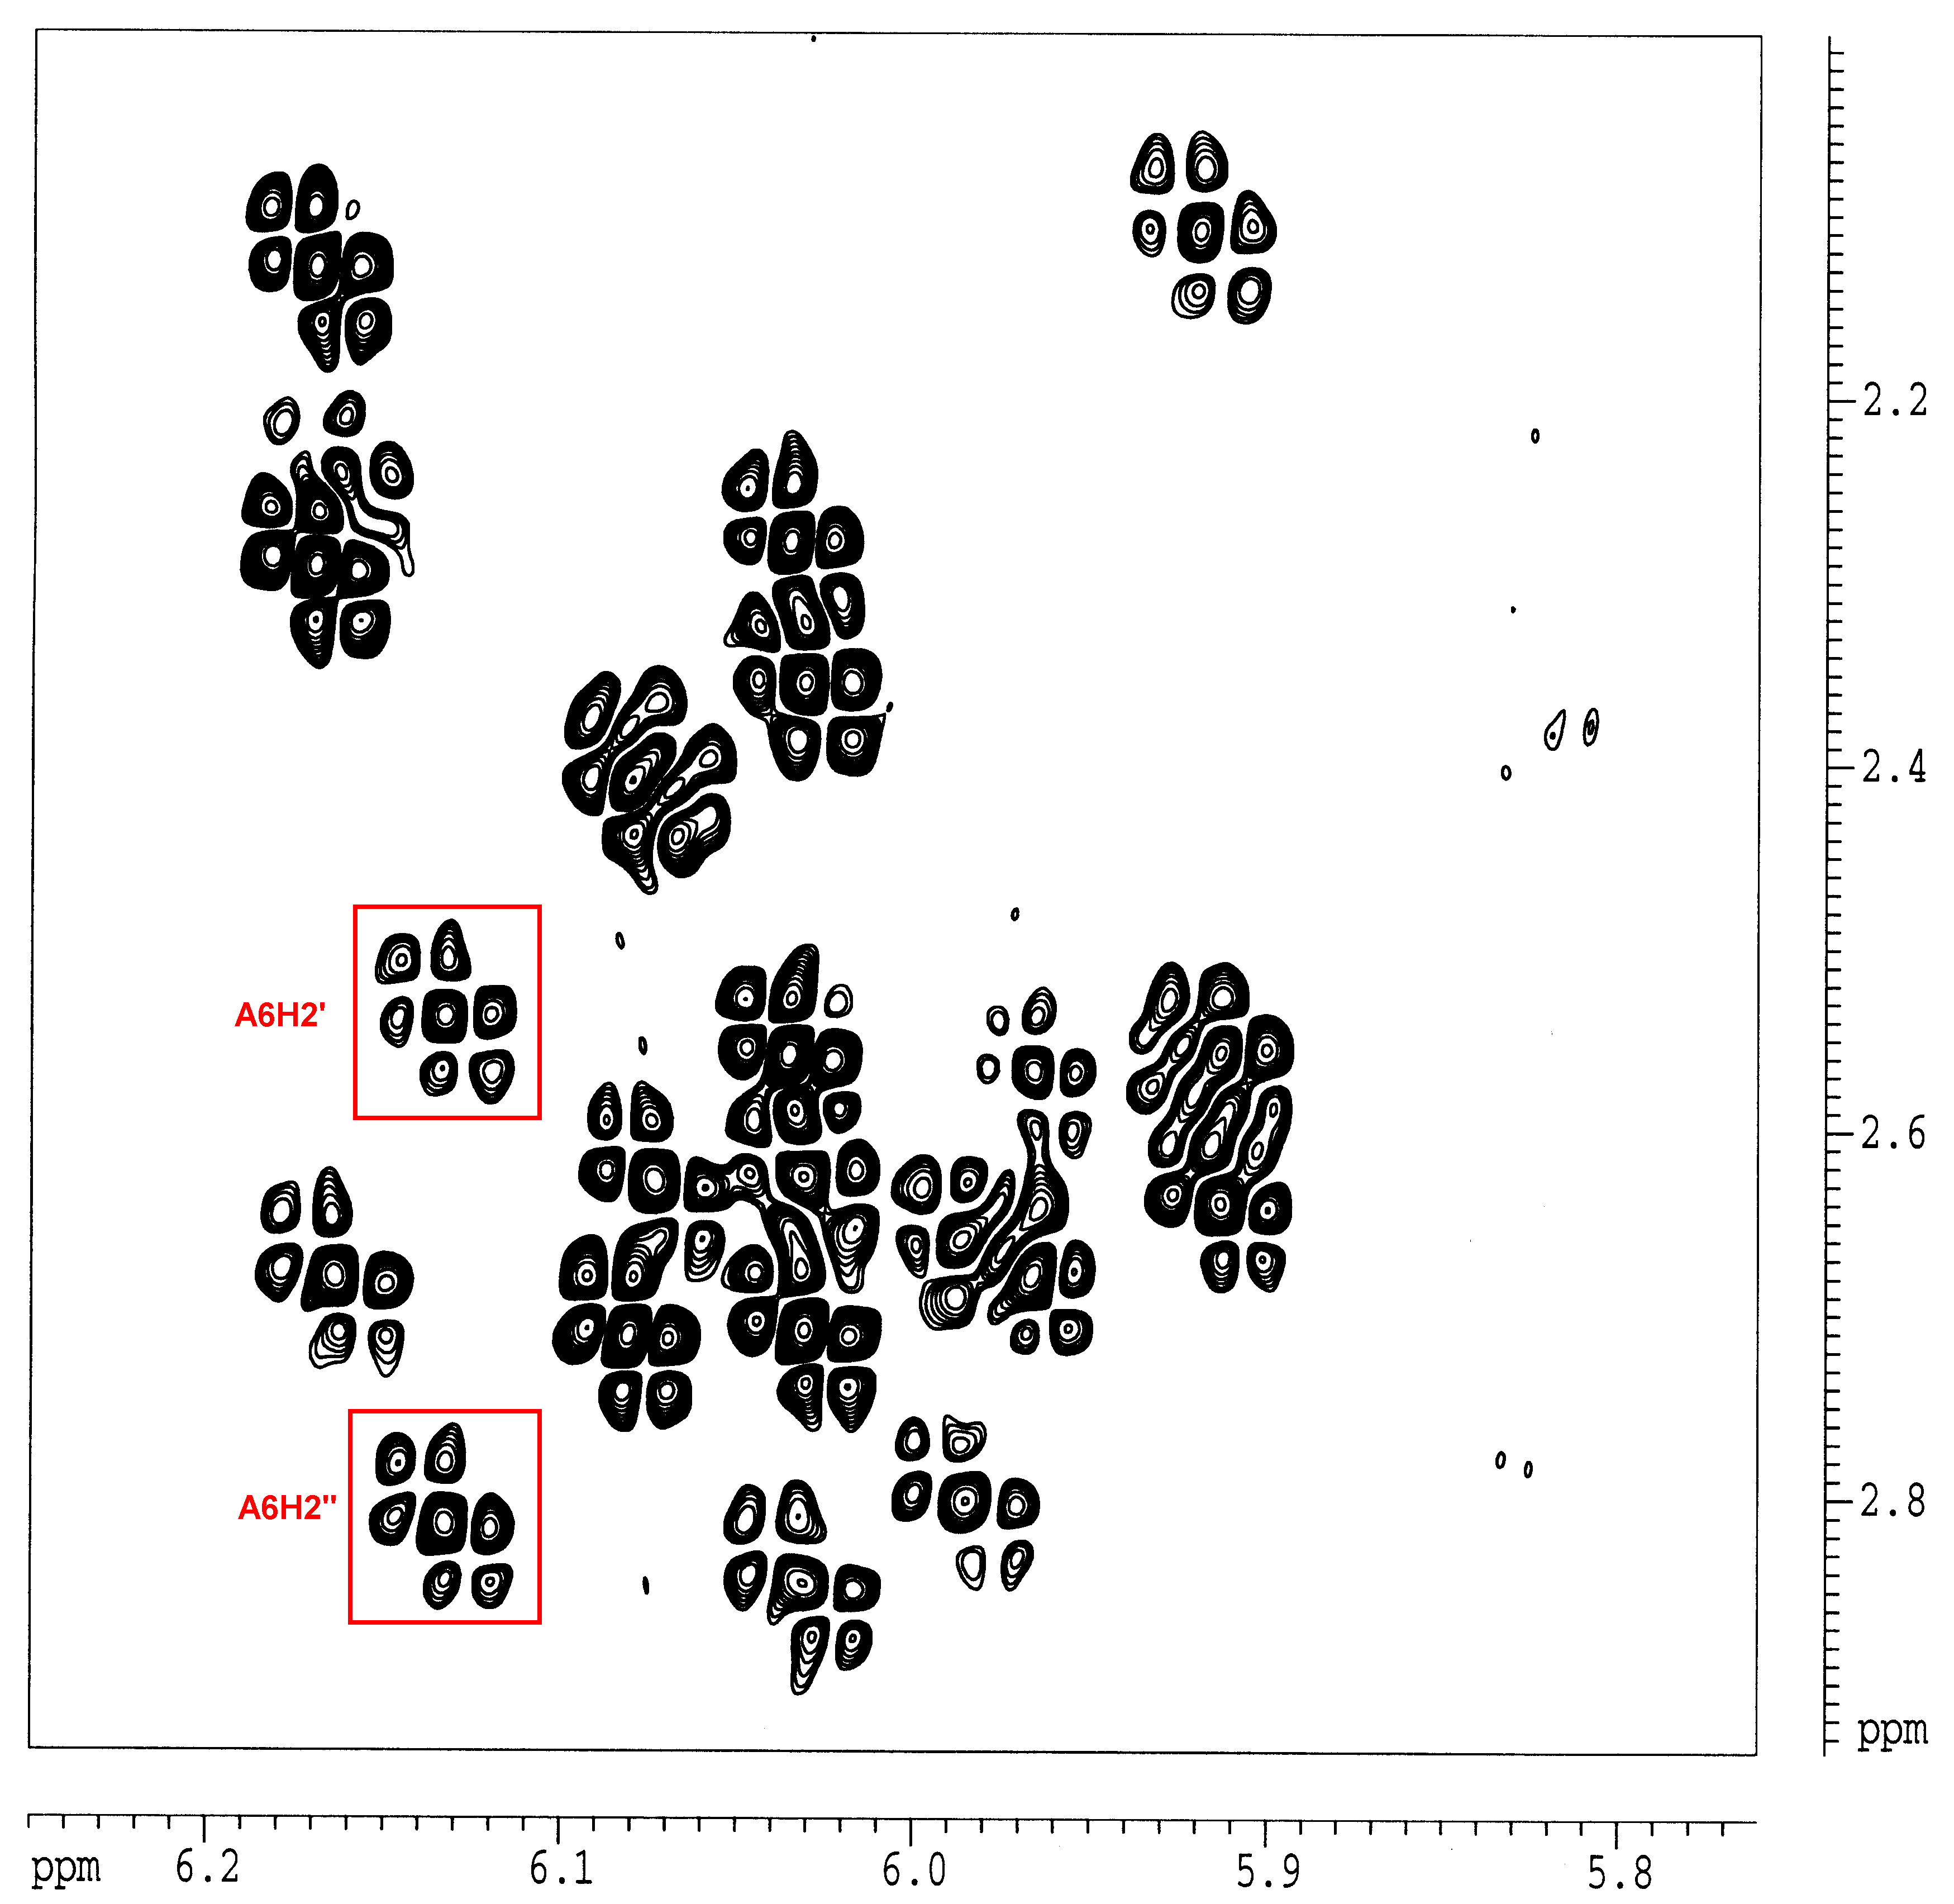


T7H2’

C12H2’

T8H2’

C12H2”

C11

T3

G10

A5

A4

T9

T9

(B)


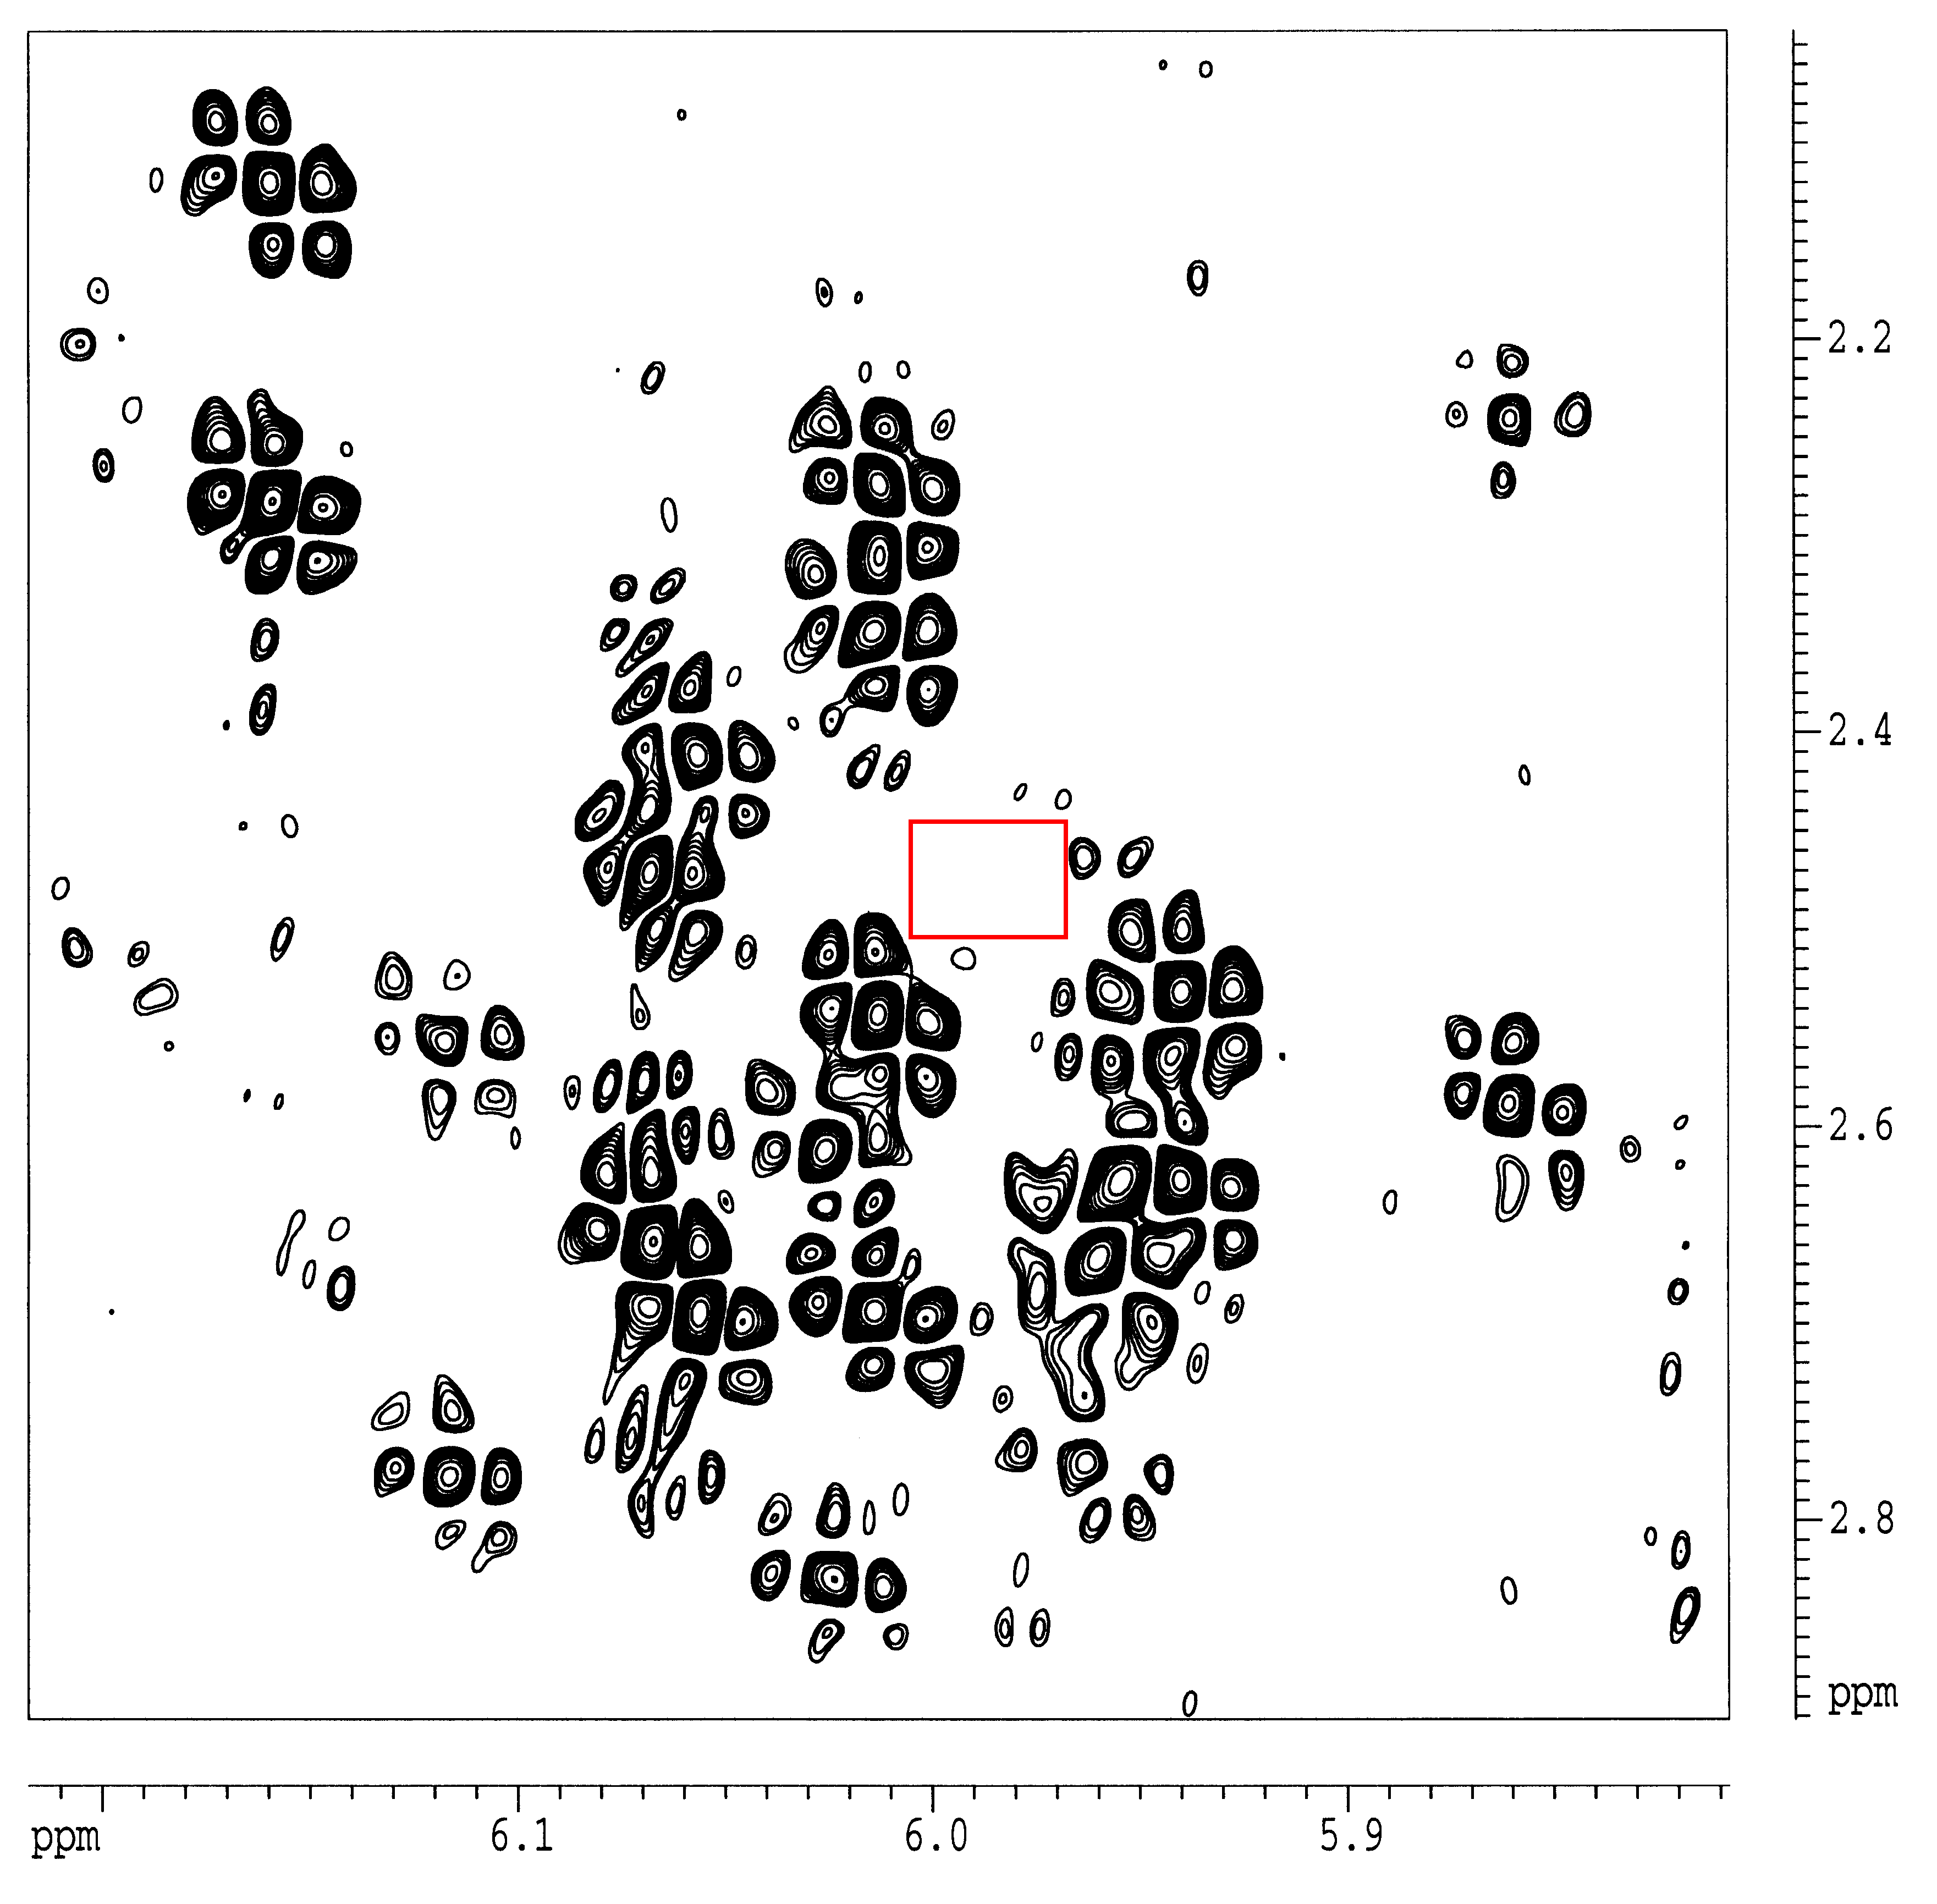


G10

T7

T7

T8

C11

T3

C12

C12

T9

A6

A4

Figure S14. Normalised melting curves of natural and modified hybrids. Samples were recorded in 10 mM phosphate buffer at a concentration of 4 M

Plot of the derivative of the melting curves against temperature for the natural and modified hybrids, demonstrating melting temperatures, Tm

Absorbance was followed at 260 nm. The sample temperature, monitored by a probe suspended in the cuvette, was increased in half degree increments from 12 to 90 0C, with a 5 min equilibration period before each reading. Two repetitions of the experiment were performed.

Tm = 28.7 C

Tm = 26.2 C
